# Supplementary material for: Substituent effects on intramolecular Schmidt reactions: a theoretical study on the formation of bridged lactams
Source: Royal Society of Chemistry journal article supplement (doi:10.1039/d3ob00532a), 2023-01-01
Supplement: d3ob00532a1.pdf [file d3ob00532a1.pdf]

## SUPPORT INFORMATION

# Substituent effects on intramolecular Schmidt reactions: a theoretical study on the formation of bridged lactams

Guilherme L. Kosteczka,<sup>a</sup> Rafael N. Soek,<sup>a</sup> Wagner E. Richter<sup>a</sup> and Renan B. Campos<sup>a\*</sup>

<sup>a</sup>Universidade Tecnológica Federal do Paraná. Rua Deputado Heitor de Alencar Furtado, 5000, 81280-340, Curitiba, PR, Brazil.

\*[renan@utfpr.edu.br](mailto:renan@utfpr.edu.br)

### Table of Contents

|                                                                                                                                                                                                             |           |
|-------------------------------------------------------------------------------------------------------------------------------------------------------------------------------------------------------------|-----------|
| <b>1. The parent reaction .....</b>                                                                                                                                                                         | <b>6</b>  |
| <i>Figure S1. Optimized geometries for the formation of 1(II) from I (Figure 1) and energy profile obtained from intrinsic reaction coordinates calculations using M06-2X/6-31+G(d,p) level of theory.</i>  | 6         |
| <i>Figure S2. Optimized geometries for the formation of 1(III) from I (Figure 1) and energy profile obtained from intrinsic reaction coordinates calculations using M06-2X/6-31+G(d,p) level of theory.</i> | 6         |
| 1.2. NBO analysis.....                                                                                                                                                                                      | 7         |
| <i>Table S1. Total hyperconjugation energy (kcal mol<sup>-1</sup>) for species involved in the rate-determining step of system 1. ....</i>                                                                  | 7         |
| 1.3. Cartesian coordinates of ketoazide I (blue pathway, Figure 1).....                                                                                                                                     | 7         |
| 1.4 Cartesian coordinates of 1(II)-TSS1.....                                                                                                                                                                | 8         |
| 1.5 Cartesian coordinates of 1(II)-INT.....                                                                                                                                                                 | 8         |
| 1.6 Cartesian coordinates of 1(II)-TSS2.....                                                                                                                                                                | 9         |
| 1.7 Cartesian coordinates of lactam 1(II).....                                                                                                                                                              | 10        |
| 1.8 Cartesian coordinates of ketoazide I (red pathway, Figure 1).....                                                                                                                                       | 10        |
| 1.9 Cartesian coordinates of 1(III)-TSS1.....                                                                                                                                                               | 11        |
| 1.10 Cartesian coordinates of 1(III)-INT.....                                                                                                                                                               | 12        |
| 1.11 Cartesian coordinates of 1(III)-TSS2.....                                                                                                                                                              | 12        |
| 1.12 Cartesian coordinates of lactam 1(III).....                                                                                                                                                            | 13        |
| 1.13 Cartesian coordinates of 1(III)-INT-Conformer-B.....                                                                                                                                                   | 14        |
| 1.14 Cartesian coordinates of 1(III)-TSS2-Conformer-B.....                                                                                                                                                  | 14        |
| <b>2. Screening of functionals and basis sets. ....</b>                                                                                                                                                     | <b>15</b> |
| <i>Table S2. Energy barriers (in kcal mol<sup>-1</sup>)<sup>[a]</sup> and product distribution (%)<sup>[b]</sup> obtained using different levels of theory.. ....</i>                                       | 15        |
| <b>3. Calculation data for system 1 (R<sub>1</sub>=H and R<sub>2</sub>=H) using M06-2X/6-311++G(d,p) level of theory.</b>                                                                                   | <b>15</b> |
| 3.1 Cartesian coordinates of 1(II)-INT.....                                                                                                                                                                 | 15        |

|                                                                                                                                                                                                                                                                                                                                                                                                                                                                                          |           |
|------------------------------------------------------------------------------------------------------------------------------------------------------------------------------------------------------------------------------------------------------------------------------------------------------------------------------------------------------------------------------------------------------------------------------------------------------------------------------------------|-----------|
| 3.2 Cartesian coordinates of 1(II)-TSS2.....                                                                                                                                                                                                                                                                                                                                                                                                                                             | 16        |
| 3.3 Cartesian coordinates of 1(III)-INT.....                                                                                                                                                                                                                                                                                                                                                                                                                                             | 17        |
| 3.4 Cartesian coordinates of 1(III)-TSS2.....                                                                                                                                                                                                                                                                                                                                                                                                                                            | 17        |
| <b>4. Calculation data for systems 2 (R<sub>1</sub>=SCH<sub>3</sub> and R<sub>2</sub>=H) and 3 (R<sub>1</sub>=H and R<sub>2</sub>=SCH<sub>3</sub>) using M06-2X/6-311++G(d,p) level of theory.....</b>                                                                                                                                                                                                                                                                                   | <b>18</b> |
| 4.1. IRCs.....                                                                                                                                                                                                                                                                                                                                                                                                                                                                           | 19        |
| <i>Figure S3. Optimized geometries for the formation of 2(II) from 2(II)-INT and and IRC plot obtained using M06-2X/6-311++G(d,p) level of theory. ....</i>                                                                                                                                                                                                                                                                                                                              | <i>19</i> |
| <i>Figure S4. Optimized geometries for the formation of 2(III) from 2(III)-INT and and IRC plot obtained using M06-2X/6-311++G(d,p) level of theory. ....</i>                                                                                                                                                                                                                                                                                                                            | <i>19</i> |
| <i>Figure S5. Optimized geometries for the formation of 3(II) from 3(II)-INT and IRC plot obtained using M06-2X/6-311++G(d,p) level of theory.....</i>                                                                                                                                                                                                                                                                                                                                   | <i>20</i> |
| <i>Figure S6. Optimized geometries for the formation of 3(III) from 3(III)-INT and IRC plot obtained using M06-2X/6-311++G(d,p) level of theory. ....</i>                                                                                                                                                                                                                                                                                                                                | <i>20</i> |
| 4.2. NCI .....                                                                                                                                                                                                                                                                                                                                                                                                                                                                           | 21        |
| <i>Figure S7. NCI isosurfaces for 3(II)-INT (top left), 3(II)-TSS2 (top right), 3(III)-INT (bottom left) and 3(III)-TSS2 (bottom right) obtained at M06-2X/6-311++G(d,p) level of theory using a blue-green-red color scale from <math>-0.04 &lt; \text{sign}(\lambda^2)\rho &lt; 0.04</math> a.u. Plots of the reduced density gradient and <math>\text{sign}(\lambda^2)\rho</math> are shown right under each correlated NCI isosurface obtained at the same level of theory. ....</i> | <i>22</i> |
| 4.3 NBO analysis.....                                                                                                                                                                                                                                                                                                                                                                                                                                                                    | 20        |
| <i>Table S3. Total donor-acceptor interactions of type <math>n(S) \leftrightarrow \sigma^*, \pi^*(N-N)</math> (in kcal mol<sup>-1</sup>) of system 2 (R<sub>1</sub>=SCH<sub>3</sub>, R<sub>2</sub>=H) and system 3 (R<sub>1</sub>=H, R<sub>2</sub>=SCH<sub>3</sub>) obtained by NBO calculations at M06-2X/6-311++G(d,p) level of theory.....</i>                                                                                                                                        | <i>20</i> |
| 4.4 Cartesian coordinates of 2(II)-INT.....                                                                                                                                                                                                                                                                                                                                                                                                                                              | 22        |
| 4.5 Cartesian coordinates of 2(II)-TSS2.....                                                                                                                                                                                                                                                                                                                                                                                                                                             | 23        |
| 4.6 Cartesian coordinates of 2(II) .....                                                                                                                                                                                                                                                                                                                                                                                                                                                 | 23        |
| 4.7 Cartesian coordinates of 2(III)-INT.....                                                                                                                                                                                                                                                                                                                                                                                                                                             | 24        |
| 4.8 Cartesian coordinates of 2(III)-TSS2.....                                                                                                                                                                                                                                                                                                                                                                                                                                            | 25        |
| 4.9 Cartesian coordinates of 2(III) .....                                                                                                                                                                                                                                                                                                                                                                                                                                                | 26        |
| 4.10 Cartesian coordinates of 3(II)-INT.....                                                                                                                                                                                                                                                                                                                                                                                                                                             | 26        |
| 4.11 Cartesian coordinates of 3(II)-TSS2.....                                                                                                                                                                                                                                                                                                                                                                                                                                            | 27        |
| 4.12 Cartesian coordinates of 3(II) .....                                                                                                                                                                                                                                                                                                                                                                                                                                                | 28        |
| 4.13 Cartesian coordinates of 3(III)-INT.....                                                                                                                                                                                                                                                                                                                                                                                                                                            | 29        |
| 4.14 Cartesian coordinates of 3(III)-TSS2.....                                                                                                                                                                                                                                                                                                                                                                                                                                           | 29        |
| 4.15 Cartesian coordinates of 3(III) .....                                                                                                                                                                                                                                                                                                                                                                                                                                               | 30        |
| <b>5. Calculation data for systems 4 (R<sub>1</sub>=OCH<sub>3</sub> and R<sub>2</sub>=H) and 5 (R<sub>1</sub>=H and R<sub>2</sub>=OCH<sub>3</sub>) using M06-2X/6-311++G(d,p) level of theory.....</b>                                                                                                                                                                                                                                                                                   | <b>31</b> |
| 5.1. IRCs.....                                                                                                                                                                                                                                                                                                                                                                                                                                                                           | 31        |
| <i>Figure S8. Optimized geometries for the formation of 3(III) from 3(III)-INT and IRC plot obtained using M06-2X/6-311++G(d,p) level of theory. ....</i>                                                                                                                                                                                                                                                                                                                                | <i>31</i> |
| <i>Figure S9. Optimized geometries for the formation of 3(III) from 3(III)-INT and IRC plot obtained using M06-2X/6-311++G(d,p) level of theory. ....</i>                                                                                                                                                                                                                                                                                                                                | <i>32</i> |
| <i>Figure S10. Optimized geometries for the formation of 3(III) from 3(III)-INT and IRC plot obtained using M06-2X/6-311++G(d,p) level of theory. ....</i>                                                                                                                                                                                                                                                                                                                               | <i>32</i> |

|                                                                                                                                                                                                                                                                                                                                                                                                                                                        |           |
|--------------------------------------------------------------------------------------------------------------------------------------------------------------------------------------------------------------------------------------------------------------------------------------------------------------------------------------------------------------------------------------------------------------------------------------------------------|-----------|
| Figure S11. Optimized geometries for the formation of 3(III) from 3(III)-INT and IRC plot obtained using M06-2X/6-311++G(d,p) level of theory.....                                                                                                                                                                                                                                                                                                     | 33        |
| <b>5.2. NCI .....</b>                                                                                                                                                                                                                                                                                                                                                                                                                                  | <b>33</b> |
| Figure S12. NCI isosurfaces for 4(II)-INT (top left), 4(II)-TSS2 (top right), 4(III)-INT (bottom left) and 4(III)-TSS2 (bottom right) obtained at M06-2X/6-311++G(d,p) level of theory using a blue-green-red color scale from $-0.04 < \text{sign}(\lambda^2)\rho < 0.04$ a.u. Plots of the reduced density gradient and $\text{sign}(\lambda^2)\rho$ are shown right under each correlated NCI isosurface obtained at the same level of theory. .... | 34        |
| Figure S13. NCI isosurfaces for 5(II)-INT (top left), 5(II)-TSS2 (top right), 5(III)-INT (bottom left) and 5(III)-TSS2 (bottom right) obtained at M06-2X/6-311++G(d,p) level of theory using a blue-green-red color scale from $-0.04 < \text{sign}(\lambda^2)\rho < 0.04$ a.u. Plots of the reduced density gradient and $\text{sign}(\lambda^2)\rho$ are shown right under each correlated NCI isosurface obtained at the same level of theory. .... | 35        |
| 5.3. Cartesian coordinates of 4(II)-TSS.....                                                                                                                                                                                                                                                                                                                                                                                                           | 35        |
| 5.4. Cartesian coordinates of 4(III)-TSS.....                                                                                                                                                                                                                                                                                                                                                                                                          | 36        |
| 5.5. Cartesian coordinates of 5(II)-TSS.....                                                                                                                                                                                                                                                                                                                                                                                                           | 37        |
| 5.6. Cartesian coordinates of 5(III)-TSS.....                                                                                                                                                                                                                                                                                                                                                                                                          | 37        |
| <b>6. Calculation data for systems 6 (R<sub>1</sub>=phenyl and R<sub>2</sub>=H) and 7 (R<sub>1</sub>=H and R<sub>2</sub>=phenyl) using M06-2X/6-311++G(d,p) level of theory.....</b>                                                                                                                                                                                                                                                                   | <b>38</b> |
| 6.1. IRCs.....                                                                                                                                                                                                                                                                                                                                                                                                                                         | 38        |
| Figure S14. Optimized geometries for the formation of 6(II) from 6(II)-INT and IRC plot obtained using M06-2X/6-311++G(d,p) level of theory. ....                                                                                                                                                                                                                                                                                                      | 39        |
| Figure S15. Optimized geometries for the formation of 6(III) from 6(III)-INT and IRC plot obtained using M06-2X/6-311++G(d,p) level of theory. ....                                                                                                                                                                                                                                                                                                    | 39        |
| Figure S16. Optimized geometries for the formation of 7(II) from 7(II)-INT and IRC plot obtained using M06-2X/6-311++G(d,p) level of theory. ....                                                                                                                                                                                                                                                                                                      | 40        |
| Figure S17. Optimized geometries for the formation of 7(III) from 7(III)-INT and IRC plot obtained using M06-2X/6-311++G(d,p) level of theory. ....                                                                                                                                                                                                                                                                                                    | 40        |
| 6.2. NBO analysis.....                                                                                                                                                                                                                                                                                                                                                                                                                                 | 41        |
| Table S4. Total donor-acceptor interactions of type $\sigma, \pi$ (C-C(phenyl)) $\leftrightarrow \sigma^*, \pi^*$ (N-N) (in kcal mol <sup>-1</sup> ) of system 6 (R <sub>1</sub> =phenyl, R <sub>2</sub> =H) and system 7 (R <sub>1</sub> =H, R <sub>2</sub> =phenyl) obtained by NBO calculations at M06-2X/6-311++G(d,p) level of theory.....                                                                                                        | 41        |
| 6.3 Cartesian coordinates of 6(II)-INT.....                                                                                                                                                                                                                                                                                                                                                                                                            | 41        |
| 6.4 Cartesian coordinates of 6(II)-TSS2.....                                                                                                                                                                                                                                                                                                                                                                                                           | 42        |
| 6.5 Cartesian coordinates of 6(II).....                                                                                                                                                                                                                                                                                                                                                                                                                | 43        |
| 6.6 Cartesian coordinates of 6(III)-INT.....                                                                                                                                                                                                                                                                                                                                                                                                           | 44        |
| 6.7 Cartesian coordinates of 6(III)-TSS2.....                                                                                                                                                                                                                                                                                                                                                                                                          | 45        |
| 6.8 Cartesian coordinates of 6(III).....                                                                                                                                                                                                                                                                                                                                                                                                               | 46        |
| 6.9 Cartesian coordinates of 7(II)-INT.....                                                                                                                                                                                                                                                                                                                                                                                                            | 46        |
| 6.10 Cartesian coordinates of 7(II)-TSS2.....                                                                                                                                                                                                                                                                                                                                                                                                          | 47        |
| 6.11 Cartesian coordinates of 7(II).....                                                                                                                                                                                                                                                                                                                                                                                                               | 48        |
| 6.12 Cartesian coordinates of 7(III)-INT.....                                                                                                                                                                                                                                                                                                                                                                                                          | 49        |
| 6.13 Cartesian coordinates of 7(III)-TSS2.....                                                                                                                                                                                                                                                                                                                                                                                                         | 50        |
| 6.14 Cartesian coordinates of 7(III).....                                                                                                                                                                                                                                                                                                                                                                                                              | 51        |
| <b>7. Calculation data for systems 8 (R<sub>1</sub>=t-butyl and R<sub>2</sub>=H) and 9 (R<sub>1</sub>=H and R<sub>2</sub>=t-butyl) using M06-2X/6-311++G(d,p) level of theory.....</b>                                                                                                                                                                                                                                                                 | <b>52</b> |

|                                                                                                                                                                                                                                                                                                                                                                                           |           |
|-------------------------------------------------------------------------------------------------------------------------------------------------------------------------------------------------------------------------------------------------------------------------------------------------------------------------------------------------------------------------------------------|-----------|
| 7.1. IRCs.....                                                                                                                                                                                                                                                                                                                                                                            | 52        |
| Figure S18. Optimized geometries for the formation of 8(II) from 8(II)-INT and IRC plot obtained using M06-2X/6-311++G(d,p) level of theory.....                                                                                                                                                                                                                                          | 52        |
| Figure S19. Optimized geometries for the formation of 8(III) from 8(III)-INT and IRC plot obtained using M06-2X/6-311++G(d,p) level of theory.....                                                                                                                                                                                                                                        | 53        |
| Figure S20. Optimized geometries for the formation of 9(II) from 9(II)-INT and IRC plot obtained using M06-2X/6-311++G(d,p) level of theory.....                                                                                                                                                                                                                                          | 53        |
| Figure S21. Optimized geometries for the formation of 9(III) from 9(III)-INT and IRC plot obtained using M06-2X/6-311++G(d,p) level of theory.....                                                                                                                                                                                                                                        | 54        |
| 7.2 Cartesian coordinates of 8(II)-INT.....                                                                                                                                                                                                                                                                                                                                               | 54        |
| 7.3 Cartesian coordinates of 8(II)-TSS2.....                                                                                                                                                                                                                                                                                                                                              | 55        |
| 7.4 Cartesian coordinates of 8(II).....                                                                                                                                                                                                                                                                                                                                                   | 56        |
| 7.5 Cartesian coordinates of 8(III)-INT.....                                                                                                                                                                                                                                                                                                                                              | 57        |
| 7.6 Cartesian coordinates of 8(III)-TSS2.....                                                                                                                                                                                                                                                                                                                                             | 58        |
| 7.7 Cartesian coordinates of 8(III).....                                                                                                                                                                                                                                                                                                                                                  | 59        |
| 7.8 Cartesian coordinates of 9(II)-INT.....                                                                                                                                                                                                                                                                                                                                               | 60        |
| 7.9 Cartesian coordinates of 9(II)-TSS2.....                                                                                                                                                                                                                                                                                                                                              | 61        |
| 7.10 Cartesian coordinates of 9(II).....                                                                                                                                                                                                                                                                                                                                                  | 62        |
| 7.11 Cartesian coordinates of 9(III)-INT.....                                                                                                                                                                                                                                                                                                                                             | 63        |
| 7.12 Cartesian coordinates of 9(III)-TSS2.....                                                                                                                                                                                                                                                                                                                                            | 64        |
| 7.13 Cartesian coordinates of 9(III).....                                                                                                                                                                                                                                                                                                                                                 | 65        |
| <b>8. Additional groups data .....</b>                                                                                                                                                                                                                                                                                                                                                    | <b>66</b> |
| 8.1 Calculation data for CF <sub>3</sub> -systems.....                                                                                                                                                                                                                                                                                                                                    | 66        |
| Figure S22. TSSs, relative free energies (in kcal mol <sup>-1</sup> , in parentheses) and percentage of formation for the second and rate determinant step for reaction presented in Scheme 1, R <sub>1</sub> -F-System (R <sub>1</sub> =F, R <sub>2</sub> =H) and R <sub>2</sub> -F-System (R <sub>1</sub> =H, R <sub>2</sub> =F), obtained at M06-2X/6-311++G(d,p) level of theory..... | 66        |
| 8.1.1 IRCs.....                                                                                                                                                                                                                                                                                                                                                                           | 67        |
| Figure S23. IRC plot for R <sub>1</sub> -CF <sub>3</sub> (II)-TSS2 (Figure S22) calculated at M06-2X/6-311++G(d,p) level of theory.....                                                                                                                                                                                                                                                   | 67        |
| Figure S24. IRC plot for R <sub>1</sub> -CF <sub>3</sub> (III)-TSS2 (Figure S22) calculated at M06-2X/6-311++G(d,p) level of theory.....                                                                                                                                                                                                                                                  | 67        |
| Figure S25. IRC plot for R <sub>2</sub> -CF <sub>3</sub> (II)-TSS2 (Figure S22) calculated at M06-2X/6-311++G(d,p) level of theory.....                                                                                                                                                                                                                                                   | 68        |
| Figure S26. IRC plot for R <sub>2</sub> -CF <sub>3</sub> (III)-TSS2 (Figure S22) calculated at M06-2X/6-311++G(d,p) level of theory.....                                                                                                                                                                                                                                                  | 68        |
| <b>8.2 Calculation data for F-systems .....</b>                                                                                                                                                                                                                                                                                                                                           | <b>69</b> |
| Figure S27. TSSs, relative free energies (in kcal mol <sup>-1</sup> , in parentheses) and percentage of formation for the second and rate determinant step for reaction presented in Scheme 1, R <sub>1</sub> -F-System (R <sub>1</sub> =F, R <sub>2</sub> =H) and R <sub>2</sub> -F-System (R <sub>1</sub> =H, R <sub>2</sub> =F), obtained at M06-2X/6-311++G(d,p) level of theory..... | 69        |
| Figure S28. IRC plot for R <sub>1</sub> -F(II)-TSS2 (Figure S27) calculated at M06-2X/6-311++G(d,p) level of theory.....                                                                                                                                                                                                                                                                  | 69        |
| Figure S29. IRC plot for R <sub>1</sub> -F(III)-TSS2 (Figure S27) calculated at M06-2X/6-311++G(d,p) level of theory.....                                                                                                                                                                                                                                                                 | 70        |

|                                                                                                                                             |           |
|---------------------------------------------------------------------------------------------------------------------------------------------|-----------|
| <i>Figure S30. IRC plot for R<sub>2</sub>-F(II)-TSS2 (Figure S27) calculated at M06-2X/6-311++G(d,p) level of theory.....</i>               | <i>70</i> |
| <i>Figure S31. IRC plot for R<sub>2</sub>-F(III)-TSS2 (Figure S27) calculated at M06-2X/6-311++G(d,p) level of theory.....</i>              | <i>71</i> |
| <b>8.3. Calculation data for CH<sub>3</sub>-systems.....</b>                                                                                | <b>71</b> |
| <i>Figure S33. IRC plot for R<sub>1</sub>-CH<sub>3</sub>(III)-TSS2 (Figure S23) calculated at M06-2X/6-311++G(d,p) level of theory.....</i> | <i>72</i> |
| <i>Figure S34. IRC plot for R<sub>1</sub>-CH<sub>3</sub>(III)-TSS2 (Figure S23) calculated at M06-2X/6-311++G(d,p) level of theory.....</i> | <i>72</i> |
| <i>Figure S35. IRC plot for R<sub>2</sub>-CH<sub>3</sub>(II)-TSS2 (Figure S23) calculated at M06-2X/6-311++G(d,p) level of theory.....</i>  | <i>73</i> |
| <i>Figure S36. IRC plot for R<sub>2</sub>-CH<sub>3</sub>(III)-TSS2 (Figure S23) calculated at M06-2X/6-311++G(d,p) level of theory.....</i> | <i>73</i> |

## 1. The parent reaction

Calculation results for the parent system (system 1,  $R_1=H$  and  $R_2=H$ ) were obtained at M06-2X/6-31+g(d,p) level of theory. Cartesian coordinates and additional relevant data are presented as follows.

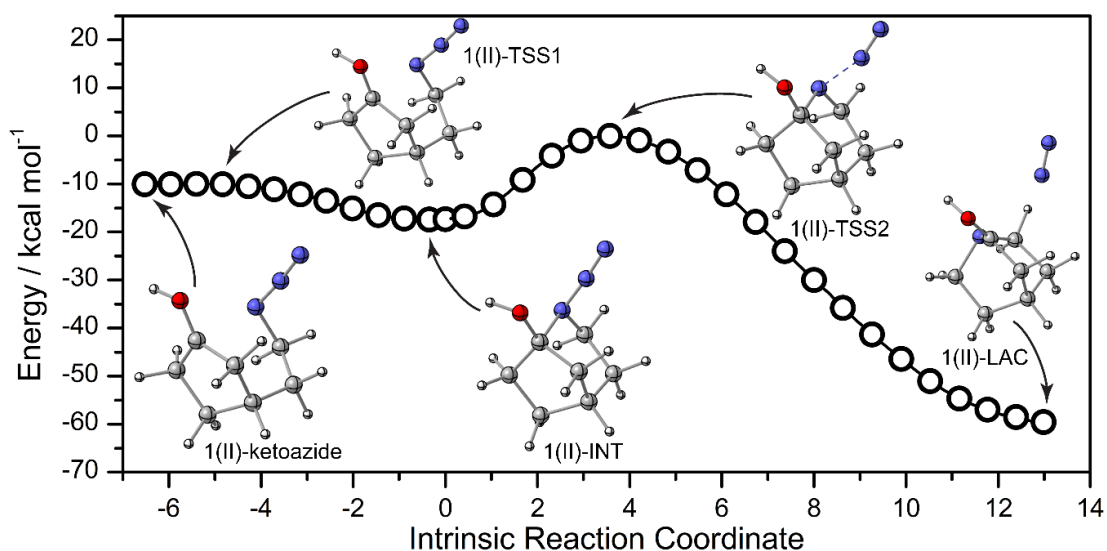

**Figure S1.** Optimized geometries for the formation of 1(II) from I (Figure 1) and energy profile obtained from intrinsic reaction coordinates calculations using M06-2X/6-31+G(d,p) level of theory.

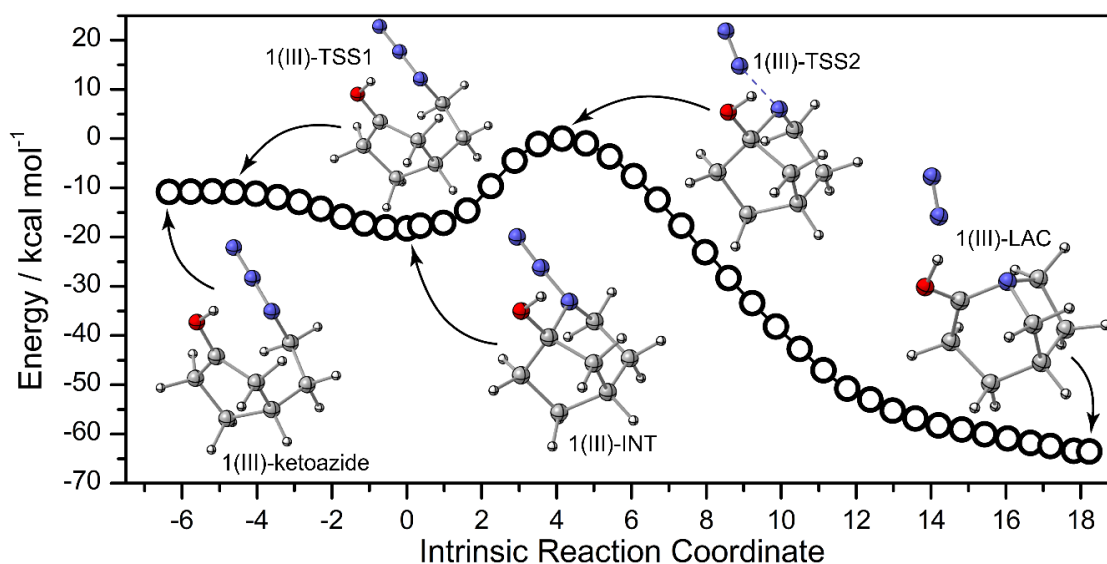

**Figure S2.** Optimized geometries for the formation of 1(III) from I (Figure 1) and energy profile obtained from intrinsic reaction coordinates calculations using M06-2X/6-31+G(d,p) level of theory.

## 1.2. NBO analysis

NBO analysis indicated that the total hyperconjugation energy is higher in 1(II)-TSS2 than 1(III)-TSS2, as presented in Table S1, which explains a more favorable formation of 1(II). Another aspect of this is that less hyperconjugation stabilization is lost reaching 1(II)-TSS2 from 1(II)-INT than reaching 1(III)-TSS2 from 1(III)-INT, as also presented in Table S1.

**Table S1.** Total hyperconjugation energy (kcal mol<sup>-1</sup>) for species involved in the rate-determining step of system 1.

|        | Total hyperconjugation energy ( $\Sigma$ HE), kcal mol <sup>-1</sup> |           |                                                                                                |
|--------|----------------------------------------------------------------------|-----------|------------------------------------------------------------------------------------------------|
|        | INT (Eh)                                                             | TSS2 (Eh) | $\Sigma$ HE <sub>1(II)-TSS2</sub> – $\Sigma$ HE <sub>1(II)-INT</sub> (kcal mol <sup>-1</sup> ) |
| 1(II)  | 0.753517                                                             | 0.657622  | 60.2                                                                                           |
| 1(III) | 0.752835                                                             | 0.643214  | 68.8                                                                                           |

## 1.3. Cartesian coordinates of ketoazide I (blue pathway, Figure 1)

M06-2X/6-31+g(d,p)

|   |             |             |             |
|---|-------------|-------------|-------------|
| C | -2.13255900 | -0.68902700 | -0.25883200 |
| C | -0.65632400 | 0.41204800  | 1.31546100  |
| C | -0.74753500 | 1.22053300  | 0.08673900  |
| C | -1.67765700 | 0.63484300  | -0.91147500 |
| H | -2.19868500 | -1.49919700 | -0.98849700 |
| H | -3.12445500 | -0.55280800 | 0.17835000  |
| H | -1.42171400 | 0.84858100  | 1.98201400  |
| H | 0.30501200  | 0.49609300  | 1.83188600  |
| H | -2.49486200 | 1.34571800  | -1.09014700 |
| H | -1.14975700 | 0.51037300  | -1.86430200 |
| O | -0.19262300 | 2.36701300  | 0.00518400  |
| C | -1.10545800 | -0.99558800 | 0.86255100  |
| H | -1.60038400 | -1.49513200 | 1.69739400  |
| C | 0.05986500  | -1.89309500 | 0.41812800  |
| H | -0.31733300 | -2.91275800 | 0.28246500  |
| C | 0.74268800  | -1.48800300 | -0.88428800 |
| H | 1.59581700  | -2.13944700 | -1.09733200 |
| H | 0.05434300  | -1.54930500 | -1.72973800 |
| N | 1.18718300  | -0.06709100 | -0.87033500 |
| N | 2.15664400  | 0.15887000  | -0.13422800 |
| N | 3.02106300  | 0.46882400  | 0.52025400  |

|   |             |             |             |
|---|-------------|-------------|-------------|
| H | 0.80207700  | -1.93844400 | 1.22575600  |
| H | -0.36143400 | 2.81573900  | -0.84886500 |

#### 1.4 Cartesian coordinates of 1(II)-TSS1

M06-2X/6-31+g(d,p)

|   |             |             |             |
|---|-------------|-------------|-------------|
| C | -2.18558800 | -0.43015800 | -0.27482700 |
| C | -0.58863900 | 0.44612100  | 1.32120100  |
| C | -0.51067300 | 1.24033200  | 0.07607600  |
| C | -1.55640700 | 0.83472000  | -0.90559400 |
| H | -2.34209600 | -1.21742400 | -1.01544800 |
| H | -3.15935800 | -0.17438400 | 0.14854500  |
| H | -1.29739600 | 1.00208400  | 1.95791700  |
| H | 0.35714300  | 0.38246400  | 1.86815000  |
| H | -2.26748700 | 1.66652100  | -0.99604800 |
| H | -1.11503800 | 0.68254200  | -1.89567600 |
| O | 0.17646000  | 2.32386000  | 0.03157800  |
| C | -1.22663600 | -0.88074300 | 0.85854400  |
| H | -1.79343600 | -1.31576100 | 1.68367900  |
| C | -0.18513300 | -1.91649100 | 0.40996400  |
| H | -0.68251200 | -2.87967100 | 0.25259600  |
| C | 0.53916400  | -1.55980100 | -0.88365800 |
| H | 1.34622300  | -2.26499500 | -1.10172300 |
| H | -0.14452900 | -1.55555100 | -1.73503300 |
| N | 1.08394100  | -0.17272400 | -0.83792800 |
| N | 2.10030300  | -0.03626900 | -0.13699200 |
| N | 3.00777500  | 0.20082300  | 0.48528900  |
| H | 0.54554600  | -2.06235200 | 1.21572300  |
| H | 0.08060300  | 2.79896700  | -0.81811800 |

#### 1.5 Cartesian coordinates of 1(II)-INT

M06-2X/6-31+g(d,p)

|   |             |             |             |
|---|-------------|-------------|-------------|
| C | -2.24121400 | 0.24759400  | -0.31943000 |
| C | -0.49968400 | 0.46348200  | 1.32628300  |
| C | 0.06752100  | 0.97041000  | 0.01108200  |
| C | -1.14822700 | 1.19005300  | -0.89115200 |
| H | -2.65179800 | -0.42053600 | -1.08144600 |
| H | -3.06746300 | 0.83894900  | 0.08028600  |
| H | -0.96763000 | 1.31290900  | 1.83472000  |
| H | 0.26280200  | 0.03406300  | 1.98525500  |



|   |             |             |             |
|---|-------------|-------------|-------------|
| H | -1.43124600 | 2.24062900  | -0.77970000 |
| H | -0.91220400 | 1.01844000  | -1.94523400 |
| O | 0.97979900  | 1.97966700  | 0.14378400  |
| C | -1.55286100 | -0.53779000 | 0.82446600  |
| H | -2.25696800 | -0.81153500 | 1.61204700  |
| C | -0.85503500 | -1.80588700 | 0.30778900  |
| H | -1.59331400 | -2.54381000 | -0.02131300 |
| C | 0.04675500  | -1.50499300 | -0.88479800 |
| H | 0.75416300  | -2.30376800 | -1.11159400 |
| H | -0.51790100 | -1.27761200 | -1.79050800 |
| N | 0.83984500  | -0.25187300 | -0.62228000 |
| N | 1.98306000  | -0.42486100 | -0.08224600 |
| N | 3.01193000  | -0.50574600 | 0.33226000  |
| H | -0.26849000 | -2.26088300 | 1.11377700  |
| H | 1.06428100  | 2.47596700  | -0.68615100 |

## 1.6 Cartesian coordinates of 1(II)-TSS2

M06-2X/6-31+g(d,p)

|   |             |             |             |
|---|-------------|-------------|-------------|
| C | -2.31067900 | 0.10969900  | -0.16031000 |
| C | -0.44891300 | 0.37716900  | 1.33093700  |
| C | 0.01975000  | 0.93250100  | -0.00778400 |
| C | -1.33653500 | 1.13982700  | -0.78583500 |
| H | -2.74531900 | -0.55754500 | -0.90996600 |
| H | -3.13442000 | 0.64065600  | 0.32235100  |
| H | -0.91244800 | 1.19672300  | 1.88721000  |
| H | 0.38409700  | -0.02172800 | 1.91960000  |
| H | -1.60379600 | 2.17259200  | -0.54492700 |
| H | -1.23302700 | 1.06905100  | -1.87162100 |
| O | 0.83060400  | 2.03668300  | 0.13270500  |
| C | -1.47761700 | -0.66617600 | 0.88468600  |
| H | -2.08461200 | -1.02979600 | 1.71556000  |
| C | -0.73233800 | -1.83581800 | 0.22770600  |
| H | -1.42981700 | -2.61327700 | -0.09644400 |
| C | 0.03615200  | -1.34943100 | -0.99364500 |
| H | 0.77544900  | -2.04911200 | -1.38987900 |
| H | -0.63457600 | -1.13079500 | -1.84226300 |
| N | 0.68253600  | -0.04867500 | -0.85587100 |
| N | 2.16022000  | -0.39260100 | 0.06729200  |
| N | 3.23083300  | -0.46981900 | 0.29758400  |

|   |             |             |             |
|---|-------------|-------------|-------------|
| H | -0.03446900 | -2.29123900 | 0.94025200  |
| H | 0.99405700  | 2.45204500  | -0.72908300 |

### 1.7 Cartesian coordinates of lactam 1(II)

M06-2X/6-31+g(d,p)

|   |             |             |             |
|---|-------------|-------------|-------------|
| C | 0.56480100  | -0.32047200 | 1.55562500  |
| C | -0.33168600 | 1.49501200  | 0.03345200  |
| C | -1.09463300 | 0.29335800  | -0.34676000 |
| C | -0.05723100 | -1.44096700 | 0.67651500  |
| H | 1.44948400  | -0.70444400 | 2.06931400  |
| H | -0.14920700 | 0.00509700  | 2.31977800  |
| H | -0.92713400 | 2.10387000  | 0.71737000  |
| H | -0.07190200 | 2.10201400  | -0.84332800 |
| H | -0.94659900 | -1.89155200 | 1.11855100  |
| H | 0.64860400  | -2.23668300 | 0.43389600  |
| O | -2.35180800 | 0.22317900  | -0.09804000 |
| C | 0.96049100  | 0.86811300  | 0.65457300  |
| H | 1.48450200  | 1.63856500  | 1.22163400  |
| C | 1.80202800  | 0.32927200  | -0.50365000 |
| H | 2.61962200  | -0.28298300 | -0.11412900 |
| C | 0.85598900  | -0.51240800 | -1.39419600 |
| H | 0.58422300  | 0.01206600  | -2.31173900 |
| H | 1.28916000  | -1.47340500 | -1.67338000 |
| N | -0.41315700 | -0.83058000 | -0.68265300 |
| H | 2.23762100  | 1.14334300  | -1.08834500 |
| H | -2.71036900 | -0.65870100 | -0.34008600 |

### 1.8 Cartesian coordinates of ketoazide I (red pathway, Figure 1)

M06-2X/6-31+g(d,p)

|   |             |             |             |
|---|-------------|-------------|-------------|
| C | 1.79760100  | -0.17625700 | 1.18121800  |
| C | 1.35749300  | 0.54364800  | -1.09354100 |
| C | 0.51725900  | 1.32020500  | -0.16263600 |
| C | 0.77641200  | 0.97882800  | 1.25539800  |
| H | 1.57587900  | -0.96045300 | 1.90840100  |
| H | 2.79554000  | 0.20827400  | 1.40356100  |
| H | 2.24732500  | 1.18052300  | -1.24604100 |
| H | 0.89076800  | 0.37004800  | -2.06645200 |
| H | 1.14648100  | 1.87504300  | 1.76927700  |
| H | -0.16947700 | 0.71994200  | 1.74749400  |

|   |             |             |             |
|---|-------------|-------------|-------------|
| O | -0.24964500 | 2.29276500  | -0.47098200 |
| C | 1.75309800  | -0.70680100 | -0.27615000 |
| H | 2.74803200  | -1.03090500 | -0.58778700 |
| C | 0.80119100  | -1.89390500 | -0.48518700 |
| H | 1.24769500  | -2.77953800 | -0.02072000 |
| C | -0.58924900 | -1.73302400 | 0.10459000  |
| H | -1.20857500 | -2.60344900 | -0.13364500 |
| H | -0.54466100 | -1.62841400 | 1.19666600  |
| N | -1.20769600 | -0.51144600 | -0.48009600 |
| N | -2.30096400 | -0.21014100 | 0.01523600  |
| N | -3.29229200 | 0.14808300  | 0.41503500  |
| H | 0.71808000  | -2.10159300 | -1.55818800 |
| H | -0.32609300 | 2.42677900  | -1.43810600 |

### 1.9 Cartesian coordinates of 1(III)-TSS1

M06-2X/6-31+g(d,p)

|   |             |             |             |
|---|-------------|-------------|-------------|
| C | 1.82848200  | 0.06181400  | 1.15296200  |
| C | 1.23439300  | 0.68235700  | -1.11224900 |
| C | 0.25388000  | 1.27482500  | -0.17227900 |
| C | 0.62640200  | 1.02770200  | 1.24641100  |
| H | 1.76590400  | -0.74196500 | 1.89011900  |
| H | 2.75149200  | 0.61437800  | 1.34332300  |
| H | 1.99503000  | 1.46944200  | -1.25238600 |
| H | 0.80961700  | 0.42979100  | -2.08679000 |
| H | 0.87461300  | 1.99812900  | 1.69355300  |
| H | -0.22783500 | 0.64281000  | 1.81335000  |
| O | -0.63369100 | 2.15708200  | -0.45931100 |
| C | 1.83653200  | -0.48430500 | -0.29832700 |
| H | 2.86046200  | -0.66512300 | -0.63066100 |
| C | 1.05458600  | -1.79523800 | -0.46772700 |
| H | 1.61154800  | -2.60250400 | 0.01885100  |
| C | -0.34297100 | -1.78477500 | 0.12963000  |
| H | -0.88424600 | -2.70090400 | -0.12369400 |
| H | -0.30967200 | -1.68917500 | 1.22253200  |
| N | -1.06298800 | -0.61152800 | -0.43945600 |
| N | -2.19632300 | -0.41383000 | 0.02667600  |
| N | -3.22371200 | -0.13936100 | 0.39462600  |
| H | 0.99248700  | -2.04090500 | -1.53388900 |
| H | -0.73652800 | 2.28811400  | -1.42326600 |

### 1.10 Cartesian coordinates of 1(III)-INT

M06-2X/6-31+g(d,p)

|   |             |             |             |
|---|-------------|-------------|-------------|
| C | -1.82585400 | -0.38824900 | 1.12055400  |
| C | -1.03913400 | -0.81664000 | -1.11572100 |
| C | 0.16158400  | -0.90080200 | -0.19135800 |
| C | -0.42360000 | -1.04795200 | 1.21336100  |
| H | -1.95941000 | 0.41108600  | 1.85472400  |
| H | -2.59931500 | -1.13613700 | 1.30649600  |
| H | -1.47701600 | -1.81974000 | -1.16659000 |
| H | -0.77904300 | -0.47882500 | -2.12364300 |
| H | -0.49217800 | -2.11966000 | 1.41497000  |
| H | 0.22640700  | -0.61051700 | 1.97766100  |
| O | 1.16087800  | -1.79155300 | -0.47002200 |
| C | -1.94558600 | 0.14353800  | -0.33027400 |
| H | -2.97471700 | 0.11461500  | -0.69225100 |
| C | -1.40453400 | 1.57358200  | -0.47160500 |
| H | -2.05781200 | 2.28392900  | 0.04396000  |
| C | -0.01874600 | 1.72686100  | 0.14061100  |
| H | 0.49592400  | 2.62202300  | -0.21155400 |
| H | -0.04645900 | 1.72294200  | 1.23547400  |
| N | 0.80433000  | 0.54128900  | -0.29508600 |
| N | 2.02158500  | 0.56626500  | 0.07951500  |
| N | 3.10223900  | 0.56208800  | 0.34182700  |
| H | -1.37324400 | 1.85279100  | -1.52941100 |
| H | 1.22797200  | -1.93959700 | -1.42686900 |

### 1.11 Cartesian coordinates of 1(III)-TSS2

M06-2X/6-31+g(d,p)

|   |             |             |             |
|---|-------------|-------------|-------------|
| C | -1.81230900 | -0.35133200 | 1.20782300  |
| C | -1.17470400 | -0.77480600 | -1.07155900 |
| C | 0.13549100  | -0.82716300 | -0.20636600 |
| C | -0.38749100 | -0.96952300 | 1.22295900  |
| H | -1.92371000 | 0.44963500  | 1.94428600  |
| H | -2.55162100 | -1.11960300 | 1.44304800  |
| H | -1.53145000 | -1.81056200 | -1.07068300 |
| H | -1.00668800 | -0.44919500 | -2.10211500 |
| H | -0.40871300 | -2.03562900 | 1.45575000  |
| H | 0.29353200  | -0.48830400 | 1.93411300  |

|   |             |             |             |
|---|-------------|-------------|-------------|
| O | 1.04617200  | -1.80436700 | -0.54024900 |
| C | -2.03154600 | 0.16613400  | -0.23268900 |
| H | -3.08161300 | 0.14231300  | -0.53336300 |
| C | -1.46870600 | 1.57044300  | -0.43490400 |
| H | -1.99769700 | 2.32327900  | 0.15624700  |
| C | 0.00692000  | 1.63096500  | 0.05328700  |
| H | 0.50010700  | 2.53877400  | -0.29329000 |
| H | 0.01723000  | 1.57080800  | 1.14536500  |
| N | 0.68328000  | 0.48426500  | -0.54565300 |
| N | 2.25927900  | 0.45964500  | 0.22155700  |
| N | 3.34713900  | 0.56919200  | 0.32366000  |
| H | -1.52173300 | 1.85790900  | -1.48838100 |
| H | 1.20916900  | -1.80450600 | -1.49724100 |

### 1.12 Cartesian coordinates of lactam 1(III)

M06-2X/6-31+g(d,p)

|   |             |             |             |
|---|-------------|-------------|-------------|
| C | -0.11886800 | 1.65840600  | 0.28080500  |
| C | -0.36850000 | -0.62184500 | 1.30080100  |
| C | 1.16654500  | -0.21193500 | -0.32039500 |
| C | 0.80422800  | 1.09565700  | -0.87861100 |
| H | -0.63627000 | 2.52766700  | -0.13223300 |
| H | 0.51824000  | 1.99666800  | 1.10451500  |
| H | 0.41963900  | -0.40871100 | 2.02627500  |
| H | -1.02147800 | -1.40650700 | 1.68746900  |
| H | 1.67383700  | 1.72655600  | -1.05501100 |
| H | 0.21588300  | 0.99315500  | -1.79216900 |
| O | 2.34814400  | -0.36588200 | 0.16380200  |
| C | -1.12496000 | 0.60580800  | 0.77064600  |
| H | -1.77593600 | 1.03798700  | 1.53410400  |
| C | -1.90070700 | 0.00740000  | -0.41828700 |
| H | -2.09304800 | 0.75352300  | -1.19382900 |
| C | -0.97409900 | -1.12743900 | -0.92057700 |
| H | -1.43120900 | -2.11130200 | -0.80579900 |
| H | -0.64771900 | -1.02504700 | -1.95604400 |
| N | 0.21668400  | -1.13628100 | -0.01758200 |
| H | -2.86010500 | -0.39937200 | -0.09349900 |
| H | 2.43438600  | -1.23990300 | 0.60257500  |

### 1.13 Cartesian coordinates of 1(III)-INT-Conformer-B

M06-2X/6-311++g(d,p)

|   |             |             |             |
|---|-------------|-------------|-------------|
| C | 1.66199900  | 0.61020900  | 1.20315500  |
| C | 1.09688900  | 0.56199600  | -1.15385600 |
| C | -0.15117600 | 0.88749300  | -0.35365800 |
| C | 0.37122400  | 1.43061200  | 0.96814200  |
| H | 1.56608800  | -0.05471000 | 2.06197600  |
| H | 2.49606900  | 1.28228800  | 1.40294900  |
| H | 0.59141400  | 2.49087700  | 0.82277600  |
| O | -1.11762500 | 1.59429800  | -1.01452700 |
| C | 1.92167400  | -0.19799700 | -0.10464100 |
| H | 2.98169200  | -0.19770000 | -0.35007100 |
| C | 1.43321900  | -1.66052600 | -0.01071800 |
| H | 1.60203500  | -2.04295200 | 0.99683900  |
| C | -0.04196600 | -1.80827700 | -0.38861400 |
| H | -0.18429400 | -1.94633700 | -1.46063700 |
| H | -0.53744300 | -2.61587400 | 0.14785700  |
| N | -0.74101400 | -0.53365400 | -0.02398400 |
| N | -1.94597100 | -0.56397700 | 0.31547200  |
| N | -3.01225600 | -0.53849400 | 0.62086700  |
| H | 1.99774100  | -2.28971300 | -0.70147900 |
| H | -1.51153400 | 2.25711300  | -0.43178500 |
| H | 0.89452700  | 0.01618200  | -2.07643200 |
| H | 1.55542200  | 1.51983100  | -1.40924900 |
| H | -0.36721000 | 1.33842600  | 1.76813300  |

### 1.14 Cartesian coordinates of 1(III)-TSS2-Conformer-B

M06-2X/6-311++g(d,p)

|   |             |             |             |
|---|-------------|-------------|-------------|
| C | -1.82836700 | -0.54653500 | 1.19916000  |
| C | -1.25824500 | -0.52808300 | -1.09154900 |
| C | 0.09157100  | -0.81464300 | -0.33112600 |
| C | -0.34771300 | -0.96050400 | 1.14744700  |
| H | -2.08047400 | -0.01901700 | 2.11925100  |
| H | -2.47131900 | -1.42485000 | 1.11999800  |
| H | -0.17942900 | -1.99617000 | 1.43857700  |
| O | 0.82691200  | -1.91439000 | -0.71956500 |
| C | -1.97538400 | 0.33373800  | -0.04700700 |
| H | -3.01211500 | 0.52350100  | -0.32085300 |
| C | -1.20008700 | 1.66138700  | 0.16684800  |

|   |             |             |             |
|---|-------------|-------------|-------------|
| H | -1.00977900 | 1.81499100  | 1.23171200  |
| C | 0.11034500  | 1.67499000  | -0.60733400 |
| H | -0.04963900 | 1.88910700  | -1.67261300 |
| H | 0.81435100  | 2.43812100  | -0.27429100 |
| N | 0.81480800  | 0.38821600  | -0.69219300 |
| N | 2.14857800  | 0.42998500  | 0.40265000  |
| N | 3.19942800  | 0.38599400  | 0.69401900  |
| H | -1.77944900 | 2.51920700  | -0.17825300 |
| H | 1.04076900  | -1.85182200 | -1.66069300 |
| H | -1.13195300 | -0.09191800 | -2.08259200 |
| H | -1.72292500 | -1.51114400 | -1.19735600 |
| H | 0.27425400  | -0.32634500 | 1.78367800  |

## 2. Screening of functionals and basis sets.

**Table S2.** Energy barriers (in kcal mol<sup>-1</sup>)<sup>[a]</sup> and product distribution (%)<sup>[b]</sup> obtained using different levels of theory.

| Level of theory                   | $\Delta_{\text{rel}}G^\ddagger$ (TSS2 – INT)/kcal mol <sup>-1</sup> |             | Product distribution |            |
|-----------------------------------|---------------------------------------------------------------------|-------------|----------------------|------------|
|                                   | 1(II)                                                               | 1(III)      | 1(II)                | 1(III)     |
| <b>Experimental<sup>[c]</sup></b> | -                                                                   | -           | <b>76%</b>           | <b>24%</b> |
| M06-2X/6-31+G(d,p)                | 14.7                                                                | 15.1        | 66%                  | 34%        |
| <b>M06-2X/6-311++G(d,p)</b>       | <b>13.9</b>                                                         | <b>14.5</b> | <b>73%</b>           | <b>27%</b> |
| B3LYP/6-31+G(d,p)                 | 13.0                                                                | 15.7        | 99%                  | 1%         |
| B3LYP/6-311++G(d,p)               | 13.1                                                                | 15.7        | 99%                  | 1%         |
| $\omega$ B97X-D/6-31+G(d,p)       | 15.9                                                                | 17.3        | 91%                  | 9%         |
| $\omega$ B97X-D/6-311++G(d,p)     | 15.7                                                                | 17.2        | 93%                  | 7%         |

<sup>[a]</sup> Calculated using Gibbs free energies at 298.15 K

<sup>[b]</sup> Obtained from Boltzmann distributions based on  $\Delta_{\text{rel}}G^\ddagger$ .

<sup>[c]</sup> Tani, K.; Stoltz, B. M. *Nature* **2006**, *441* (7094), 731–734.

Following data were obtained using the most representative level of theory M06-2X/6-311++G(d,p).

## 3. Calculation data for system 1 (R<sub>1</sub>=H and R<sub>2</sub>=H) using M06-2X/6-311++G(d,p) level of theory.

### 3.1 Cartesian coordinates of 1(II)-INT.

M06-2X/6-311++G(d,p)

|   |             |            |             |
|---|-------------|------------|-------------|
| C | -2.23932500 | 0.24390100 | -0.31374400 |
| C | -0.49339000 | 0.46078100 | 1.32559900  |
| C | 0.06730500  | 0.97109100 | 0.01043900  |

|   |             |             |             |
|---|-------------|-------------|-------------|
| C | -1.15026700 | 1.18851200  | -0.88729600 |
| H | -2.64908000 | -0.42341200 | -1.07376800 |
| H | -3.06350500 | 0.83256400  | 0.08846300  |
| H | -0.96192300 | 1.30684100  | 1.83486300  |
| H | 0.27088600  | 0.03280900  | 1.98006100  |
| H | -1.43511200 | 2.23656100  | -0.77482600 |
| H | -0.91643700 | 1.01783400  | -1.93991500 |
| O | 0.97555200  | 1.98305600  | 0.14099400  |
| C | -1.54618300 | -0.54085100 | 0.82647300  |
| H | -2.24572400 | -0.81536400 | 1.61456800  |
| C | -0.84892300 | -1.80611900 | 0.30561500  |
| H | -1.58687200 | -2.54234800 | -0.02193200 |
| C | 0.04658400  | -1.50066700 | -0.88915000 |
| H | 0.75145900  | -2.29761900 | -1.12207700 |
| H | -0.52239300 | -1.27115600 | -1.78928000 |
| N | 0.84161800  | -0.24855400 | -0.62723800 |
| N | 1.98037200  | -0.42445600 | -0.08233400 |
| N | 2.99969400  | -0.50692900 | 0.33631900  |
| H | -0.26025100 | -2.26103000 | 1.10747700  |
| H | 1.04793500  | 2.47955700  | -0.68642700 |

### 3.2 Cartesian coordinates of 1(II)-TSS2.

M06-2X/6-311++G(d,p)

|   |             |             |             |
|---|-------------|-------------|-------------|
| C | -2.30607300 | 0.10710400  | -0.16041000 |
| C | -0.44606600 | 0.37756900  | 1.32973300  |
| C | 0.01933100  | 0.93437900  | -0.00800400 |
| C | -1.33333300 | 1.13867500  | -0.78471800 |
| H | -2.73734300 | -0.55989100 | -0.90901700 |
| H | -3.12876300 | 0.63504200  | 0.32250700  |
| H | -0.91349000 | 1.19413600  | 1.88333700  |
| H | 0.38533300  | -0.01815300 | 1.91870400  |
| H | -1.60712000 | 2.16865900  | -0.54818000 |
| H | -1.22747400 | 1.06407800  | -1.86797900 |
| O | 0.82949700  | 2.03877100  | 0.13099700  |
| C | -1.47192200 | -0.66725900 | 0.88375500  |
| H | -2.07693500 | -1.03068100 | 1.71297200  |
| C | -0.72654300 | -1.83539000 | 0.22684700  |
| H | -1.42393300 | -2.61026400 | -0.09731600 |
| C | 0.04023300  | -1.34873800 | -0.99408600 |



|   |             |             |             |
|---|-------------|-------------|-------------|
| H | 0.77632100  | -2.04861100 | -1.39082700 |
| H | -0.63124500 | -1.12879400 | -1.83967500 |
| N | 0.68970200  | -0.04962900 | -0.85288400 |
| N | 2.14895500  | -0.39239400 | 0.06764200  |
| N | 3.21157700  | -0.46978500 | 0.29936800  |
| H | -0.03024000 | -2.29032200 | 0.93821500  |
| H | 0.97351500  | 2.45925100  | -0.72830300 |

### 3.3 Cartesian coordinates of 1(III)-INT.

M06-2X/6-311++G(d,p)

|   |             |             |             |
|---|-------------|-------------|-------------|
| C | -1.82330900 | -0.38503800 | 1.12124200  |
| C | -1.03826900 | -0.81680500 | -1.11355100 |
| C | 0.16165200  | -0.90129600 | -0.19064500 |
| C | -0.42240800 | -1.04625000 | 1.21340700  |
| H | -1.95391800 | 0.41491500  | 1.85187400  |
| H | -2.59588000 | -1.13036700 | 1.30874700  |
| H | -1.47619900 | -1.81803100 | -1.16138200 |
| H | -0.77855000 | -0.48091900 | -2.11988600 |
| H | -0.49376200 | -2.11563900 | 1.41565800  |
| H | 0.22702800  | -0.60962200 | 1.97559400  |
| O | 1.15850100  | -1.79318600 | -0.47086800 |
| C | -1.94363200 | 0.14382600  | -0.32958700 |
| H | -2.97064000 | 0.11411500  | -0.69021700 |
| C | -1.40252600 | 1.57242600  | -0.47334200 |
| H | -2.05485100 | 2.28214200  | 0.04032500  |
| C | -0.01779600 | 1.72552000  | 0.13823100  |
| H | 0.49554900  | 2.61920200  | -0.21447900 |
| H | -0.04566700 | 1.72328500  | 1.23130600  |
| N | 0.80616400  | 0.54027900  | -0.29499500 |
| N | 2.02087800  | 0.56617200  | 0.08062200  |
| N | 3.09460400  | 0.56297700  | 0.34148900  |
| H | -1.37118400 | 1.84857300  | -1.52991500 |
| H | 1.21627600  | -1.94245800 | -1.42501700 |

### 3.4 Cartesian coordinates of 1(III)-TSS2

M06-2X/6-311++G(d,p)

|   |             |             |             |
|---|-------------|-------------|-------------|
| C | -1.80528500 | -0.34549600 | 1.21129400  |
| C | -1.17394000 | -0.78169800 | -1.06578600 |
| C | 0.13530700  | -0.82881500 | -0.20627800 |

|   |             |             |             |
|---|-------------|-------------|-------------|
| C | -0.38071200 | -0.96290800 | 1.22519800  |
| H | -1.91434700 | 0.45782800  | 1.94214300  |
| H | -2.54183800 | -1.11212500 | 1.45078900  |
| H | -1.53460700 | -1.81402100 | -1.05797000 |
| H | -1.00784200 | -0.46132600 | -2.09617600 |
| H | -0.40243000 | -2.02564100 | 1.46385700  |
| H | 0.30093600  | -0.47831200 | 1.93001300  |
| O | 1.04669400  | -1.80518500 | -0.53952400 |
| C | -2.02796000 | 0.16415800  | -0.23060100 |
| H | -3.07657500 | 0.13973000  | -0.52727100 |
| C | -1.46496300 | 1.56641300  | -0.44044000 |
| H | -1.99549900 | 2.32048000  | 0.14422400  |
| C | 0.00817100  | 1.63125700  | 0.04827300  |
| H | 0.49895400  | 2.53773700  | -0.29959100 |
| H | 0.01898000  | 1.57386600  | 1.13865300  |
| N | 0.68598900  | 0.48428500  | -0.54780800 |
| N | 2.25027100  | 0.46198400  | 0.21468300  |
| N | 3.32950400  | 0.56982300  | 0.32851900  |
| H | -1.51682500 | 1.84560000  | -1.49421600 |
| H | 1.19347400  | -1.81245300 | -1.49598300 |

**4. Calculation data for systems 2 ( $R_1=\text{SCH}_3$  and  $R_2=\text{H}$ ) and 3 ( $R_1=\text{H}$  and  $R_2=\text{SCH}_3$ ) using M06-2X/6-311++G(d,p) level of theory.**

#### 4.1. IRCs.

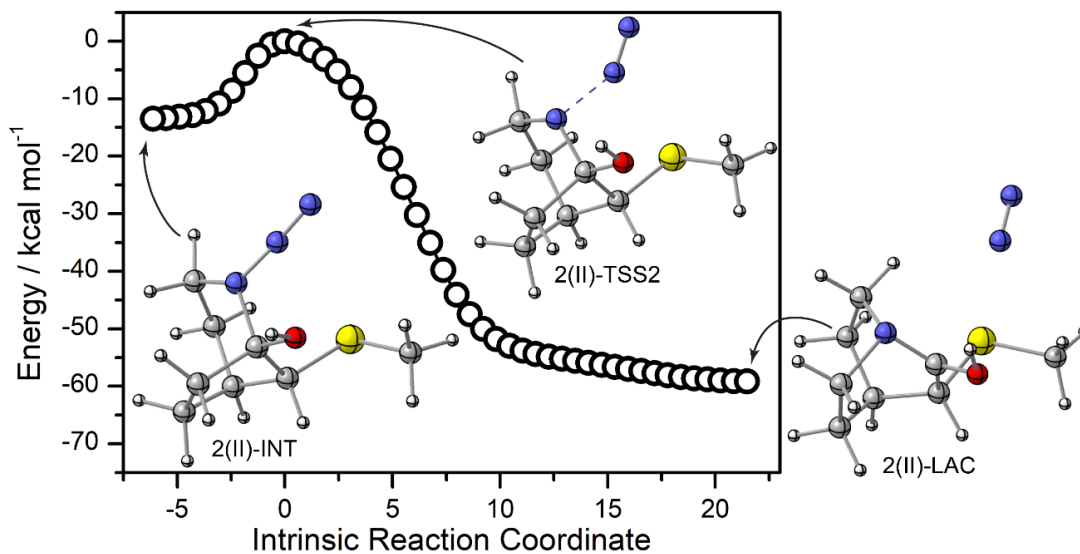

**Figure S3.** Optimized geometries for the formation of 2(II) from 2(II)-INT and and IRC plot obtained using M06-2X/6-311++G(d,p) level of theory.

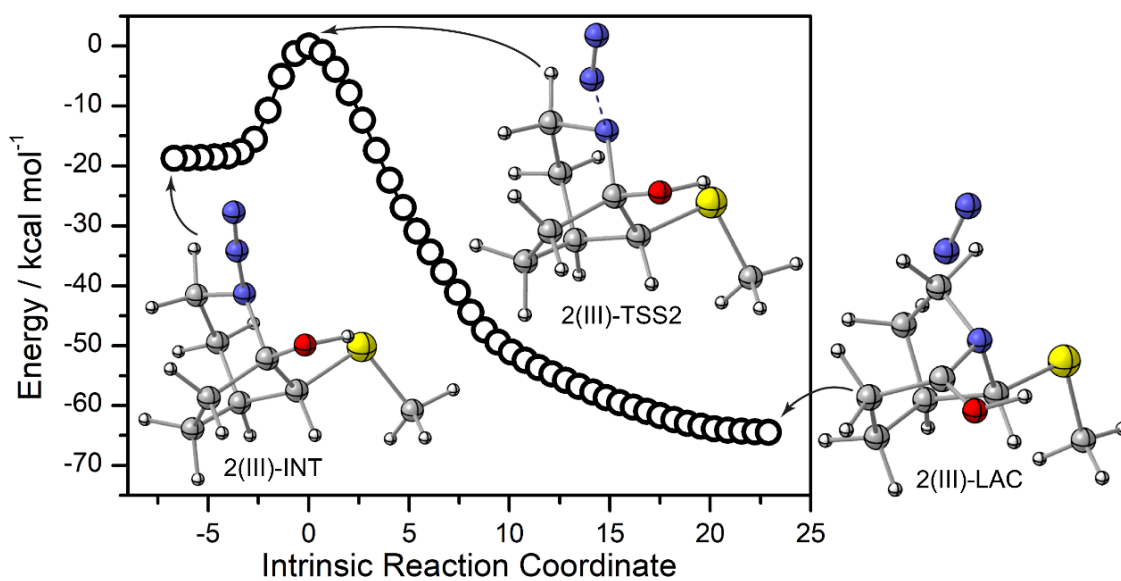

**Figure S4.** Optimized geometries for the formation of 2(III) from 2(III)-INT and and IRC plot obtained using M06-2X/6-311++G(d,p) level of theory.

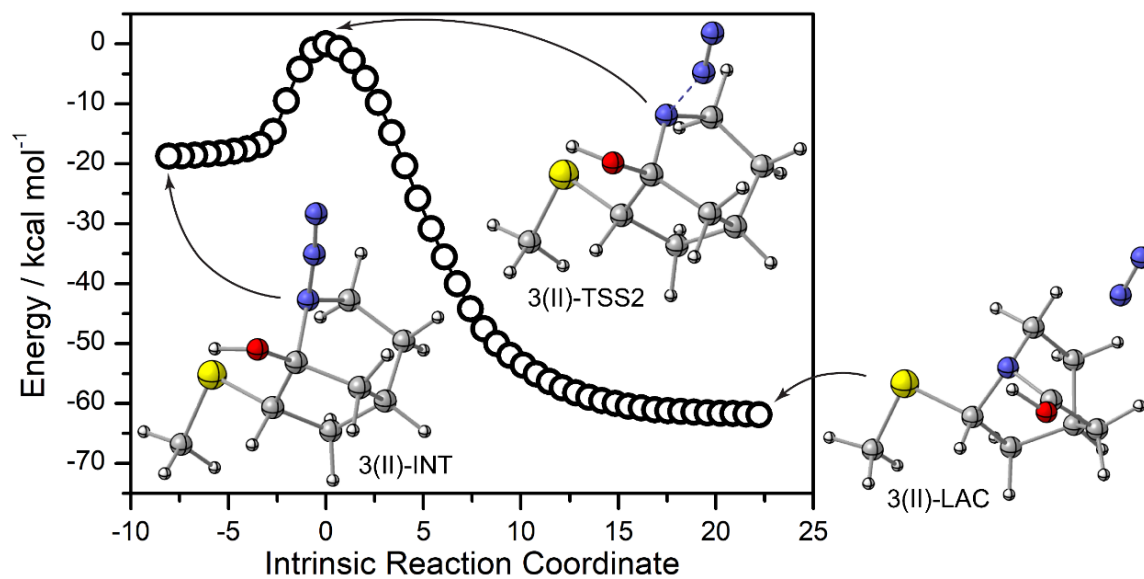

**Figure S5.** Optimized geometries for the formation of 3(II) from 3(II)-INT and IRC plot obtained using M06-2X/6-311++G(d,p) level of theory.

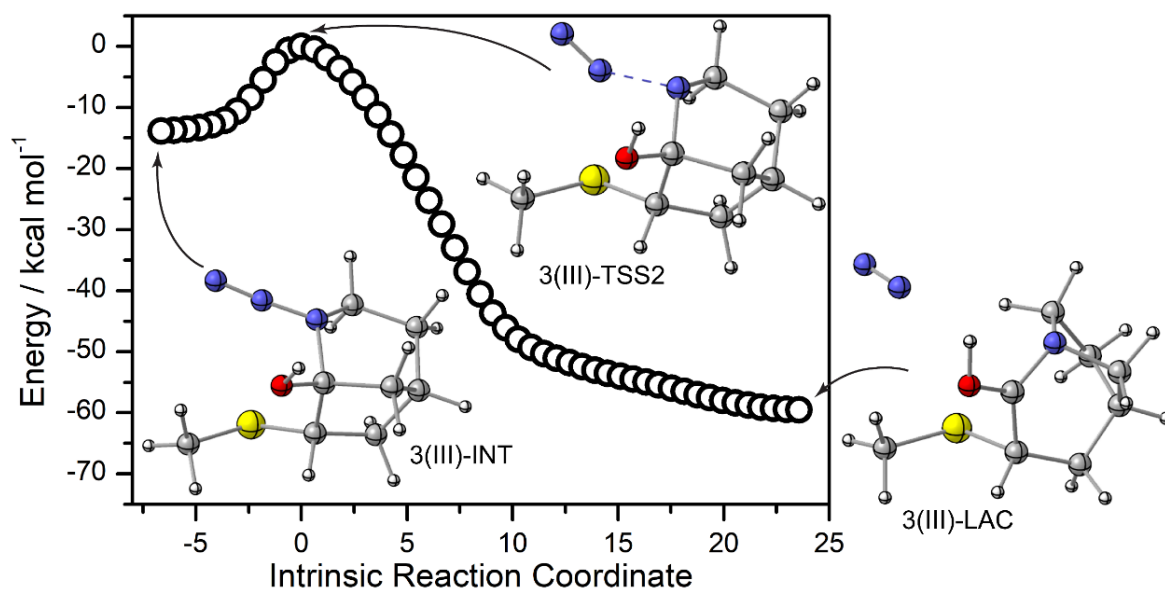

**Figure S6.** Optimized geometries for the formation of 3(III) from 3(III)-INT and IRC plot obtained using M06-2X/6-311++G(d,p) level of theory.

## 4.2 NBO analysis

**Table S3.** Total donor-acceptor interactions of type  $n(S) \leftrightarrow \sigma^*, \pi^*(N-N)$  (in  $\text{kcal mol}^{-1}$ ) of system 2 ( $R_1=\text{SCH}_3$ ,  $R_2=\text{H}$ ) and system 3 ( $R_1=\text{H}$ ,  $R_2=\text{SCH}_3$ ) obtained by NBO calculations at M06-2X/6-311++G(d,p) level of theory.

| Structure       | $\sum n(S) \leftrightarrow \sigma^*, \pi^*(N-N)$ kcal mol <sup>-1</sup> |
|-----------------|-------------------------------------------------------------------------|
| <b>System 2</b> |                                                                         |
| 2(II)-INT       | 1.1                                                                     |
| 2(II)-TSS2      | 23.3                                                                    |
| 2(III)-INT      | 0.7                                                                     |
| 2(III)-TSS2     | 1.2                                                                     |
| <b>System 3</b> |                                                                         |
| 3(II)-INT       | 0.0                                                                     |
| 3(II)-TSS2      | 1.8                                                                     |
| 3(III)-INT      | 1.3                                                                     |
| 3(III)-TSS2     | 26.0                                                                    |

### 4.3 NCI

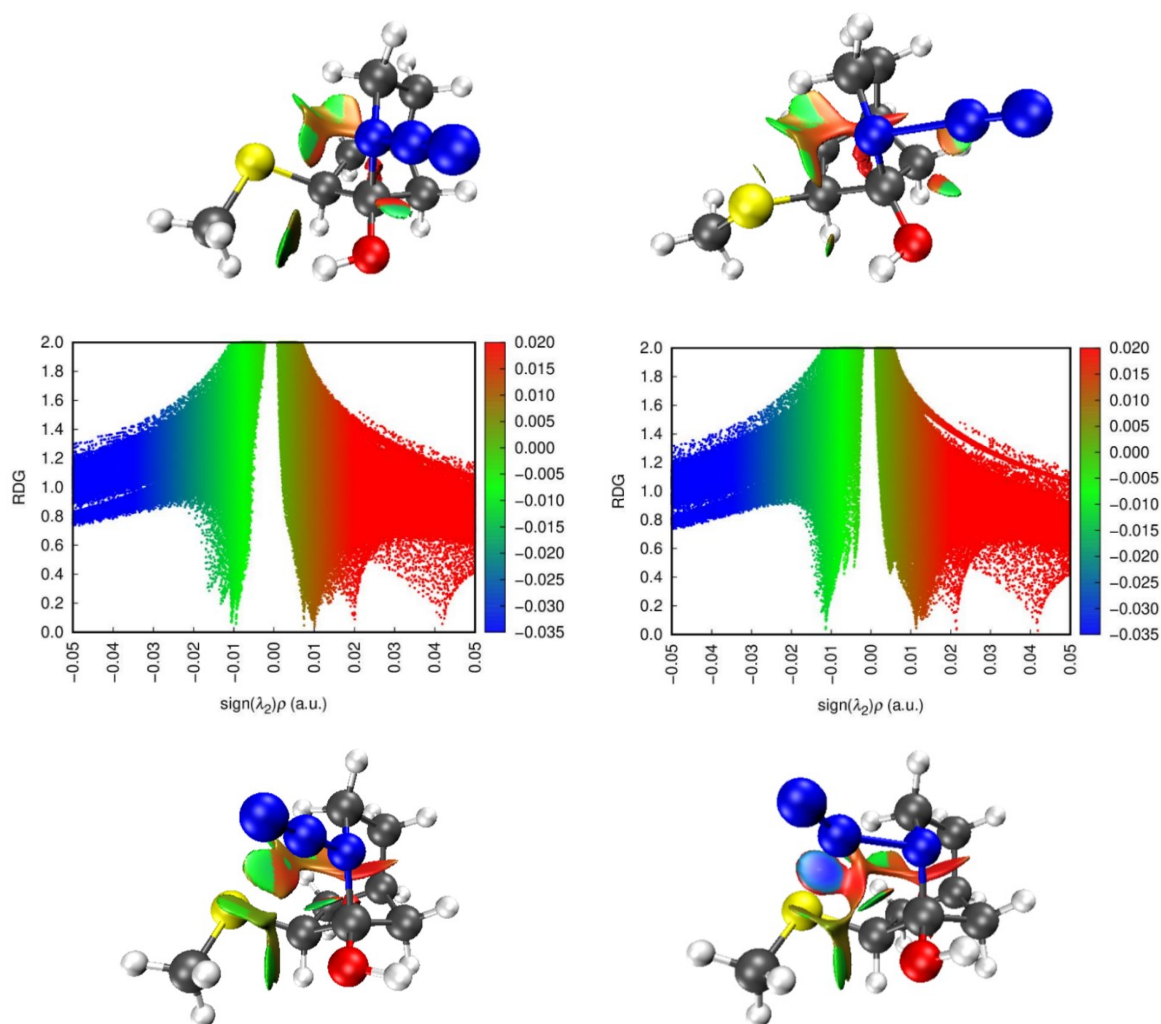

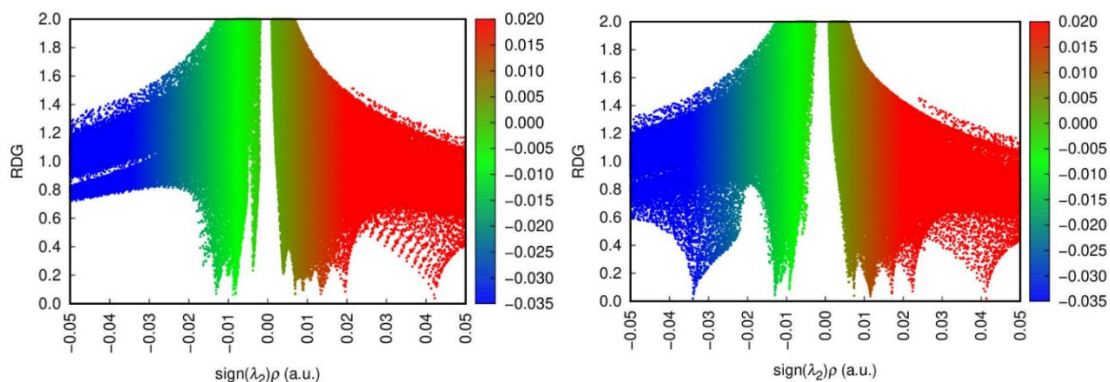

**Figure S7.** NCI isosurfaces for 3(II)-INT (top left), 3(II)-TSS2 (top right), 3(III)-INT (bottom left) and 3(III)-TSS2 (bottom right) obtained at M06-2X/6-311++G(d,p) level of theory using a blue-green-red color scale from  $-0.04 < \text{sign}(\lambda_2)\rho < 0.04$  a.u. Plots of the reduced density gradient and  $\text{sign}(\lambda_2)\rho$  are shown right under each correlated NCI isosurface obtained at the same level of theory.

#### 4.4 Cartesian coordinates of 2(II)-INT

M06-2X/6-311++G(d,p)

|   |             |             |             |
|---|-------------|-------------|-------------|
| C | -2.31188600 | -1.17368800 | 0.45033700  |
| C | 0.05719100  | -1.09062500 | 0.10597100  |
| C | -0.29683100 | 0.09204800  | 1.01216400  |
| C | -1.69733900 | -0.24322800 | 1.53052500  |
| H | -3.26789600 | -0.79881100 | 0.08186100  |
| H | -2.48243200 | -2.16525100 | 0.86843200  |
| H | 0.20293400  | -1.95443800 | 0.76265000  |
| H | -1.56533100 | -0.76954000 | 2.47748200  |
| H | -2.28159600 | 0.65813300  | 1.72404500  |
| O | 0.67840300  | 0.40561300  | 1.92081500  |
| C | -1.25880200 | -1.25248000 | -0.67900300 |
| H | -1.28444000 | -2.20783700 | -1.20080900 |
| C | -1.43073700 | -0.11309500 | -1.69445800 |
| H | -2.36850900 | -0.24524300 | -2.23890500 |
| C | -1.49351600 | 1.24943900  | -1.01100200 |
| H | -1.31125600 | 2.08051900  | -1.69039700 |
| H | -2.44519000 | 1.41371800  | -0.50569000 |
| N | -0.47310900 | 1.32773800  | 0.08892000  |
| N | 0.60208300  | 1.96091500  | -0.15706100 |
| N | 1.50113600  | 2.59276000  | -0.27845200 |
| H | -0.62241500 | -0.12960300 | -2.42940600 |

|   |            |             |             |
|---|------------|-------------|-------------|
| H | 0.29292300 | 0.85174000  | 2.68803200  |
| S | 1.53122800 | -0.90523600 | -0.93345300 |
| C | 2.84074700 | -1.24977700 | 0.27906300  |
| H | 2.65694000 | -2.20905400 | 0.76312600  |
| H | 3.77050300 | -1.31044000 | -0.28656800 |
| H | 2.91514700 | -0.45647200 | 1.01944100  |

#### 4.5 Cartesian coordinates of 2(II)-TSS2

M06-2X/6-311++G(d,p)

|   |             |             |             |
|---|-------------|-------------|-------------|
| C | -2.47523700 | -1.00571400 | 0.11087500  |
| C | -0.09560100 | -1.07003800 | -0.08546500 |
| C | -0.38853200 | 0.01024600  | 1.00277900  |
| C | -1.87202300 | -0.35489700 | 1.37732000  |
| H | -3.37031500 | -0.48543000 | -0.23210600 |
| H | -2.75305100 | -2.03766400 | 0.32443600  |
| H | -0.05543200 | -2.02627300 | 0.44229000  |
| H | -1.75977300 | -1.06538600 | 2.19783000  |
| H | -2.42474400 | 0.50835900  | 1.74838400  |
| O | 0.53479600  | -0.06383000 | 2.02718300  |
| C | -1.35784000 | -0.95834800 | -0.95086600 |
| H | -1.42292700 | -1.77557900 | -1.66755200 |
| C | -1.35651500 | 0.39166700  | -1.67951000 |
| H | -2.27045100 | 0.49727900  | -2.26675200 |
| C | -1.30640800 | 1.54370300  | -0.67478900 |
| H | -1.03726300 | 2.50496100  | -1.11233100 |
| H | -2.28729100 | 1.69720200  | -0.20091000 |
| N | -0.45631200 | 1.33990300  | 0.49892800  |
| N | 1.18293300  | 1.62831900  | -0.06569000 |
| N | 1.95622900  | 2.40729700  | -0.05885900 |
| H | -0.51797100 | 0.45989500  | -2.37813700 |
| H | 0.31089100  | 0.57465300  | 2.71881200  |
| S | 1.44219900  | -0.84610800 | -0.97600500 |
| C | 2.64793700  | -1.48696900 | 0.21663100  |
| H | 2.31555900  | -2.45508900 | 0.59064100  |
| H | 3.58383300  | -1.60811400 | -0.32788000 |
| H | 2.78075700  | -0.78697100 | 1.03939800  |

#### 4.6 Cartesian coordinates of 2(II)

M06-2X/6-311++G(d,p)

|   |             |             |             |
|---|-------------|-------------|-------------|
| C | -1.94054300 | -0.13036400 | 1.33195900  |
| C | 0.45498100  | -0.10589200 | 0.74611700  |
| C | -0.00445300 | 0.98514000  | -0.12672800 |
| C | -2.24332500 | 0.87695700  | 0.19024900  |
| H | -2.81899900 | -0.74389600 | 1.53279000  |
| H | -1.68746800 | 0.40283800  | 2.25138600  |
| H | 0.83889000  | 0.27613600  | 1.69432100  |
| H | -2.32798200 | 1.90260200  | 0.54722600  |
| H | -3.15100100 | 0.63018500  | -0.35896800 |
| O | 0.56985200  | 2.12530600  | -0.10389300 |
| C | -0.76686900 | -1.03287700 | 0.90444600  |
| H | -0.54873900 | -1.78957100 | 1.65594800  |
| C | -1.12097600 | -1.66455000 | -0.44766900 |
| H | -2.07991600 | -2.17531300 | -0.35210400 |
| C | -1.19957600 | -0.53823000 | -1.50162600 |
| H | -0.38008400 | -0.58931700 | -2.21691000 |
| H | -2.13639700 | -0.55531400 | -2.05676600 |
| N | -1.14470400 | 0.81881800  | -0.87233400 |
| H | -0.38303000 | -2.41094900 | -0.74511200 |
| H | 0.15751100  | 2.72092800  | -0.76584400 |
| S | 1.84273800  | -0.87088400 | -0.19287000 |
| C | 3.17305600  | 0.28510900  | 0.22682600  |
| H | 3.26745600  | 0.37748200  | 1.30844700  |
| H | 4.08386600  | -0.15786800 | -0.17786900 |
| H | 3.02243400  | 1.26028400  | -0.23459100 |

#### 4.7 Cartesian coordinates of 2(III)-INT

M06-2X/6-311++G(d,p)

|   |             |             |             |
|---|-------------|-------------|-------------|
| C | 0.30243700  | 2.23986600  | 0.94377800  |
| C | -0.96636700 | 0.28328300  | 0.42536200  |
| C | 0.41432700  | -0.18988700 | 0.86147800  |
| C | 1.03161200  | 1.01425100  | 1.56288000  |
| H | 1.00256200  | 2.96753200  | 0.53080300  |
| H | -0.28524100 | 2.74383400  | 1.71063700  |
| H | -1.54323800 | 0.39833500  | 1.34901400  |
| H | 0.82027100  | 0.90893200  | 2.62734400  |
| H | 2.11557400  | 1.03838100  | 1.43696700  |
| O | 0.49704600  | -1.36584400 | 1.53780500  |
| C | -0.63529800 | 1.67314900  | -0.15166400 |



|   |             |             |             |
|---|-------------|-------------|-------------|
| H | -1.53569900 | 2.27431400  | -0.27211800 |
| C | 0.07356200  | 1.54288400  | -1.50386000 |
| H | 0.28771000  | 2.53450200  | -1.90774500 |
| C | 1.40412700  | 0.81292100  | -1.38462900 |
| H | 1.76468900  | 0.44769600  | -2.34487100 |
| H | 2.17245600  | 1.42696900  | -0.90758600 |
| N | 1.17841000  | -0.38764300 | -0.50691700 |
| N | 2.14376000  | -1.20812100 | -0.43433100 |
| N | 2.93911000  | -1.97358400 | -0.37901300 |
| H | -0.57172000 | 1.02345300  | -2.21436100 |
| H | -0.21081600 | -1.95560700 | 1.22431100  |
| S | -1.81285900 | -0.96054300 | -0.59345500 |
| C | -3.50419800 | -0.76195000 | 0.03953200  |
| H | -3.86404300 | 0.24869200  | -0.14889700 |
| H | -4.12661400 | -1.46862700 | -0.50895100 |
| H | -3.54669100 | -0.99464000 | 1.10285800  |

#### 4.8 Cartesian coordinates of 2(III)-TSS2

M06-2X/6-311++G(d,p)

|   |             |             |             |
|---|-------------|-------------|-------------|
| C | 0.10101700  | 2.22259100  | 0.98103400  |
| C | -1.01826900 | 0.19621400  | 0.40710300  |
| C | 0.47646700  | -0.18689000 | 0.75209800  |
| C | 0.96894200  | 1.04319300  | 1.50749300  |
| H | 0.70962900  | 3.03561800  | 0.58245700  |
| H | -0.50072200 | 2.62805300  | 1.79379400  |
| H | -1.49980400 | 0.19561700  | 1.39088300  |
| H | 0.80475800  | 0.86178400  | 2.56889500  |
| H | 2.04279500  | 1.18755400  | 1.35622500  |
| O | 0.62168100  | -1.36196400 | 1.44201900  |
| C | -0.82318900 | 1.62386800  | -0.10626600 |
| H | -1.77344900 | 2.15258900  | -0.18868300 |
| C | -0.14131000 | 1.56414600  | -1.46588100 |
| H | 0.06623100  | 2.56139200  | -1.85795400 |
| C | 1.25420000  | 0.87766900  | -1.34478500 |
| H | 1.64310000  | 0.61837200  | -2.32721400 |
| H | 1.93053700  | 1.55038600  | -0.81454800 |
| N | 1.01422400  | -0.34275700 | -0.60167800 |
| N | 2.60474200  | -1.01790500 | -0.29820500 |
| N | 3.45713700  | -1.69006300 | -0.40274200 |

|   |             |             |             |
|---|-------------|-------------|-------------|
| H | -0.75290000 | 1.02446500  | -2.18886900 |
| H | 0.05445100  | -2.03914400 | 1.03803500  |
| S | -1.84841700 | -1.05758600 | -0.60562600 |
| C | -3.50668500 | -0.96113800 | 0.12687000  |
| H | -3.94660700 | 0.02091600  | -0.04047400 |
| H | -4.11200200 | -1.71397800 | -0.37813100 |
| H | -3.46454900 | -1.18937600 | 1.19182100  |

#### 4.9 Cartesian coordinates of 2(III)

M06-2X/6-311++G(d,p)

|   |             |             |             |
|---|-------------|-------------|-------------|
| C | -1.31200300 | -0.93201500 | 1.39919200  |
| C | 0.49231600  | 0.33064900  | 0.23190500  |
| C | -1.67762600 | 0.80872900  | -0.15790300 |
| C | -2.41700600 | -0.29276300 | 0.46673000  |
| H | -1.68771400 | -1.91089600 | 1.69828700  |
| H | -1.21203000 | -0.31508800 | 2.29484800  |
| H | 0.39733000  | 1.08464400  | 1.01730100  |
| H | -3.27793500 | 0.05850700  | 1.02993100  |
| H | -2.72752000 | -1.02502400 | -0.27809600 |
| O | -1.94097100 | 2.01273200  | 0.18763300  |
| C | 0.04263600  | -1.07113400 | 0.68584300  |
| H | 0.76533200  | -1.53016500 | 1.36083200  |
| C | -0.11454800 | -1.82297500 | -0.64520300 |
| H | -0.85877000 | -2.61615200 | -0.56627400 |
| C | -0.54608500 | -0.71832900 | -1.63560800 |
| H | 0.16968600  | -0.58629200 | -2.44459400 |
| H | -1.52910000 | -0.86672000 | -2.07924200 |
| N | -0.53986800 | 0.56952300  | -0.86880200 |
| H | 0.82866500  | -2.26649700 | -0.95981900 |
| H | -1.31339600 | 2.63806800  | -0.23197500 |
| S | 2.14298600  | 0.48529000  | -0.51059100 |
| C | 3.11201800  | 0.20098200  | 0.99744900  |
| H | 3.02140400  | -0.82880400 | 1.33986100  |
| H | 4.15112300  | 0.39580000  | 0.73218500  |
| H | 2.81377500  | 0.89660200  | 1.78232000  |

#### 4.10 Cartesian coordinates of 3(II)-INT

M06-2X/6-311++G(d,p)

|   |             |             |            |
|---|-------------|-------------|------------|
| C | -0.17153300 | -2.11699700 | 0.25337400 |
|---|-------------|-------------|------------|

|   |             |             |             |
|---|-------------|-------------|-------------|
| C | 1.24105800  | -0.58535800 | 1.47232300  |
| C | 0.13406200  | 0.23911600  | 0.83866400  |
| C | -0.95595300 | -0.80097100 | 0.51707100  |
| H | -0.33551400 | -2.50136200 | -0.75628200 |
| H | -0.51473100 | -2.88075600 | 0.95012500  |
| H | 0.89325600  | -0.89902200 | 2.45997100  |
| H | 2.17320900  | -0.02653700 | 1.58613100  |
| H | -1.52288700 | -0.89366800 | 1.44752300  |
| O | -0.22282100 | 1.34002000  | 1.56790200  |
| C | 1.31814900  | -1.77231100 | 0.50091500  |
| H | 1.85793000  | -2.61206700 | 0.93504500  |
| C | 2.02383000  | -1.32593900 | -0.78658300 |
| H | 2.12828100  | -2.16536600 | -1.47834800 |
| C | 1.23685400  | -0.24295500 | -1.51467300 |
| H | 1.83317800  | 0.30565700  | -2.24275500 |
| H | 0.35086700  | -0.63037700 | -2.01531100 |
| N | 0.69501100  | 0.75555500  | -0.52526100 |
| N | 1.32732700  | 1.84997200  | -0.42055000 |
| N | 1.80922400  | 2.84174000  | -0.33403900 |
| H | 3.02683800  | -0.96360600 | -0.54584400 |
| H | -1.12831600 | 1.61084400  | 1.36476200  |
| S | -2.13950700 | -0.42045000 | -0.80489700 |
| C | -3.09511400 | 0.93008600  | -0.05490600 |
| H | -4.02580200 | 1.00141000  | -0.61834500 |
| H | -3.34196300 | 0.68890600  | 0.98108600  |
| H | -2.58872000 | 1.89409200  | -0.13077600 |

#### 4.11 Cartesian coordinates of 3(II)-TSS2

M06-2X/6-311++G(d,p)

|   |             |             |             |
|---|-------------|-------------|-------------|
| C | 1.05852400  | 1.60123900  | 0.35797000  |
| C | -0.97627700 | 0.84527700  | 1.42519300  |
| C | -0.39287800 | -0.37439100 | 0.72545000  |
| C | 1.10751100  | 0.06455500  | 0.54470500  |
| H | 1.42892100  | 1.90533000  | -0.62387900 |
| H | 1.69419300  | 2.07150400  | 1.10872000  |
| H | -0.57693000 | 0.87096900  | 2.44034800  |
| H | -2.06725600 | 0.80215100  | 1.47344000  |
| H | 1.51161500  | -0.18437800 | 1.53008700  |
| O | -0.58158200 | -1.54615100 | 1.41525200  |
| C | -0.42866200 | 1.98570800  | 0.55708300  |

|   |             |             |             |
|---|-------------|-------------|-------------|
| H | -0.54684400 | 2.95614200  | 1.03580100  |
| C | -1.16989000 | 1.96417700  | -0.78453700 |
| H | -0.81645600 | 2.76253000  | -1.44028700 |
| C | -0.92368000 | 0.63608400  | -1.48368000 |
| H | -1.55888500 | 0.42170100  | -2.34450600 |
| H | 0.10878200  | 0.57280800  | -1.88557200 |
| N | -0.88152300 | -0.53946200 | -0.64661600 |
| N | -2.59150700 | -0.96591900 | -0.34060200 |
| N | -3.51346800 | -1.54630400 | -0.38365200 |
| H | -2.24376600 | 2.10903200  | -0.63227600 |
| H | -0.02551200 | -2.24527000 | 1.03879100  |
| S | 2.04119200  | -0.93778700 | -0.65773600 |
| C | 3.70352200  | -0.43355900 | -0.13555800 |
| H | 4.40890600  | -0.97508700 | -0.76543600 |
| H | 3.84211700  | 0.63707900  | -0.28436900 |
| H | 3.87117000  | -0.70344700 | 0.90723100  |

#### 4.12 Cartesian coordinates of 3(II)

M06-2X/6-311++G(d,p)

|   |             |             |             |
|---|-------------|-------------|-------------|
| C | -0.41129600 | -0.73146500 | -1.44275800 |
| C | -2.39274100 | 0.07366200  | -0.07844400 |
| C | -1.34155200 | 1.06419300  | 0.21392300  |
| C | 0.56027200  | 0.22368000  | -0.68757000 |
| H | 0.12474200  | -1.61474700 | -1.79404600 |
| H | -0.80934300 | -0.21524100 | -2.31972400 |
| H | -3.06006700 | 0.46499200  | -0.84714000 |
| H | -2.98455600 | -0.15820700 | 0.81414600  |
| H | 0.72949500  | 1.15371800  | -1.22921700 |
| O | -1.46760400 | 2.27225800  | -0.19763900 |
| C | -1.55206600 | -1.17140400 | -0.50269100 |
| H | -2.20521600 | -1.88579200 | -1.00019400 |
| C | -0.92417600 | -1.74972500 | 0.76529900  |
| H | -0.16251600 | -2.48545600 | 0.50133000  |
| C | -0.29721000 | -0.56569800 | 1.53298500  |
| H | -0.91875500 | -0.24660400 | 2.36919700  |
| H | 0.69261700  | -0.79997300 | 1.91898900  |
| N | -0.13936700 | 0.62425300  | 0.65215900  |
| H | -1.67330800 | -2.24013600 | 1.38811300  |
| H | -0.66988300 | 2.79833100  | 0.01537400  |
| S | 2.14931500  | -0.54252500 | -0.36802900 |

|   |            |            |             |
|---|------------|------------|-------------|
| C | 2.98532400 | 0.85607300 | 0.42313000  |
| H | 3.99928600 | 0.52907100 | 0.65262000  |
| H | 3.02870300 | 1.70781100 | -0.25631700 |
| H | 2.47683100 | 1.12889500 | 1.34809100  |

#### 4.13 Cartesian coordinates of 3(III)-INT

M06-2X/6-311++G(d,p)

|   |             |             |             |
|---|-------------|-------------|-------------|
| C | 1.10403300  | -1.74416400 | -0.42964200 |
| C | 1.65768500  | -0.28202400 | 1.41975600  |
| C | 0.24342400  | 0.04647600  | 0.98226200  |
| C | -0.20242500 | -1.21522600 | 0.22183800  |
| H | 1.06273800  | -1.71512800 | -1.52105000 |
| H | 1.25389700  | -2.78350100 | -0.14055700 |
| H | 1.58738400  | -1.05191800 | 2.19279700  |
| H | 2.19052800  | 0.58518600  | 1.81589400  |
| H | -0.54693200 | -1.90641700 | 0.99466300  |
| O | -0.66684100 | 0.45340200  | 1.92204800  |
| C | 2.24334100  | -0.84462400 | 0.11645500  |
| H | 3.15486500  | -1.41149000 | 0.29723300  |
| C | 2.55394400  | 0.32656700  | -0.82363800 |
| H | 3.01940700  | -0.03295800 | -1.74404700 |
| C | 1.29450700  | 1.07686100  | -1.23525000 |
| H | 1.51155100  | 2.08325200  | -1.59051600 |
| H | 0.72399700  | 0.53428200  | -1.99202100 |
| N | 0.41499800  | 1.22393700  | -0.02120800 |
| N | -0.65465700 | 1.88900100  | -0.21584500 |
| N | -1.53765800 | 2.54518200  | -0.32069000 |
| H | 3.25461400  | 1.00861700  | -0.33767900 |
| H | -0.22075200 | 0.93096600  | 2.63560100  |
| S | -1.55352700 | -1.00801600 | -0.96880100 |
| C | -2.98074000 | -0.84413000 | 0.14431500  |
| H | -3.86479200 | -0.83607700 | -0.49348200 |
| H | -3.03131000 | -1.70519600 | 0.81066600  |
| H | -2.94544000 | 0.07617200  | 0.72457000  |

#### 4.14 Cartesian coordinates of 3(III)-TSS2

M06-2X/6-311++G(d,p)

|   |            |             |             |
|---|------------|-------------|-------------|
| C | 1.27672300 | -1.63422000 | -0.51651000 |
| C | 1.82742100 | -0.17300300 | 1.32154000  |

|   |             |             |             |
|---|-------------|-------------|-------------|
| C | 0.33963900  | 0.12407100  | 0.95648300  |
| C | -0.03223000 | -1.18889500 | 0.18676800  |
| H | 1.19095900  | -1.61404800 | -1.60555300 |
| H | 1.50236500  | -2.66021200 | -0.22879500 |
| H | 1.77601400  | -0.95747500 | 2.08126000  |
| H | 2.34381100  | 0.69669800  | 1.73041100  |
| H | -0.32454100 | -1.89430700 | 0.96679400  |
| O | -0.52841300 | 0.30840400  | 2.01704900  |
| C | 2.36794500  | -0.66019800 | -0.01646700 |
| H | 3.33697400  | -1.14790100 | 0.08768000  |
| C | 2.49043200  | 0.56691000  | -0.91455100 |
| H | 2.85169000  | 0.31125900  | -1.91262700 |
| C | 1.10469800  | 1.22009200  | -1.10879800 |
| H | 1.18090900  | 2.22373600  | -1.52308000 |
| H | 0.52215200  | 0.58867800  | -1.79034000 |
| N | 0.40880300  | 1.31920100  | 0.17359600  |
| N | -1.24881400 | 1.54520500  | -0.28728700 |
| N | -2.03953000 | 2.30704400  | -0.32047900 |
| H | 3.18287400  | 1.28669100  | -0.47476400 |
| H | -0.25460200 | 1.07928600  | 2.53402500  |
| S | -1.42416000 | -1.00291900 | -0.92914400 |
| C | -2.83589700 | -1.10993500 | 0.20433800  |
| H | -3.72145900 | -0.86458900 | -0.38208200 |
| H | -2.92034400 | -2.12957600 | 0.57972400  |
| H | -2.72852900 | -0.40786100 | 1.02962600  |

#### 4.15 Cartesian coordinates of 3(III)

M06-2X/6-311++G(d,p)

|   |             |             |             |
|---|-------------|-------------|-------------|
| C | -0.60944900 | -1.35856300 | -1.11328800 |
| C | -2.15962600 | 0.48816100  | -0.73389000 |
| C | 0.11671900  | 0.97615800  | -0.44611700 |
| C | 0.54918200  | -0.35066400 | -0.95379600 |
| H | -0.25980400 | -2.34686800 | -0.81183500 |
| H | -0.86040800 | -1.41339800 | -2.17486800 |
| H | -2.05432700 | 0.69963800  | -1.79881500 |
| H | -3.12674000 | 0.85532500  | -0.38876600 |
| H | 1.18610000  | -0.26810700 | -1.83425800 |
| O | 0.98466800  | 1.92434200  | -0.41490700 |
| C | -1.87245600 | -0.95140000 | -0.33790600 |

|   |             |             |             |
|---|-------------|-------------|-------------|
| H | -2.68148600 | -1.63281300 | -0.59584300 |
| C | -1.68332600 | -0.82861500 | 1.19392000  |
| H | -0.91718400 | -1.50710400 | 1.57059500  |
| C | -1.31050900 | 0.65870600  | 1.44048800  |
| H | -2.12575800 | 1.22037300  | 1.89213100  |
| H | -0.40400100 | 0.80317800  | 2.02579100  |
| N | -1.12961200 | 1.23061900  | 0.04854100  |
| H | -2.61478900 | -1.06322000 | 1.70927900  |
| H | 0.58119700  | 2.72701200  | -0.02606600 |
| S | 1.61085800  | -0.89856700 | 0.46953200  |
| C | 3.15358800  | 0.00361200  | 0.19070200  |
| H | 3.89688700  | -0.50953200 | 0.80326300  |
| H | 3.44809000  | -0.06164800 | -0.85651900 |
| H | 3.08370200  | 1.04078800  | 0.51220100  |

**5. Calculation data for systems 4 ( $R_1=OCH_3$  and  $R_2=H$ ) and 5 ( $R_1=H$  and  $R_2=OCH_3$ ) using M06-2X/6-311++G(d,p) level of theory.**

**5.1. IRCs**

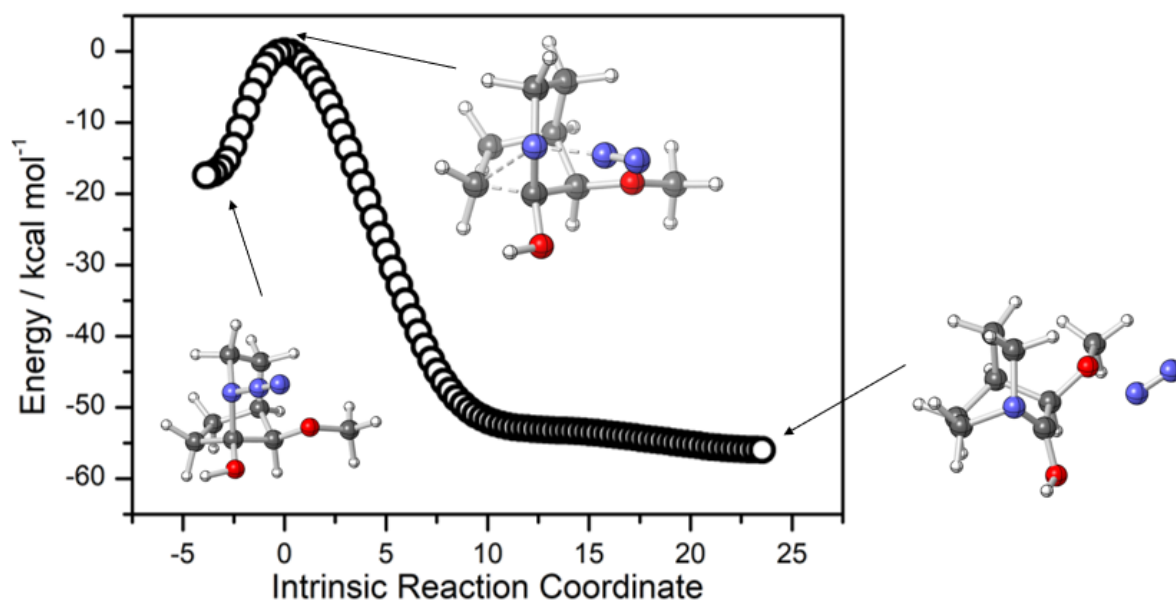

**Figure S8.** Optimized geometries for the formation of 4(III) from 4(III)-INT and IRC plot obtained using M06-2X/6-311++G(d,p) level of theory.

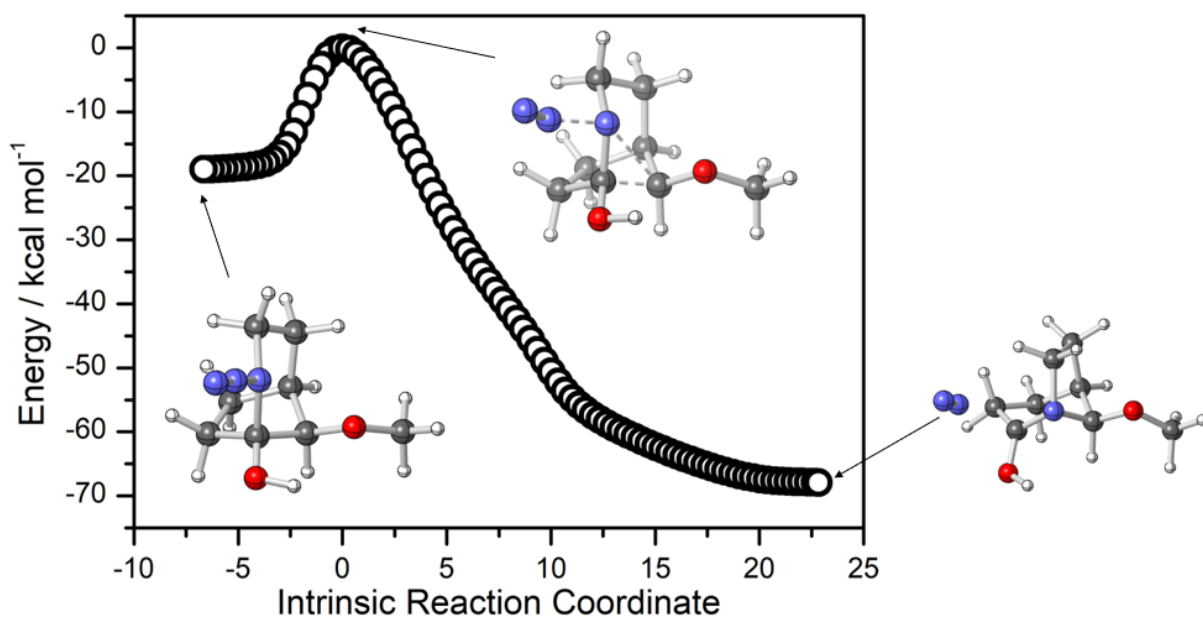

**Figure S9.** Optimized geometries for the formation of 4(III) from 4(III)-INT and IRC plot obtained using M06-2X/6-311++G(d,p) level of theory.

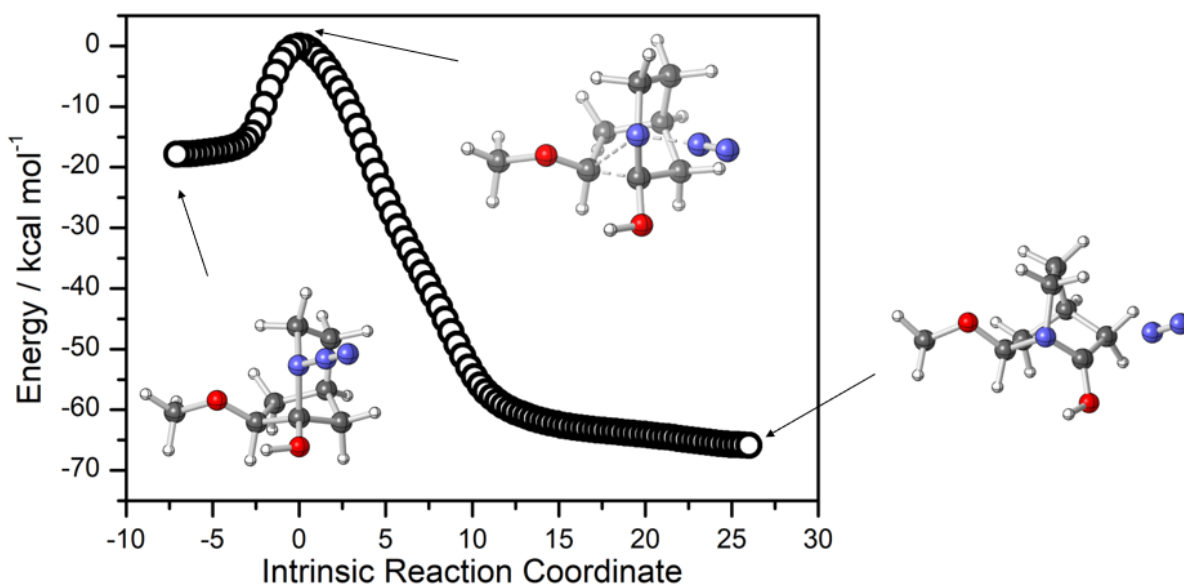

**Figure S10.** Optimized geometries for the formation of 5(III) from 5(III)-INT and IRC plot obtained using M06-2X/6-311++G(d,p) level of theory.



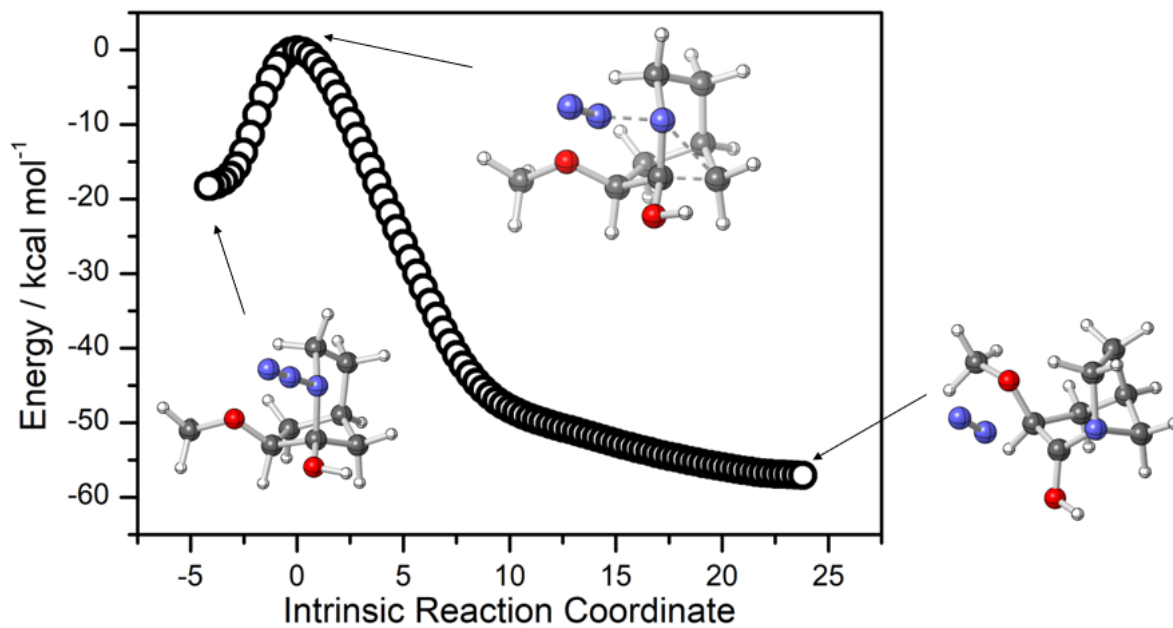

**Figure S11.** Optimized geometries for the formation of 5(III) from 5(III)-INT and IRC plot obtained using M06-2X/6-311++G(d,p) level of theory.

## 5.2. NCI

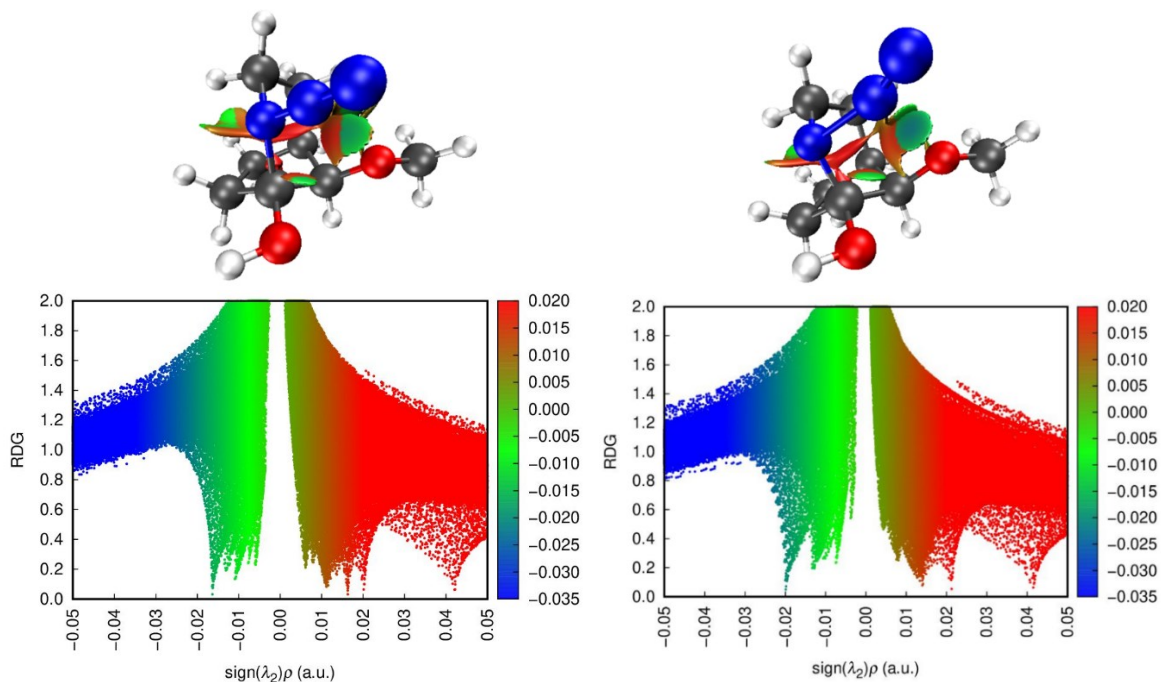

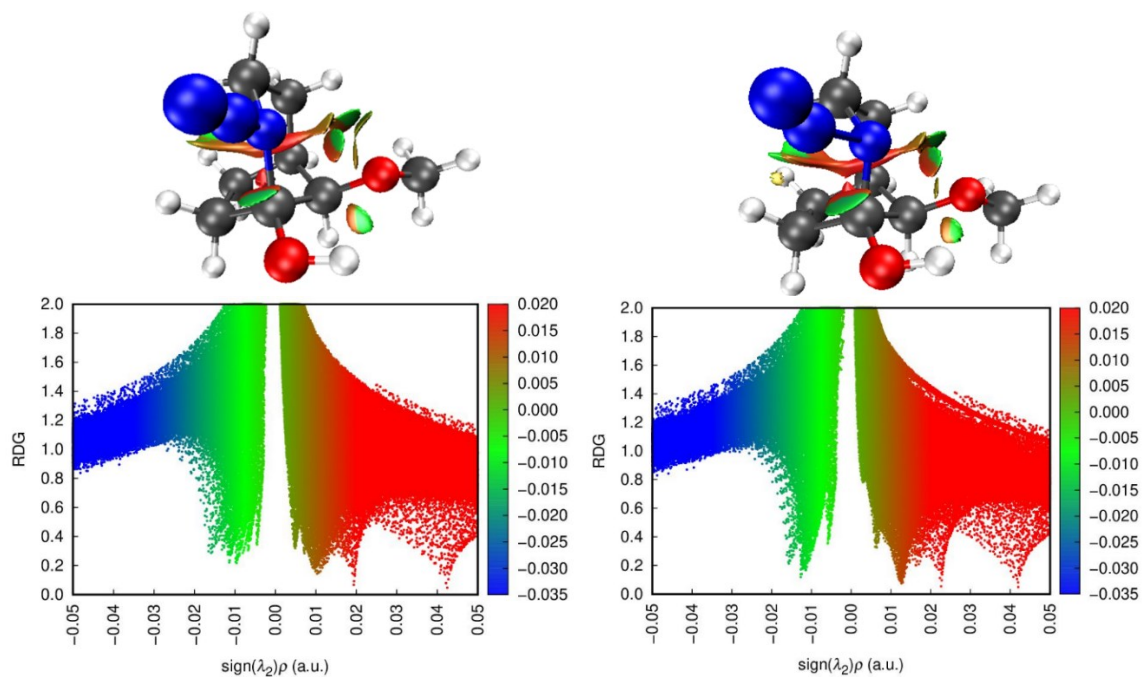

**Figure S12.** NCI isosurfaces for 4(II)-INT (top left), 4(II)-TSS2 (top right), 4(III)-INT (bottom left) and 4(III)-TSS2 (bottom right) obtained at M06-2X/6-311++G(d,p) level of theory using a blue-green-red color scale from  $-0.04 < \text{sign}(\lambda_2)\rho < 0.04$  a.u. Plots of the reduced density gradient and  $\text{sign}(\lambda_2)\rho$  are shown right under each correlated NCI isosurface obtained at the same level of theory.

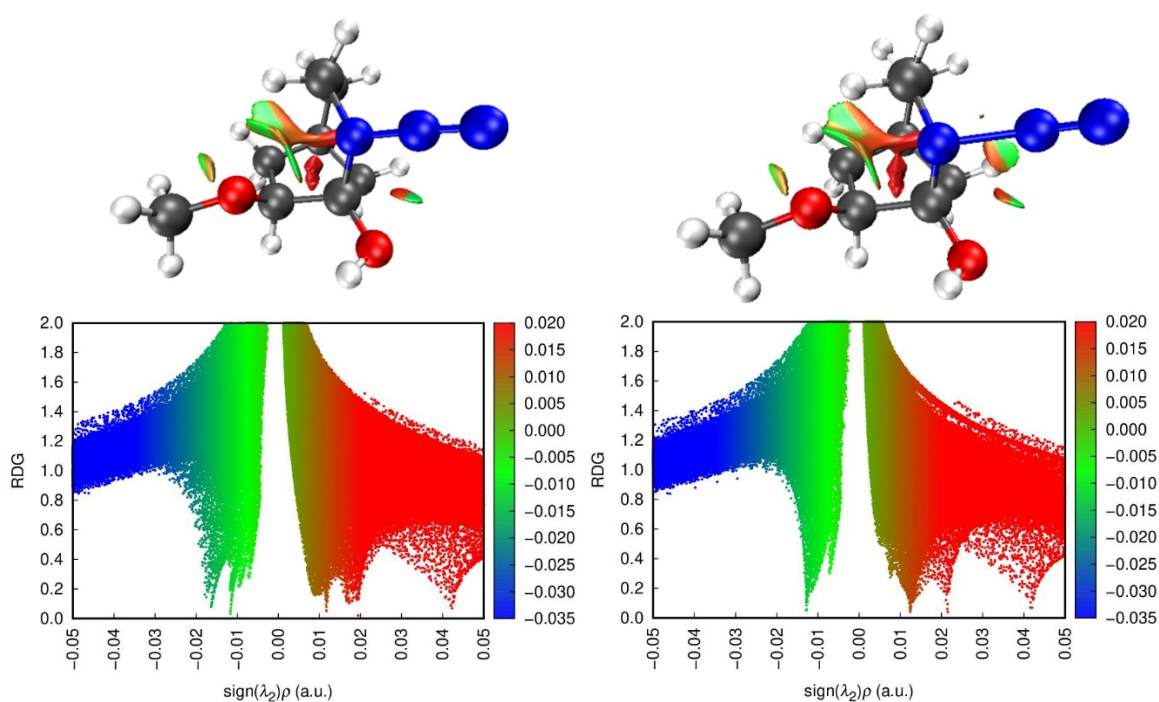

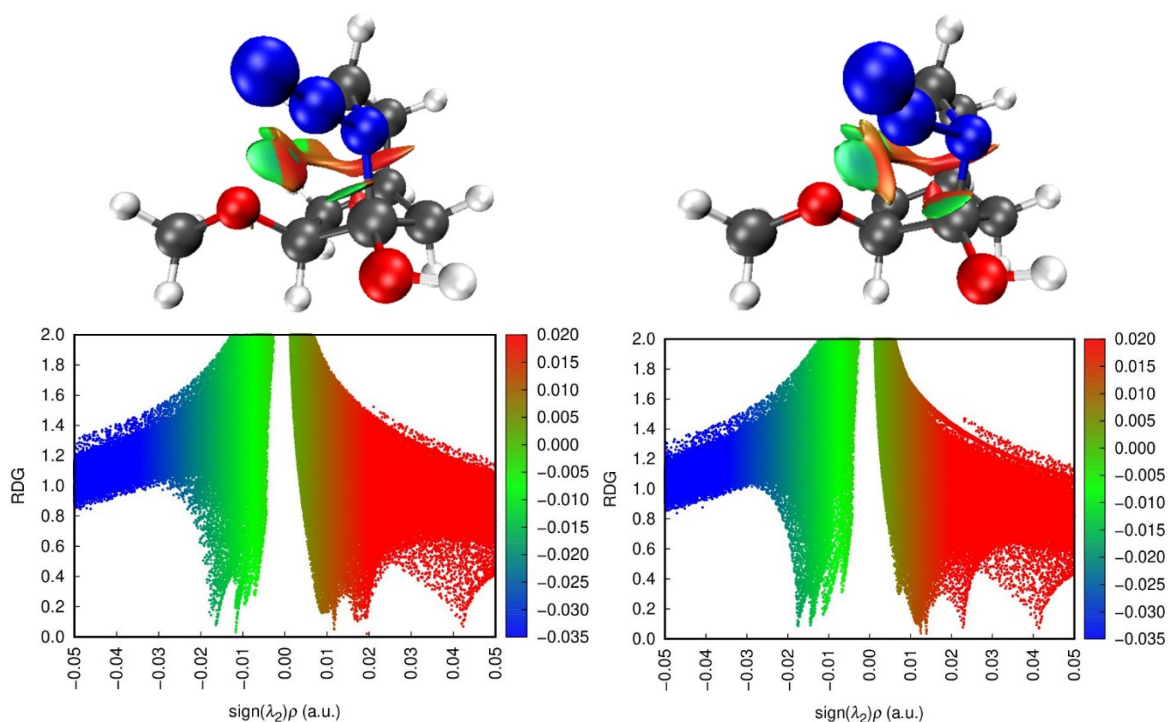

**Figure S13.** NCI isosurfaces for 5(II)-INT (top left), 5(II)-TSS2 (top right), 5(III)-INT (bottom left) and 5(III)-TSS2 (bottom right) obtained at M06-2X/6-311++G(d,p) level of theory using a blue-green-red color scale from  $-0.04 < \text{sign}(\lambda_2)\rho < 0.04$  a.u. Plots of the reduced density gradient and  $\text{sign}(\lambda_2)\rho$  are shown right under each correlated NCI isosurface obtained at the same level of theory.

### 5.3. Cartesian coordinates of 4(II)-TSS

M06-2X/6-311++G(d,p)

|   |             |             |             |
|---|-------------|-------------|-------------|
| C | -2.47743700 | 0.10509600  | -0.07725100 |
| C | -0.27727400 | 0.84232200  | -0.65967100 |
| C | -0.24746300 | -0.68820200 | -0.81111600 |
| C | -1.77852500 | -1.03919700 | -0.85245800 |
| H | -3.08493300 | -0.27139700 | 0.74649700  |
| H | -3.13896100 | 0.64808400  | -0.75233400 |
| H | -0.61790600 | 1.24863400  | -1.62147400 |
| H | -2.00817300 | -1.02954000 | -1.91959800 |
| H | -1.99279500 | -2.03916100 | -0.47357800 |
| O | 0.50325800  | -1.08594100 | -1.89112500 |
| C | -1.34616100 | 1.01964100  | 0.42844300  |
| H | -1.66430000 | 2.05736200  | 0.52423700  |
| C | -0.76275700 | 0.51909100  | 1.75414600  |
| H | -1.49680500 | 0.61881400  | 2.55591000  |
| C | -0.37961500 | -0.95210300 | 1.64449200  |

|   |             |             |             |
|---|-------------|-------------|-------------|
| H | 0.26782200  | -1.32207700 | 2.44090700  |
| H | -1.26570100 | -1.60962400 | 1.67720800  |
| N | 0.19068900  | -1.38386000 | 0.37669200  |
| N | 1.92609300  | -0.91671900 | 0.46264400  |
| N | 3.00609100  | -1.04965800 | 0.52745900  |
| H | 0.11635100  | 1.10597000  | 2.03150400  |
| H | 0.41088000  | -2.03905300 | -2.02888100 |
| O | 0.99998800  | 1.29938400  | -0.34557400 |
| C | 1.11846400  | 2.71675600  | -0.37688500 |
| H | 0.50429500  | 3.18118800  | 0.40064600  |
| H | 2.16612200  | 2.95046200  | -0.19630900 |
| H | 0.82262600  | 3.10402600  | -1.35691500 |

#### 5.4. Cartesian coordinates of 4(III)-TSS

M06-2X/6-311++G(d,p)

|   |             |             |             |
|---|-------------|-------------|-------------|
| C | -0.59262100 | 1.95444500  | 1.06319600  |
| C | -1.18937000 | -0.26449800 | 0.45264400  |
| C | 0.36313900  | -0.27436300 | 0.71969200  |
| C | 0.55449900  | 1.00586800  | 1.52489100  |
| H | -0.21309200 | 2.89818700  | 0.66932600  |
| H | -1.24036300 | 2.18856400  | 1.90736400  |
| H | -1.63055300 | -0.42407600 | 1.44762400  |
| H | 0.46391900  | 0.74722500  | 2.57924100  |
| H | 1.55509300  | 1.41843500  | 1.36855600  |
| O | 0.81821100  | -1.41031700 | 1.34372400  |
| C | -1.38786500 | 1.17669300  | -0.01036700 |
| H | -2.44190400 | 1.45636900  | -0.03315300 |
| C | -0.78202100 | 1.30244800  | -1.40167600 |
| H | -0.87069000 | 2.31755500  | -1.79297900 |
| C | 0.75028900  | 1.02044200  | -1.35421200 |
| H | 1.15354200  | 0.90148900  | -2.35766500 |
| H | 1.24024400  | 1.83972100  | -0.82416700 |
| N | 0.87827200  | -0.23821100 | -0.64895300 |
| N | 2.60050500  | -0.46484000 | -0.40444000 |
| N | 3.59131900  | -0.89538600 | -0.55447400 |
| H | -1.25974800 | 0.61376100  | -2.09870100 |
| H | 0.44547300  | -2.18492100 | 0.89512200  |
| O | -1.52350600 | -1.29972500 | -0.41173500 |
| C | -2.92044700 | -1.57559500 | -0.43195800 |
| H | -3.48218900 | -0.72764500 | -0.83509000 |

|   |             |             |             |
|---|-------------|-------------|-------------|
| H | -3.06165800 | -2.44152900 | -1.07583700 |
| H | -3.28001300 | -1.80638600 | 0.57625900  |

### 5.5. Cartesian coordinates of 5(II)-TSS

M06-2X/6-311++G(d,p)

|   |             |             |             |
|---|-------------|-------------|-------------|
| C | 1.49147000  | 1.29660300  | 0.45341700  |
| C | -0.60296100 | 0.68968600  | 1.48043800  |
| C | -0.19633900 | -0.51504100 | 0.64088100  |
| C | 1.34550700  | -0.24581100 | 0.45183800  |
| H | 1.89884000  | 1.65303600  | -0.49643000 |
| H | 2.17834000  | 1.60015100  | 1.24358000  |
| H | -0.17875500 | 0.56497000  | 2.47858200  |
| H | -1.68930400 | 0.77604700  | 1.56610300  |
| H | 1.76952400  | -0.67600800 | 1.36896000  |
| O | -0.51338700 | -1.72322300 | 1.21834000  |
| C | 0.06735800  | 1.83626100  | 0.70977800  |
| H | 0.06770200  | 2.76413600  | 1.27901700  |
| C | -0.67431000 | 2.03419500  | -0.61687500 |
| H | -0.22047100 | 2.83752200  | -1.20069800 |
| C | -0.62289400 | 0.75697500  | -1.44297100 |
| H | -1.29388600 | 0.72609800  | -2.30216800 |
| H | 0.38699100  | 0.56838200  | -1.86019600 |
| N | -0.75028600 | -0.48196200 | -0.71473700 |
| N | -2.47892600 | -0.66160800 | -0.37691800 |
| N | -3.48243500 | -1.08281900 | -0.44538500 |
| H | -1.71912500 | 2.30495200  | -0.43353500 |
| H | -0.09485200 | -2.44062500 | 0.72019200  |
| O | 1.83837900  | -0.92418100 | -0.66593200 |
| C | 3.26007200  | -0.99459000 | -0.67158400 |
| H | 3.54723700  | -1.53030900 | -1.57440700 |
| H | 3.70324800  | 0.00584600  | -0.68606600 |
| H | 3.61867400  | -1.53991400 | 0.20755900  |

### 5.6. Cartesian coordinates of 5(III)-TSS

M06-2X/6-311++G(d,p)

|   |             |             |             |
|---|-------------|-------------|-------------|
| C | -1.35035100 | 1.48468600  | -0.12730200 |
| C | -1.68094000 | -0.53349000 | 1.14594700  |
| C | -0.13729300 | -0.38141500 | 0.92560000  |
| C | -0.00064100 | 1.10722400  | 0.54266700  |
| H | -1.19070600 | 1.82332700  | -1.15423700 |

|   |             |             |             |
|---|-------------|-------------|-------------|
| H | -1.82451500 | 2.29801800  | 0.42159900  |
| H | -1.86129800 | -0.02218900 | 2.09574600  |
| H | -2.00739400 | -1.57170200 | 1.22573900  |
| H | 0.13782300  | 1.65183200  | 1.48326500  |
| O | 0.66744800  | -0.70568200 | 1.99280500  |
| C | -2.22363900 | 0.21241700  | -0.06688900 |
| H | -3.28532700 | 0.43772200  | 0.03807900  |
| C | -2.00361700 | -0.69753400 | -1.26851600 |
| H | -2.33202000 | -0.24144700 | -2.20433200 |
| C | -0.48397000 | -0.96749400 | -1.45624900 |
| H | -0.31243100 | -1.80161300 | -2.13313900 |
| H | -0.01405100 | -0.05582400 | -1.82609100 |
| N | 0.06063900  | -1.32446300 | -0.15098400 |
| N | 1.82184200  | -1.26024600 | -0.39529700 |
| N | 2.84270200  | -1.61585400 | -0.53713600 |
| H | -2.53568500 | -1.64056400 | -1.13620300 |
| H | 0.46981900  | -1.60233400 | 2.29871400  |
| O | 1.13627500  | 1.25119400  | -0.26361100 |
| C | 1.57359700  | 2.59949500  | -0.37982600 |
| H | 2.45311800  | 2.59482400  | -1.02133500 |
| H | 0.79847300  | 3.22547300  | -0.83306300 |
| H | 1.83925600  | 3.00099000  | 0.60303200  |

**6. Calculation data for systems 6 ( $R_1$ =phenyl and  $R_2$ =H) and 7 ( $R_1$ =H and  $R_2$ =phenyl) using M06-2X/6-311++G(d,p) level of theory**

### **6.1. IRCs**

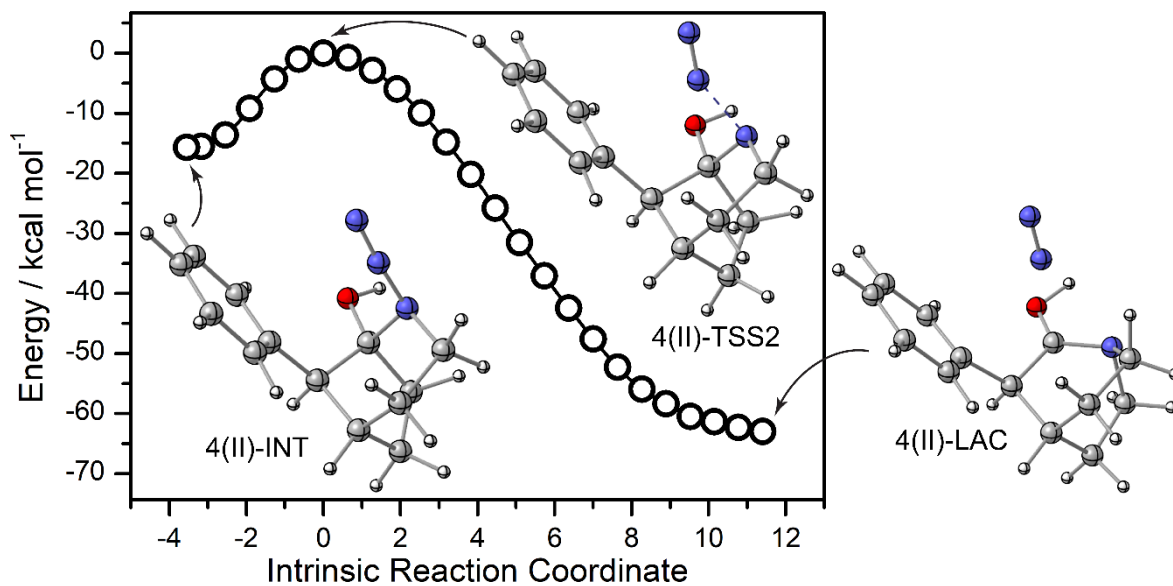

**Figure S14.** Optimized geometries for the formation of 6(II) from 6(II)-INT and IRC plot obtained using M06-2X/6-311++G(d,p) level of theory.

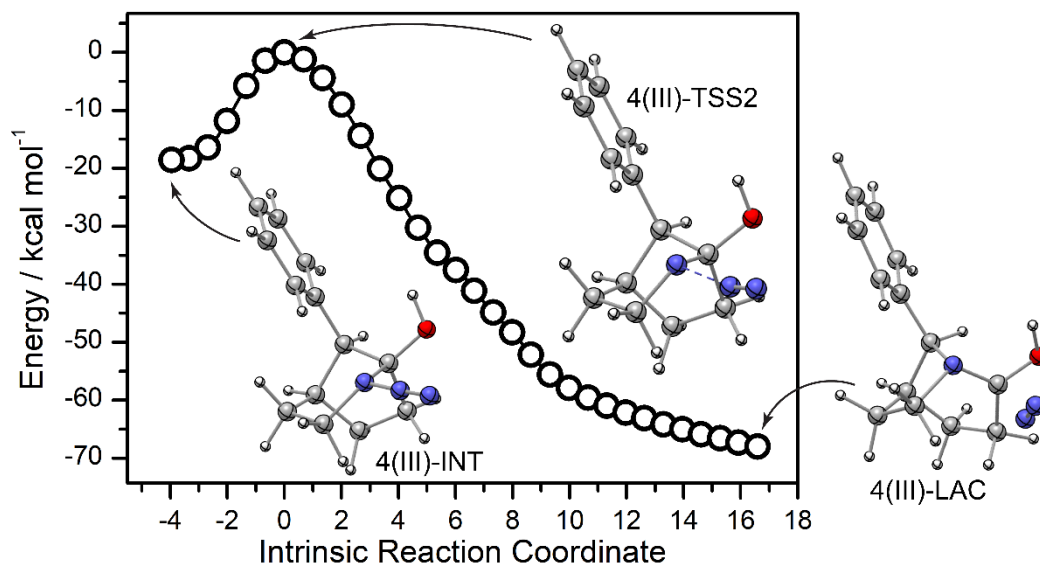

**Figure S15.** Optimized geometries for the formation of 6(III) from 6(III)-INT and IRC plot obtained using M06-2X/6-311++G(d,p) level of theory.

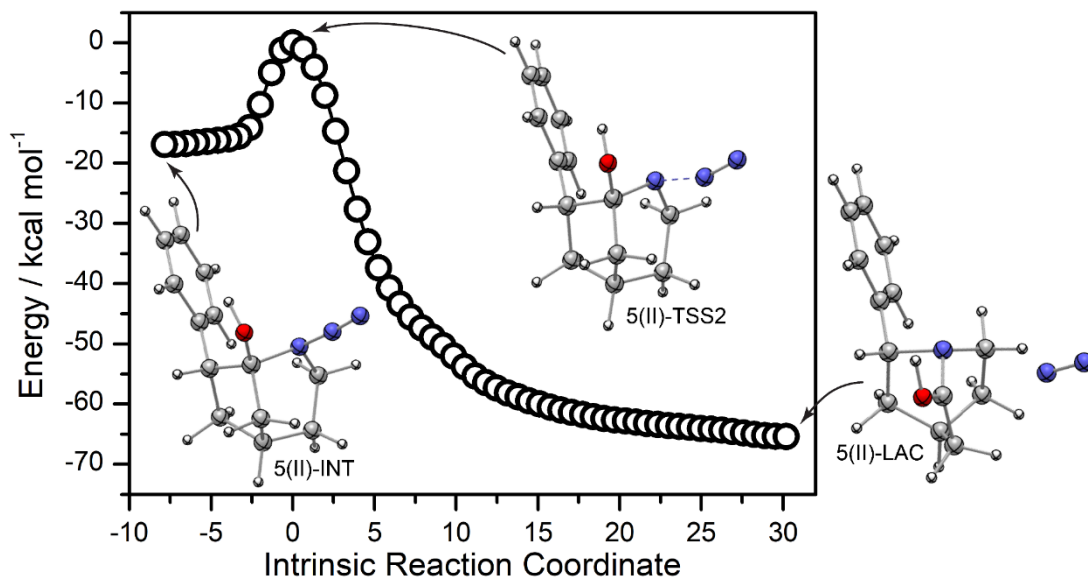

**Figure S16.** Optimized geometries for the formation of 7(II) from 7(II)-INT and IRC plot obtained using M06-2X/6-311++G(d,p) level of theory.

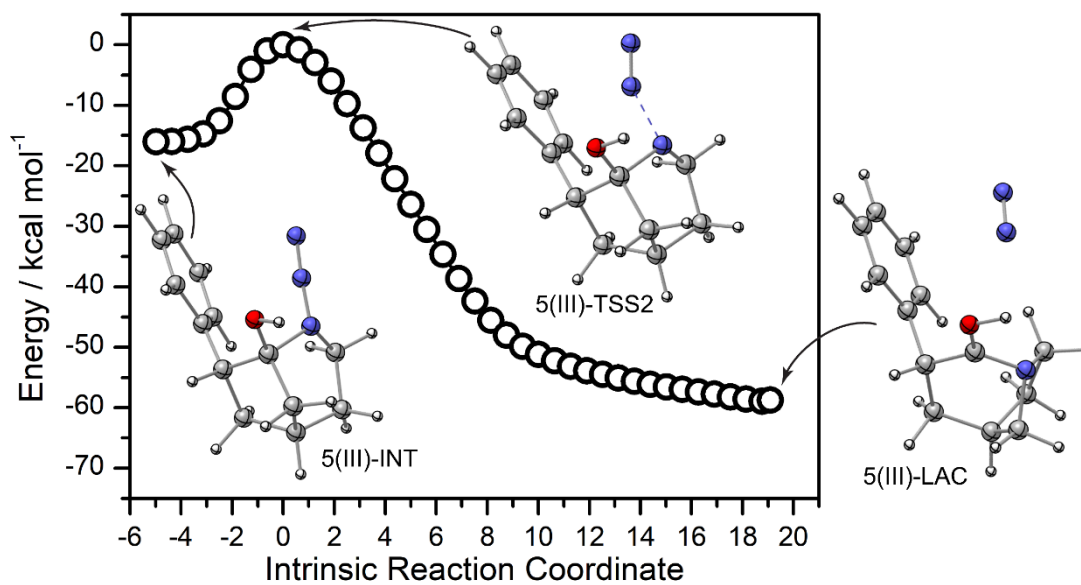

**Figure S17.** Optimized geometries for the formation of 7(III) from 7(III)-INT and IRC plot obtained using M06-2X/6-311++G(d,p) level of theory.



## 6.2. NBO analysis

**Table S4.** Total donor-acceptor interactions of type  $\sigma, \pi$  (C–C(phenyl))  $\leftrightarrow$   $\sigma^*, \pi^*$ (N–N) (in kcal mol<sup>-1</sup>) of system 6 (R<sub>1</sub>=phenyl, R<sub>2</sub>=H) and system 7 (R<sub>1</sub>=H, R<sub>2</sub>= phenyl) obtained by NBO calculations at M06-2X/6-311++G(d,p) level of theory.

| Structure       | $\Sigma \sigma, \pi$ (C–C(phenyl)) $\leftrightarrow$ $\sigma^*, \pi^*$ (N–N) kcal mol <sup>-1</sup> |
|-----------------|-----------------------------------------------------------------------------------------------------|
| <b>System 6</b> |                                                                                                     |
| 4(II)-INT       | 0.9                                                                                                 |
| 4(II)-TSS2      | 7.1                                                                                                 |
| 4(III)-INT      | 0.0                                                                                                 |
| 4(III)-TSS2     | 1.0                                                                                                 |
| <b>System 7</b> |                                                                                                     |
| 5(II)-INT       | 0.0                                                                                                 |
| 5(II)-TSS2      | 0.0                                                                                                 |
| 5(III)-INT      | 1.3                                                                                                 |
| 5(III)-TSS2     | 8.1                                                                                                 |

## 6.3 Cartesian coordinates of 6(II)-INT

M06-2X/6-311++G(d,p)

|   |            |             |             |
|---|------------|-------------|-------------|
| C | 2.63297000 | -1.41768200 | -0.72208200 |
| C | 0.37427800 | -0.60501500 | -0.90737000 |
| C | 1.28425600 | 0.62065700  | -0.73461900 |
| C | 2.68788300 | 0.09685600  | -1.03950100 |
| H | 3.41235500 | -1.72251400 | -0.02235800 |
| H | 2.76717200 | -1.99322000 | -1.63765700 |
| H | 0.44236900 | -0.84063700 | -1.97738900 |
| H | 2.85613300 | 0.27308500  | -2.10350900 |
| H | 3.44964400 | 0.64671300  | -0.48426100 |
| O | 0.89084100 | 1.75361100  | -1.39760300 |
| C | 1.21980200 | -1.66046800 | -0.14834400 |
| H | 0.87315800 | -2.67072100 | -0.36162700 |
| C | 1.19372800 | -1.42655800 | 1.37243700  |
| H | 1.79300600 | -2.19306900 | 1.86987200  |
| C | 1.78017800 | -0.07240100 | 1.75141100  |
| H | 1.50830400 | 0.24861600  | 2.75609700  |
| H | 2.86563400 | -0.04052600 | 1.66167300  |

|   |             |             |             |
|---|-------------|-------------|-------------|
| N | 1.29129300  | 0.97249800  | 0.78885000  |
| N | 0.31945100  | 1.69591200  | 1.17138500  |
| N | -0.46569300 | 2.40456500  | 1.49422100  |
| H | 0.17776100  | -1.49855600 | 1.76180700  |
| H | 1.65692300  | 2.31914900  | -1.56977800 |
| C | -1.09452100 | -0.46786900 | -0.54407900 |
| C | -1.82822500 | 0.66910100  | -0.90399000 |
| C | -1.77423500 | -1.52059100 | 0.07786400  |
| C | -3.18386400 | 0.76780300  | -0.60592200 |
| H | -1.34608900 | 1.48289700  | -1.43028800 |
| C | -3.13231600 | -1.42680100 | 0.36589300  |
| H | -1.25152700 | -2.43516200 | 0.33168600  |
| C | -3.84078300 | -0.27668100 | 0.03572200  |
| H | -3.72861200 | 1.66111200  | -0.88914100 |
| H | -3.63553500 | -2.25768900 | 0.84675300  |
| H | -4.89768000 | -0.20127800 | 0.26322200  |

#### 6.4 Cartesian coordinates of 6(II)-TSS2

M06-2X/6-311++G(d,p)

|   |             |             |             |
|---|-------------|-------------|-------------|
| C | 2.79900000  | -0.99396100 | -0.98120800 |
| C | 0.49188900  | -0.36368500 | -1.00091700 |
| C | 1.25675400  | 0.87024700  | -0.44344600 |
| C | 2.72904100  | 0.54944100  | -0.88747300 |
| H | 3.60659800  | -1.40660900 | -0.37551600 |
| H | 2.97701700  | -1.28810700 | -2.01566400 |
| H | 0.61594500  | -0.27691200 | -2.08616900 |
| H | 2.80336200  | 1.02907900  | -1.86464600 |
| H | 3.47877300  | 1.00347500  | -0.23824500 |
| O | 0.75208000  | 2.07033400  | -0.90122400 |
| C | 1.41894600  | -1.49192600 | -0.50351200 |
| H | 1.15130800  | -2.45282900 | -0.94268300 |
| C | 1.42930600  | -1.60447000 | 1.03084600  |
| H | 2.15929200  | -2.35884200 | 1.33145700  |
| C | 1.82360100  | -0.28180200 | 1.67413900  |
| H | 1.56711300  | -0.19685200 | 2.73044900  |
| H | 2.90930200  | -0.10184100 | 1.62959100  |
| N | 1.33743300  | 0.91695600  | 1.00022400  |
| N | -0.33941300 | 1.04582700  | 1.50161300  |
| N | -1.12894700 | 1.46344700  | 2.13099500  |

|   |             |             |             |
|---|-------------|-------------|-------------|
| H | 0.46636700  | -1.91361300 | 1.43387200  |
| H | 1.33075200  | 2.79476000  | -0.62537700 |
| C | -0.98904200 | -0.39525500 | -0.70147200 |
| C | -1.79296800 | 0.67214800  | -1.13300500 |
| C | -1.60806800 | -1.46649400 | -0.04748900 |
| C | -3.14929200 | 0.70531800  | -0.84108600 |
| H | -1.34673600 | 1.48670200  | -1.68827300 |
| C | -2.96972500 | -1.43763500 | 0.23619700  |
| H | -1.04099700 | -2.34630800 | 0.22664200  |
| C | -3.73988800 | -0.34084400 | -0.13598100 |
| H | -3.74870400 | 1.54593400  | -1.17076800 |
| H | -3.42882000 | -2.27733400 | 0.74485800  |
| H | -4.79804400 | -0.31348500 | 0.09689000  |

## 6.5 Cartesian coordinates of 6(II)

M06-2X/6-311++G(d,p)

|   |             |             |             |
|---|-------------|-------------|-------------|
| C | 2.57838500  | -1.00614700 | -0.82183500 |
| C | 0.27489900  | 0.03333200  | -0.88753000 |
| C | 1.14430100  | 1.05704700  | -0.24682900 |
| C | 3.10252200  | 0.02934200  | 0.21056600  |
| H | 3.14200700  | -1.93495100 | -0.72975000 |
| H | 2.71700200  | -0.63094100 | -1.83976500 |
| H | 0.31551600  | 0.23723000  | -1.96319000 |
| H | 3.76299800  | 0.77470800  | -0.22798600 |
| H | 3.60793400  | -0.43002900 | 1.05849100  |
| O | 1.41186300  | 2.13835500  | -0.88024300 |
| C | 1.08258600  | -1.27405200 | -0.55289000 |
| H | 0.71693700  | -2.08173800 | -1.18546500 |
| C | 0.92274300  | -1.58757700 | 0.93525500  |
| H | 1.64260500  | -2.35657100 | 1.22037200  |
| C | 1.18965600  | -0.27332200 | 1.70177600  |
| H | 0.26599100  | 0.18955000  | 2.04691900  |
| H | 1.83957400  | -0.41610800 | 2.56339200  |
| N | 1.88130900  | 0.71746500  | 0.83238700  |
| H | -0.07531800 | -1.95695500 | 1.16943900  |
| H | 2.06026800  | 2.68201000  | -0.38626500 |
| C | -1.18132600 | 0.04266700  | -0.44040200 |
| C | -1.74107500 | 1.15822300  | 0.18119800  |
| C | -1.98368600 | -1.06783300 | -0.70461500 |

|   |             |             |             |
|---|-------------|-------------|-------------|
| C | -3.08374800 | 1.15953500  | 0.54945200  |
| H | -1.14015100 | 2.04166700  | 0.37856400  |
| C | -3.32498000 | -1.06293100 | -0.33999900 |
| H | -1.56704300 | -1.93772800 | -1.20016500 |
| C | -3.87764900 | 0.04846200  | 0.29118900  |
| H | -3.50542000 | 2.03176600  | 1.03489400  |
| H | -3.93968500 | -1.92986700 | -0.55218600 |
| H | -4.92305400 | 0.04838300  | 0.57591600  |

## 6.6 Cartesian coordinates of 6(III)-INT

M06-2X/6-311++G(d,p)

|   |             |             |             |
|---|-------------|-------------|-------------|
| C | 1.98621900  | -2.16849900 | -0.02601600 |
| C | -0.07576400 | -1.00362800 | -0.40916100 |
| C | 1.04996200  | -0.10372300 | -0.90853800 |
| C | 2.24259800  | -1.04272000 | -1.06652100 |
| H | 2.81381300  | -2.27790800 | 0.67648500  |
| H | 1.86225100  | -3.12224100 | -0.53817400 |
| H | -0.21221100 | -1.70603500 | -1.23947100 |
| H | 2.21884200  | -1.42243500 | -2.08853000 |
| H | 3.18992300  | -0.51819200 | -0.92825000 |
| O | 0.80513100  | 0.69597400  | -1.98586200 |
| C | 0.66958000  | -1.78783000 | 0.69788800  |
| H | 0.09903000  | -2.66598300 | 0.99797400  |
| C | 0.92282800  | -0.90919200 | 1.92581200  |
| H | 1.42188200  | -1.49302100 | 2.70249600  |
| C | 1.83642400  | 0.26730700  | 1.60715800  |
| H | 1.77622700  | 1.05839200  | 2.35454200  |
| H | 2.87617200  | -0.04447700 | 1.48153400  |
| N | 1.38363600  | 0.85427100  | 0.29845700  |
| N | 1.95021600  | 1.93155000  | -0.05177700 |
| N | 2.38027500  | 2.89844300  | -0.37363800 |
| H | -0.02359900 | -0.55595800 | 2.33837800  |
| H | -0.13038300 | 0.95354800  | -1.99645400 |
| C | -1.42636100 | -0.37512600 | -0.14371400 |
| C | -1.63573800 | 0.77319200  | 0.63211700  |
| C | -2.54204900 | -0.98539300 | -0.72995000 |
| C | -2.91873400 | 1.28376900  | 0.81260700  |
| H | -0.81011900 | 1.28495700  | 1.10946000  |
| C | -3.82354400 | -0.48069800 | -0.54338000 |

|   |             |             |             |
|---|-------------|-------------|-------------|
| H | -2.40103600 | -1.87161300 | -1.34038000 |
| C | -4.01567600 | 0.65990000  | 0.22910800  |
| H | -3.05824100 | 2.17381800  | 1.41517800  |
| H | -4.66893400 | -0.97567200 | -1.00689300 |
| H | -5.01202600 | 1.06103500  | 0.37323400  |

## 6.7 Cartesian coordinates of 6(III)-TSS2

M06-2X/6-311++G(d,p)

|   |             |             |             |
|---|-------------|-------------|-------------|
| C | 1.71788400  | -2.32205300 | -0.07147100 |
| C | -0.19099600 | -0.92708000 | -0.44156000 |
| C | 1.08978900  | -0.07113800 | -0.81361800 |
| C | 2.14791800  | -1.15640900 | -1.00705200 |
| H | 2.49241200  | -2.57154200 | 0.65565300  |
| H | 1.51952300  | -3.21635200 | -0.66142600 |
| H | -0.30812600 | -1.50552700 | -1.36429100 |
| H | 2.12993800  | -1.45044100 | -2.05578400 |
| H | 3.14448400  | -0.76249600 | -0.78749200 |
| O | 0.94230400  | 0.75130900  | -1.90541500 |
| C | 0.41690800  | -1.85363700 | 0.62112000  |
| H | -0.25678800 | -2.67875500 | 0.85472000  |
| C | 0.70199500  | -1.04467300 | 1.87848400  |
| H | 1.14895400  | -1.65945300 | 2.66235400  |
| C | 1.75374500  | 0.05889200  | 1.57577100  |
| H | 1.81123500  | 0.78213600  | 2.38713100  |
| H | 2.72189600  | -0.41781100 | 1.40636800  |
| N | 1.28256500  | 0.74573200  | 0.38056400  |
| N | 2.59105300  | 1.79040300  | -0.07202900 |
| N | 3.14684400  | 2.72088800  | -0.19579400 |
| H | -0.20961900 | -0.59567900 | 2.27428500  |
| H | 0.11537700  | 1.25174700  | -1.83006200 |
| C | -1.50867100 | -0.23466200 | -0.19165000 |
| C | -1.68404300 | 0.91494800  | 0.58671700  |
| C | -2.63998700 | -0.81819900 | -0.77631700 |
| C | -2.95346000 | 1.45536700  | 0.77737800  |
| H | -0.83704300 | 1.40844800  | 1.04717200  |
| C | -3.90742900 | -0.28569300 | -0.57723600 |
| H | -2.52279700 | -1.70420400 | -1.39221500 |
| C | -4.06758800 | 0.85713300  | 0.20050900  |
| H | -3.06685200 | 2.35010200  | 1.37833700  |

|   |             |             |             |
|---|-------------|-------------|-------------|
| H | -4.76733800 | -0.75846900 | -1.03713600 |
| H | -5.05331700 | 1.28187500  | 0.35007000  |

### 6.8 Cartesian coordinates of 6(III)

M06-2X/6-311++G(d,p)

|   |             |             |             |
|---|-------------|-------------|-------------|
| C | 2.39865400  | 1.33218900  | 0.65516300  |
| C | 0.24361800  | 0.04261100  | 0.56864100  |
| C | 2.24197500  | -0.95144000 | 0.14331400  |
| C | 3.20478000  | 0.14364200  | -0.01140000 |
| H | 2.91455900  | 2.24985300  | 0.37064000  |
| H | 2.45568400  | 1.22718300  | 1.74102100  |
| H | 0.46821600  | -0.26397500 | 1.59473800  |
| H | 4.14249800  | -0.05328700 | 0.50213900  |
| H | 3.38540800  | 0.37608700  | -1.06004300 |
| O | 2.45980500  | -1.83821600 | 1.04584600  |
| C | 0.93417000  | 1.37352400  | 0.19586300  |
| H | 0.43727900  | 2.22975300  | 0.65003800  |
| C | 0.84354100  | 1.36895400  | -1.33920000 |
| H | 1.64529600  | 1.95675100  | -1.78826900 |
| C | 0.94617700  | -0.13013400 | -1.70204500 |
| H | 0.05474700  | -0.48900000 | -2.21294100 |
| H | 1.81128900  | -0.39233700 | -2.30914000 |
| N | 1.00597100  | -0.87351200 | -0.40639300 |
| H | -0.11056400 | 1.77527700  | -1.67367500 |
| H | 1.69527700  | -2.44399600 | 1.12792100  |
| C | -1.24728100 | -0.03630500 | 0.32938400  |
| C | -1.83020300 | -1.15311300 | -0.26700000 |
| C | -2.06185400 | 1.01132100  | 0.76378200  |
| C | -3.21034200 | -1.21986100 | -0.43337300 |
| H | -1.20333000 | -1.97039600 | -0.60603400 |
| C | -3.44102600 | 0.94087500  | 0.59857300  |
| H | -1.62794700 | 1.88318700  | 1.24011500  |
| C | -4.01874600 | -0.17342000 | -0.00240100 |
| H | -3.65246100 | -2.09179200 | -0.90132600 |
| H | -4.06380000 | 1.75937200  | 0.94035600  |
| H | -5.09316000 | -0.22541900 | -0.13336400 |

### 6.9 Cartesian coordinates of 7(II)-INT

M06-2X/6-311++G(d,p)

|   |             |             |             |
|---|-------------|-------------|-------------|
| C | -0.68469800 | -2.03722000 | -0.63717800 |
| C | -2.23945200 | -0.27424300 | -1.25532000 |
| C | -0.92747100 | 0.37706400  | -0.86574000 |
| C | 0.10582300  | -0.75794900 | -1.02045400 |
| H | -0.30382200 | -2.51693900 | 0.26507800  |
| H | -0.60109200 | -2.76466700 | -1.44378000 |
| H | -2.21594700 | -0.45365200 | -2.33251700 |
| H | -3.10790400 | 0.34506100  | -1.01821500 |
| H | 0.24405900  | -0.76973800 | -2.10693800 |
| O | -0.66512100 | 1.56079100  | -1.49237500 |
| C | -2.15953800 | -1.58516700 | -0.45393900 |
| H | -2.86012400 | -2.32732200 | -0.83275400 |
| C | -2.48538600 | -1.29114400 | 1.01748700  |
| H | -2.48869900 | -2.21472000 | 1.60154000  |
| C | -1.45055400 | -0.36561700 | 1.64588200  |
| H | -1.80312800 | 0.12896900  | 2.55067900  |
| H | -0.52088600 | -0.87672200 | 1.88124000  |
| N | -1.05633300 | 0.71349700  | 0.67053200  |
| N | -1.60666500 | 1.84288900  | 0.86217900  |
| N | -2.01736700 | 2.85798600  | 1.01398700  |
| H | -3.48158000 | -0.84684700 | 1.09004700  |
| H | 0.27839000  | 1.77326800  | -1.41681900 |
| C | 1.46165500  | -0.46788100 | -0.41502200 |
| C | 2.30768900  | 0.41449700  | -1.09927600 |
| C | 1.91210200  | -1.01485300 | 0.78798700  |
| C | 3.54260000  | 0.78097900  | -0.57446100 |
| H | 2.02212500  | 0.78141100  | -2.08205700 |
| C | 3.15257200  | -0.65821100 | 1.30973900  |
| H | 1.31771100  | -1.74848500 | 1.31925900  |
| C | 3.96542500  | 0.24974500  | 0.63932800  |
| H | 4.18097900  | 1.46197500  | -1.12520700 |
| H | 3.48785000  | -1.10158300 | 2.24024100  |
| H | 4.93099200  | 0.52305600  | 1.04810400  |

## 6.10 Cartesian coordinates of 7(II)-TSS2

M06-2X/6-311++G(d,p)

|   |             |             |             |
|---|-------------|-------------|-------------|
| C | -0.43057500 | -2.04235400 | -0.73792300 |
| C | -2.16112300 | -0.43286800 | -1.24857200 |
| C | -0.96725100 | 0.37901000  | -0.77197600 |

|   |             |             |             |
|---|-------------|-------------|-------------|
| C | 0.22236000  | -0.66414600 | -1.00311900 |
| H | -0.00108200 | -2.56048300 | 0.12039900  |
| H | -0.26887500 | -2.67961500 | -1.60754100 |
| H | -2.08527000 | -0.54208300 | -2.33172500 |
| H | -3.10635300 | 0.06204700  | -1.00866900 |
| H | 0.32235700  | -0.53158500 | -2.08491000 |
| O | -0.83491400 | 1.58055900  | -1.43002400 |
| C | -1.93582500 | -1.75999600 | -0.51578600 |
| H | -2.56891200 | -2.55607100 | -0.90385500 |
| C | -2.22284500 | -1.53969600 | 0.97472900  |
| H | -2.08304100 | -2.46328900 | 1.54023300  |
| C | -1.27274100 | -0.49188700 | 1.53553000  |
| H | -1.53429000 | -0.10021000 | 2.51901000  |
| H | -0.24781300 | -0.88402900 | 1.65550400  |
| N | -0.98199800 | 0.63319300  | 0.66392700  |
| N | -2.33828100 | 1.70020600  | 0.82790600  |
| N | -2.89393400 | 2.59459700  | 1.11275100  |
| H | -3.25730300 | -1.21352300 | 1.12039800  |
| H | -0.01256800 | 2.01497700  | -1.15751600 |
| C | 1.56372900  | -0.31636900 | -0.39863000 |
| C | 2.30627500  | 0.71073900  | -0.99579000 |
| C | 2.10296100  | -0.96295400 | 0.71582900  |
| C | 3.52982700  | 1.10870400  | -0.47070800 |
| H | 1.93970400  | 1.18143800  | -1.90399900 |
| C | 3.33223100  | -0.56967000 | 1.23873100  |
| H | 1.58675700  | -1.79665100 | 1.17756600  |
| C | 4.04413200  | 0.47187300  | 0.65500000  |
| H | 4.08909300  | 1.90245000  | -0.95204000 |
| H | 3.73697100  | -1.08872500 | 2.09982800  |
| H | 5.00249500  | 0.77260100  | 1.06151800  |

### 6.11 Cartesian coordinates of 7(II)

M06-2X/6-311++G(d,p)

|   |             |             |             |
|---|-------------|-------------|-------------|
| C | -1.03096500 | -0.75645400 | -1.39248900 |
| C | -3.08595700 | -0.27419400 | 0.01936100  |
| C | -2.22955300 | 0.90859900  | 0.20667000  |
| C | -0.21975900 | 0.39831400  | -0.73017600 |
| H | -0.37016100 | -1.53897500 | -1.76126700 |
| H | -1.56506100 | -0.35601000 | -2.25783800 |



|   |             |             |             |
|---|-------------|-------------|-------------|
| H | -3.84689800 | -0.05950800 | -0.73154500 |
| H | -3.58245000 | -0.56270700 | 0.95267100  |
| H | -0.30020500 | 1.30165900  | -1.33481800 |
| O | -2.59128500 | 2.04398700  | -0.26968900 |
| C | -2.03655400 | -1.35924000 | -0.38816600 |
| H | -2.56197900 | -2.20576500 | -0.82668100 |
| C | -1.27816800 | -1.74398900 | 0.87965800  |
| H | -0.41902000 | -2.36709100 | 0.62827500  |
| C | -0.82759400 | -0.42268500 | 1.54637100  |
| H | -1.43543400 | -0.18115100 | 2.41754000  |
| H | 0.21346800  | -0.44789800 | 1.86277400  |
| N | -0.95301600 | 0.72747300  | 0.61028800  |
| H | -1.91554900 | -2.30567700 | 1.56389700  |
| H | -1.89571900 | 2.71792700  | -0.12831700 |
| C | 1.24599200  | 0.20083900  | -0.41283600 |
| C | 1.96837800  | 1.33058600  | -0.01502400 |
| C | 1.89790000  | -1.02754700 | -0.48900000 |
| C | 3.31570200  | 1.23599700  | 0.30047000  |
| H | 1.46404800  | 2.28965900  | 0.05049500  |
| C | 3.25329900  | -1.12248000 | -0.17478100 |
| H | 1.37066100  | -1.92287700 | -0.79333700 |
| C | 3.96302400  | 0.00380300  | 0.22029600  |
| H | 3.86333500  | 2.12090200  | 0.60292400  |
| H | 3.75107000  | -2.08255200 | -0.24270900 |
| H | 5.01680000  | -0.07343000 | 0.46131400  |

## 6.12 Cartesian coordinates of 7(III)-INT

M06-2X/6-311++G(d,p)

|   |            |             |             |
|---|------------|-------------|-------------|
| C | 1.38965000 | 1.40705000  | -1.20177100 |
| C | 2.56327900 | -0.68167000 | -0.81946600 |
| C | 1.09655900 | -0.90189500 | -0.51690400 |
| C | 0.37696100 | 0.23117500  | -1.27867000 |
| H | 1.01720200 | 2.25228500  | -0.62127300 |
| H | 1.58622600 | 1.77672500  | -2.20748500 |
| H | 2.71216700 | -0.93400300 | -1.87271800 |
| H | 3.22212000 | -1.29452800 | -0.20067600 |
| H | 0.34985400 | -0.14000500 | -2.30749300 |
| O | 0.55228600 | -2.13804100 | -0.73992700 |
| C | 2.68728500 | 0.82739000  | -0.57287000 |

|   |             |             |             |
|---|-------------|-------------|-------------|
| H | 3.58048400  | 1.23948400  | -1.03933200 |
| C | 2.76328300  | 1.05570800  | 0.94168100  |
| H | 2.90558800  | 2.11518300  | 1.16634800  |
| C | 1.48642000  | 0.62904600  | 1.65493200  |
| H | 1.65442900  | 0.40628800  | 2.70809000  |
| H | 0.70465500  | 1.38322400  | 1.55895600  |
| N | 0.96887100  | -0.63866700 | 1.02039600  |
| N | -0.12946600 | -1.06006800 | 1.51361000  |
| N | -1.03744200 | -1.48713600 | 1.97665600  |
| H | 3.61903300  | 0.51158200  | 1.34605000  |
| H | 1.21626800  | -2.82517400 | -0.58839200 |
| C | -1.05430200 | 0.42154900  | -0.81963000 |
| C | -1.98935500 | -0.56113100 | -1.17110700 |
| C | -1.47084100 | 1.47058400  | 0.00303100  |
| C | -3.28664200 | -0.52124900 | -0.67724200 |
| H | -1.68865400 | -1.36976300 | -1.82816100 |
| C | -2.77418600 | 1.51404500  | 0.49564400  |
| H | -0.79082000 | 2.27353900  | 0.26147000  |
| C | -3.68084000 | 0.51291500  | 0.16913200  |
| H | -3.99212700 | -1.29529800 | -0.95622900 |
| H | -3.07901500 | 2.33823900  | 1.13027500  |
| H | -4.69307400 | 0.54653400  | 0.55479500  |

### 6.13 Cartesian coordinates of 7(III)-TSS2

M06-2X/6-311++G(d,p)

|   |             |             |             |
|---|-------------|-------------|-------------|
| C | -1.46559000 | -1.58078800 | -0.92882000 |
| C | -2.64818300 | 0.53077700  | -0.81572000 |
| C | -1.13678600 | 0.82822400  | -0.55216100 |
| C | -0.45544000 | -0.42875600 | -1.17778500 |
| H | -1.08991700 | -2.34070400 | -0.24235500 |
| H | -1.67721500 | -2.08111600 | -1.87313500 |
| H | -2.75794500 | 0.66419500  | -1.89487900 |
| H | -3.32092800 | 1.21572100  | -0.29577300 |
| H | -0.45686800 | -0.18809900 | -2.24359800 |
| O | -0.64448000 | 1.99081500  | -1.10869500 |
| C | -2.74416600 | -0.91818500 | -0.35856100 |
| H | -3.65591600 | -1.39889100 | -0.71351400 |
| C | -2.73456500 | -0.88298700 | 1.16559500  |
| H | -2.77567300 | -1.88204700 | 1.60422800  |

|   |             |             |             |
|---|-------------|-------------|-------------|
| C | -1.41218200 | -0.25721000 | 1.67078200  |
| H | -1.47801400 | 0.03926100  | 2.71574500  |
| H | -0.61910100 | -0.99406900 | 1.54059200  |
| N | -1.11123600 | 0.94428100  | 0.88583300  |
| N | 0.56000800  | 1.24481100  | 1.24029100  |
| N | 1.34526600  | 1.75463800  | 1.80569600  |
| H | -3.58541000 | -0.30983200 | 1.53678500  |
| H | -1.15625300 | 2.74818900  | -0.79161500 |
| C | 0.98345400  | -0.55989600 | -0.74481800 |
| C | 1.91037300  | 0.35353400  | -1.27530300 |
| C | 1.43572300  | -1.49306000 | 0.19781700  |
| C | 3.22311900  | 0.37536700  | -0.83087800 |
| H | 1.58298800  | 1.06159200  | -2.02801500 |
| C | 2.75486300  | -1.47175100 | 0.64229600  |
| H | 0.77314600  | -2.26070200 | 0.57902100  |
| C | 3.64551500  | -0.52709000 | 0.14561700  |
| H | 3.92095500  | 1.09403400  | -1.24439300 |
| H | 3.08642500  | -2.20070700 | 1.37225100  |
| H | 4.67048200  | -0.50853100 | 0.49710100  |

### 6.14 Cartesian coordinates of 7(III)

M06-2X/6-311++G(d,p)

|   |            |             |             |
|---|------------|-------------|-------------|
| C | 0.77741800 | 1.06247400  | 1.04521500  |
| C | 2.62322000 | 1.13095100  | -0.58574200 |
| C | 0.86056000 | -0.40646400 | -0.88587600 |
| C | 0.02160800 | 0.67084600  | -0.28617900 |
| H | 0.43861700 | 0.40174400  | 1.84452800  |
| H | 0.45145600 | 2.07390800  | 1.28971500  |
| H | 2.10432200 | 1.92088700  | -1.12240700 |
| H | 3.68902600 | 1.18758400  | -0.80321000 |
| H | 0.08066300 | 1.52662100  | -0.96420100 |
| O | 0.32803200 | -1.56345300 | -1.11479000 |
| C | 2.31769400 | 1.01377200  | 0.90781600  |
| H | 2.77696000 | 1.80052500  | 1.50225200  |
| C | 2.94310800 | -0.37846500 | 1.22458200  |
| H | 2.33780200 | -0.93325400 | 1.94275400  |
| C | 3.00596400 | -1.12339300 | -0.13970500 |
| H | 4.00408900 | -1.15169100 | -0.56895200 |
| H | 2.60231300 | -2.13331300 | -0.10925500 |

|   |             |             |             |
|---|-------------|-------------|-------------|
| N | 2.16574900  | -0.21526300 | -0.99906700 |
| H | 3.94494900  | -0.26565800 | 1.63792300  |
| H | 0.96893400  | -2.19942700 | -1.48243500 |
| C | -1.43146300 | 0.31445200  | -0.08399600 |
| C | -2.41779500 | 1.01006400  | -0.78037900 |
| C | -1.80582500 | -0.68689900 | 0.81444700  |
| C | -3.76315700 | 0.71117000  | -0.58293000 |
| H | -2.13459600 | 1.79280300  | -1.47662400 |
| C | -3.14767800 | -0.98829200 | 1.00919000  |
| H | -1.04642300 | -1.23635300 | 1.36230900  |
| C | -4.12943900 | -0.28756100 | 0.31180200  |
| H | -4.52247600 | 1.26165500  | -1.12594800 |
| H | -3.42900600 | -1.76813200 | 1.70700600  |
| H | -5.17641200 | -0.51935300 | 0.46884800  |

## 7. Calculation data for systems 8 ( $R_1$ =t-butyl and $R_2$ =H) and 9 ( $R_1$ =H and $R_2$ =t-butyl) using M06-2X/6-311++G(d,p) level of theory

### 7.1. IRCs

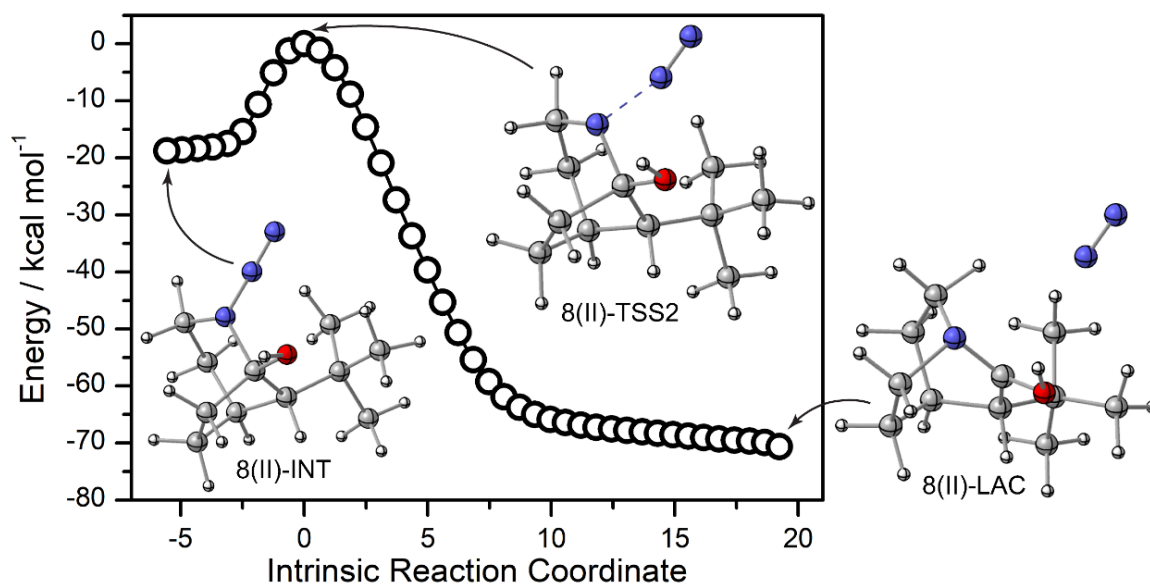

**Figure S18.** Optimized geometries for the formation of 8(II) from 8(II)-INT and IRC plot obtained using M06-2X/6-311++G(d,p) level of theory.

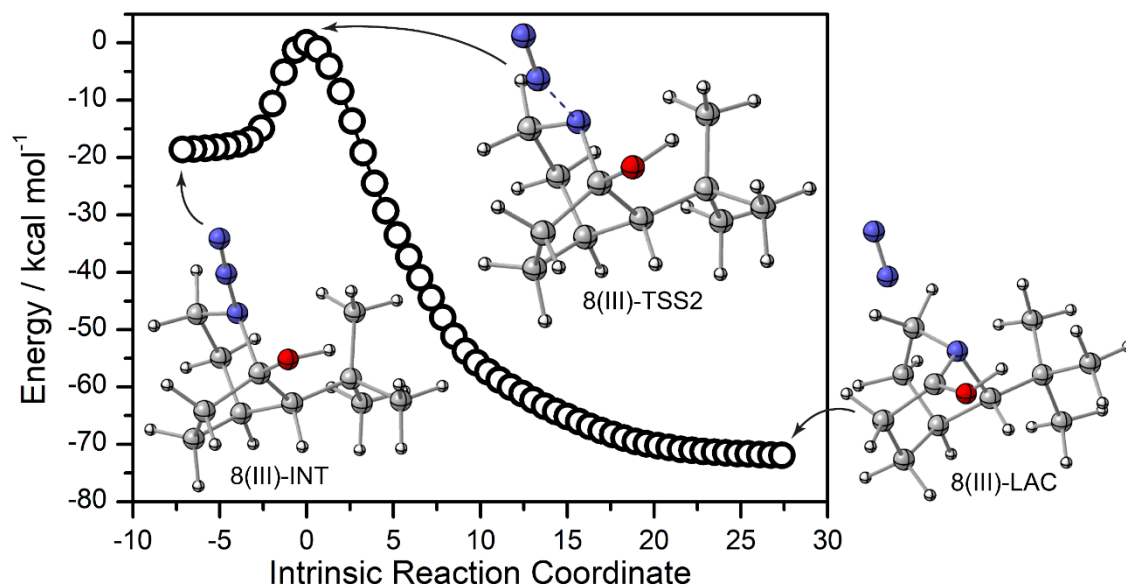

**Figure S19.** Optimized geometries for the formation of 8(III) from 8(III)-INT and IRC plot obtained using M06-2X/6-311++G(d,p) level of theory.

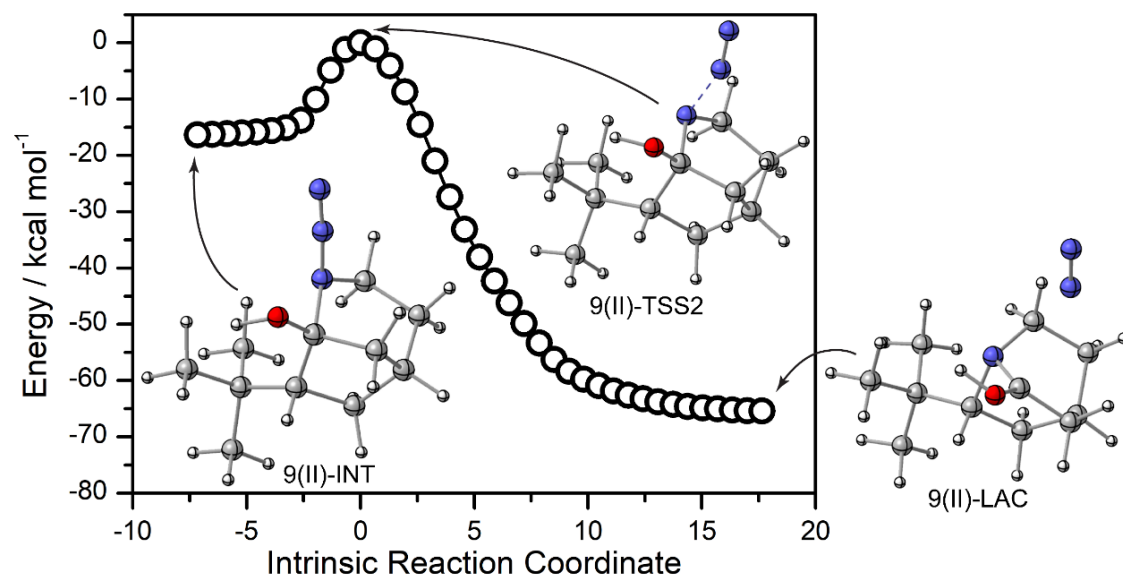

**Figure S20.** Optimized geometries for the formation of 9(II) from 9(II)-INT and IRC plot obtained using M06-2X/6-311++G(d,p) level of theory.

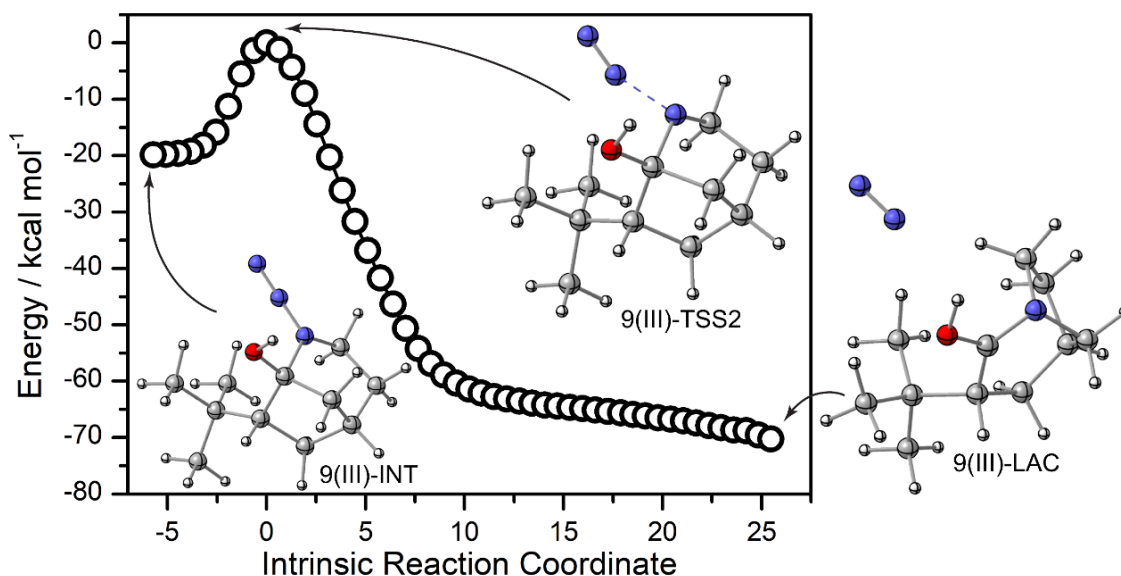

**Figure S21.** Optimized geometries for the formation of 9(III) from 9(III)-INT and IRC plot obtained using M06-2X/6-311++G(d,p) level of theory.

## 7.2 Cartesian coordinates of 8(II)-INT

M06-2X/6-311++G(d,p)

|   |             |             |             |
|---|-------------|-------------|-------------|
| C | -0.79695100 | 2.39291100  | -0.74530900 |
| C | 0.74646100  | 0.56154900  | -0.51075500 |
| C | -0.59279900 | -0.02543000 | -0.95504000 |
| C | -1.37180300 | 1.17004400  | -1.50686900 |
| H | -1.57602300 | 2.96142500  | -0.23519500 |
| H | -0.30277500 | 3.06600500  | -1.44535900 |
| H | 1.16536500  | 0.95256000  | -1.44793500 |
| H | -1.15459500 | 1.22997100  | -2.57561400 |
| H | -2.44832000 | 1.03545600  | -1.38684100 |
| O | -0.53531700 | -1.15654500 | -1.72262400 |
| C | 0.23855200  | 1.81374600  | 0.24990700  |
| H | 1.05339400  | 2.51439600  | 0.42592700  |
| C | -0.41326300 | 1.47209000  | 1.59593500  |
| H | -0.74689700 | 2.39051900  | 2.08515100  |
| C | -1.64127800 | 0.58315900  | 1.43266800  |
| H | -1.89273000 | 0.04328400  | 2.34469500  |
| H | -2.51495700 | 1.14156600  | 1.08991000  |
| N | -1.33235400 | -0.42814900 | 0.37689200  |
| N | -1.76869000 | -1.59252600 | 0.47840900  |
| N | -2.11574700 | -2.64522300 | 0.54801500  |
| H | 0.30662900  | 0.99210500  | 2.25870500  |

|   |             |             |             |
|---|-------------|-------------|-------------|
| H | -1.24813900 | -1.15735700 | -2.37641900 |
| C | 1.84349600  | -0.36231500 | 0.08551300  |
| C | 1.34091800  | -1.46880100 | 1.02592400  |
| C | 2.56983100  | -1.05022500 | -1.08317700 |
| C | 2.86731900  | 0.50695400  | 0.82827000  |
| H | 0.77596600  | -1.09665900 | 1.88364600  |
| H | 0.73895900  | -2.20865100 | 0.48948600  |
| H | 2.20790700  | -2.00434000 | 1.42217000  |
| H | 3.04084300  | -0.31044200 | -1.73685500 |
| H | 3.35418400  | -1.70822500 | -0.69960000 |
| H | 1.88372400  | -1.65095100 | -1.68319500 |
| H | 3.72708100  | -0.10479500 | 1.11402100  |
| H | 3.23161600  | 1.31685700  | 0.18927000  |
| H | 2.45593200  | 0.94882900  | 1.73940500  |

### 7.3 Cartesian coordinates of 8(II)-TSS2

M06-2X/6-311++G(d,p)

|   |             |             |             |
|---|-------------|-------------|-------------|
| C | -1.73163400 | -2.02207500 | 0.29352300  |
| C | 0.33860500  | -0.81869900 | 0.37806900  |
| C | -0.72175600 | 0.15787900  | 0.93623300  |
| C | -1.90484100 | -0.84089600 | 1.27478900  |
| H | -2.63739100 | -2.21066200 | -0.28476600 |
| H | -1.49962200 | -2.92867800 | 0.85294900  |
| H | 0.49721300  | -1.47231400 | 1.24476400  |
| H | -1.69706700 | -1.11564100 | 2.31060800  |
| H | -2.88745700 | -0.36694600 | 1.25058600  |
| O | -0.28664500 | 0.91440500  | 2.00260400  |
| C | -0.54229600 | -1.62287300 | -0.60589100 |
| H | -0.01677100 | -2.49246400 | -0.99887400 |
| C | -1.05292500 | -0.76013200 | -1.77151600 |
| H | -1.71354100 | -1.36218600 | -2.40016000 |
| C | -1.86598200 | 0.42121900  | -1.26180700 |
| H | -2.00016300 | 1.23088700  | -1.97983600 |
| H | -2.88574300 | 0.12093300  | -0.97935100 |
| N | -1.41716200 | 1.02027700  | -0.00086100 |
| N | -0.28024700 | 2.24616100  | -0.41313500 |
| N | 0.05589100  | 3.28175000  | -0.49497800 |
| H | -0.24312000 | -0.40918600 | -2.40553500 |
| H | -1.04558600 | 1.30954400  | 2.45440400  |

|   |            |             |             |
|---|------------|-------------|-------------|
| C | 1.78336100 | -0.39644500 | -0.02816900 |
| C | 1.96738400 | 0.15293600  | -1.45046000 |
| C | 2.37420900 | 0.60056100  | 0.97956500  |
| C | 2.62610100 | -1.68302700 | 0.05604000  |
| H | 1.78755700 | -0.61776800 | -2.20344000 |
| H | 1.33714800 | 1.01183800  | -1.68726400 |
| H | 3.00549000 | 0.47739900  | -1.56198600 |
| H | 2.23940000 | 0.25558800  | 2.00698200  |
| H | 3.44672800 | 0.69851800  | 0.79087800  |
| H | 1.93241800 | 1.59545400  | 0.90296100  |
| H | 3.65361300 | -1.47154000 | -0.25106600 |
| H | 2.65239800 | -2.07023400 | 1.07829500  |
| H | 2.23690800 | -2.46578000 | -0.60042300 |

#### 7.4 Cartesian coordinates of 8(II)

M06-2X/6-311++G(d,p)

|   |             |             |             |
|---|-------------|-------------|-------------|
| C | 1.89737900  | -0.58883800 | -1.39986600 |
| C | -0.36217700 | 0.09775400  | -0.61533000 |
| C | 0.47532300  | 1.09352100  | 0.09117400  |
| C | 2.56956900  | 0.40665400  | -0.41671000 |
| H | 2.57230900  | -1.42066000 | -1.60411700 |
| H | 1.68193700  | -0.09334700 | -2.34938000 |
| H | -0.51210900 | 0.53646300  | -1.61146300 |
| H | 2.84563400  | 1.34807700  | -0.88950000 |
| H | 3.45229200  | -0.00520200 | 0.07051800  |
| O | 0.26986400  | 2.34557800  | -0.06501700 |
| C | 0.59089300  | -1.11731300 | -0.77148300 |
| H | 0.12571100  | -1.85219300 | -1.42636800 |
| C | 0.94515100  | -1.72173400 | 0.58880700  |
| H | 1.74474800  | -2.45216900 | 0.45410600  |
| C | 1.41483300  | -0.56872000 | 1.50191200  |
| H | 0.70842000  | -0.35367100 | 2.30083700  |
| H | 2.38100500  | -0.77359500 | 1.96190300  |
| N | 1.61206800  | 0.69966000  | 0.73885700  |
| H | 0.09724300  | -2.24405100 | 1.03066100  |
| H | 0.93741300  | 2.86009900  | 0.43658500  |
| C | -1.82093600 | -0.09922700 | -0.04521100 |
| C | -1.88376300 | -0.17099300 | 1.48481800  |
| C | -2.66350500 | 1.09665300  | -0.50608800 |



|   |             |             |             |
|---|-------------|-------------|-------------|
| C | -2.39312700 | -1.38290700 | -0.64767100 |
| H | -1.38401200 | -1.05155600 | 1.88887100  |
| H | -1.46222800 | 0.72527900  | 1.95332500  |
| H | -2.93243100 | -0.22605200 | 1.78731000  |
| H | -2.67660400 | 1.17355100  | -1.59644700 |
| H | -3.69207900 | 0.96982000  | -0.16016600 |
| H | -2.29264700 | 2.04080500  | -0.09907000 |
| H | -3.44158600 | -1.47713000 | -0.35372200 |
| H | -2.34985000 | -1.36555800 | -1.74032800 |
| H | -1.86440200 | -2.27025100 | -0.29152000 |

## 7.5 Cartesian coordinates of 8(III)-INT

M06-2X/6-311++G(d,p)

|   |             |             |             |
|---|-------------|-------------|-------------|
| C | 0.64568700  | 2.27301000  | 1.00413900  |
| C | -0.81418500 | 0.41081000  | 0.57092300  |
| C | 0.57044900  | -0.15508700 | 0.89034200  |
| C | 1.31089200  | 0.99293200  | 1.57422700  |
| H | 1.37094900  | 2.95034500  | 0.55068700  |
| H | 0.14376100  | 2.81677000  | 1.80423000  |
| H | -1.21871900 | 0.64973000  | 1.56432700  |
| H | 1.13894700  | 0.88743100  | 2.64592300  |
| H | 2.38758600  | 0.93583300  | 1.40191500  |
| O | 0.69410500  | -1.34695200 | 1.54787900  |
| C | -0.39791700 | 1.77906500  | -0.02740800 |
| H | -1.25193500 | 2.45222700  | -0.08239800 |
| C | 0.21976400  | 1.64641100  | -1.42467500 |
| H | 0.47775200  | 2.63723000  | -1.80646000 |
| C | 1.50679400  | 0.83528500  | -1.40108500 |
| H | 1.78569300  | 0.45761400  | -2.38422800 |
| H | 2.33705100  | 1.40008000  | -0.97170900 |
| N | 1.26993000  | -0.35176900 | -0.51666900 |
| N | 2.15492700  | -1.25057600 | -0.53394600 |
| N | 2.87602800  | -2.09073600 | -0.55287300 |
| H | -0.48927200 | 1.20216900  | -2.12308300 |
| H | -0.04619000 | -1.93002100 | 1.33387100  |
| C | -1.88673700 | -0.47818200 | -0.12326300 |
| C | -2.95570600 | 0.43544600  | -0.73940800 |
| C | -1.35734800 | -1.42857000 | -1.20885900 |
| C | -2.59148600 | -1.32744100 | 0.95098800  |

|   |             |             |             |
|---|-------------|-------------|-------------|
| H | -3.35257200 | 1.13224700  | 0.00439800  |
| H | -2.56919100 | 1.01518500  | -1.58031900 |
| H | -3.78723600 | -0.17141600 | -1.10662900 |
| H | -0.66240300 | -2.17739200 | -0.81406100 |
| H | -2.20325200 | -1.97819700 | -1.63039100 |
| H | -0.86223900 | -0.90956400 | -2.03144300 |
| H | -3.37885000 | -1.92872500 | 0.48963200  |
| H | -1.92773600 | -2.02592500 | 1.47141900  |
| H | -3.05242400 | -0.69051400 | 1.71016600  |

## 7.6 Cartesian coordinates of 8(III)-TSS2

M06-2X/6-311++G(d,p)

|   |             |             |             |
|---|-------------|-------------|-------------|
| C | 0.47285000  | -2.23183400 | -1.08380600 |
| C | -0.87103500 | -0.31880100 | -0.54849800 |
| C | 0.62159400  | 0.19103400  | -0.75358900 |
| C | 1.25552000  | -0.96635500 | -1.52409300 |
| H | 1.12798200  | -2.99523000 | -0.66112700 |
| H | -0.03530500 | -2.67112800 | -1.94185200 |
| H | -1.17888100 | -0.41274100 | -1.59792900 |
| H | 1.13064400  | -0.75869700 | -2.58615000 |
| H | 2.32887300  | -1.01725800 | -1.31926800 |
| O | 0.78197900  | 1.39527800  | -1.40536900 |
| C | -0.57012400 | -1.74187500 | -0.05328500 |
| H | -1.46509500 | -2.36303600 | -0.05805900 |
| C | 0.01692800  | -1.69895200 | 1.35197300  |
| H | 0.27736100  | -2.69949400 | 1.70475200  |
| C | 1.35161400  | -0.90851300 | 1.35391300  |
| H | 1.65928600  | -0.64904500 | 2.36521400  |
| H | 2.11367500  | -1.51589900 | 0.86107100  |
| N | 1.10828100  | 0.32933100  | 0.61781700  |
| N | 2.67833700  | 1.01222000  | 0.39591400  |
| N | 3.52343900  | 1.67894200  | 0.57401200  |
| H | -0.68021300 | -1.26333500 | 2.06607900  |
| H | 0.27217100  | 2.08596100  | -0.95968200 |
| C | -1.94913300 | 0.57962300  | 0.12390500  |
| C | -3.11551200 | -0.32463500 | 0.55356600  |
| C | -1.48611600 | 1.40512200  | 1.33304700  |
| C | -2.49587600 | 1.55811400  | -0.93182100 |
| H | -3.46805900 | -0.93888600 | -0.27986400 |

|   |             |             |             |
|---|-------------|-------------|-------------|
| H | -2.84034400 | -0.98738500 | 1.37779200  |
| H | -3.95019400 | 0.29588200  | 0.88898300  |
| H | -0.74450500 | 2.16105100  | 1.05808200  |
| H | -2.34978600 | 1.93692300  | 1.74138400  |
| H | -1.06621000 | 0.79831500  | 2.13661000  |
| H | -3.28984500 | 2.16795900  | -0.49368500 |
| H | -1.73612400 | 2.24422500  | -1.31676500 |
| H | -2.91591100 | 1.01857000  | -1.78471100 |

### 7.7 Cartesian coordinates of 8(III)

M06-2X/6-311++G(d,p)

|   |             |             |             |
|---|-------------|-------------|-------------|
| C | -1.78424900 | -0.73331300 | 1.36095000  |
| C | 0.33255900  | 0.12156800  | 0.37852300  |
| C | -1.64077300 | 0.95375200  | -0.30744900 |
| C | -2.64140800 | 0.05962700  | 0.29460300  |
| H | -2.37347700 | -1.60479000 | 1.64783800  |
| H | -1.65325100 | -0.09975400 | 2.24094300  |
| H | 0.14438000  | 0.89968900  | 1.12588000  |
| H | -3.45640500 | 0.61203700  | 0.75572700  |
| H | -3.03661100 | -0.64039800 | -0.44202300 |
| O | -1.69730400 | 2.20951400  | -0.04227000 |
| C | -0.41556000 | -1.16177800 | 0.80158500  |
| H | 0.12949100  | -1.71690400 | 1.56470600  |
| C | -0.62212200 | -1.95102400 | -0.50097300 |
| H | -1.53210100 | -2.55169900 | -0.45126400 |
| C | -0.72744400 | -0.84965400 | -1.57622100 |
| H | 0.04878700  | -0.93087100 | -2.33077600 |
| H | -1.68444500 | -0.82381800 | -2.09525100 |
| N | -0.51661500 | 0.45968700  | -0.88269400 |
| H | 0.20793800  | -2.62362100 | -0.70834900 |
| H | -0.92166200 | 2.67127800  | -0.42181300 |
| C | 1.85021900  | 0.17450900  | 0.12791900  |
| C | 2.52310900  | -0.32774600 | 1.41337600  |
| C | 2.35532800  | -0.64127000 | -1.06466800 |
| C | 2.22231800  | 1.64543900  | -0.09649500 |
| H | 2.13325400  | 0.18433000  | 2.29866900  |
| H | 2.38340100  | -1.40328200 | 1.54641300  |
| H | 3.59691000  | -0.13347600 | 1.35971700  |
| H | 2.00540700  | -0.22601900 | -2.01225500 |

|   |            |             |             |
|---|------------|-------------|-------------|
| H | 3.44752000 | -0.59722800 | -1.07640700 |
| H | 2.07343800 | -1.69361400 | -1.00498300 |
| H | 3.29775000 | 1.73836500  | -0.26484300 |
| H | 1.70960800 | 2.04812400  | -0.97493800 |
| H | 1.96294900 | 2.25707400  | 0.77312600  |

## 7.8 Cartesian coordinates of 9(II)-INT

M06-2X/6-311++G(d,p)

|   |             |             |             |
|---|-------------|-------------|-------------|
| C | -0.55698300 | 1.85831600  | -0.33276700 |
| C | 1.26856100  | 0.78440500  | -1.50784700 |
| C | 0.43666400  | -0.30076800 | -0.84661400 |
| C | -0.92764000 | 0.37499200  | -0.62761900 |
| H | -0.80154200 | 2.15050100  | 0.69089800  |
| H | -1.12318200 | 2.51403800  | -0.99378000 |
| H | 0.87892700  | 0.92301900  | -2.51862700 |
| H | 2.32736700  | 0.52157700  | -1.57204200 |
| H | -1.31520400 | 0.35064700  | -1.65465100 |
| O | 0.48814400  | -1.49145600 | -1.51593500 |
| C | 0.96656100  | 1.98776800  | -0.60525400 |
| H | 1.21361900  | 2.92891800  | -1.09355500 |
| C | 1.79296900  | 1.85323000  | 0.68028900  |
| H | 1.64276300  | 2.71943000  | 1.32965400  |
| C | 1.37667100  | 0.62400400  | 1.47674000  |
| H | 2.11824500  | 0.30610900  | 2.20829800  |
| H | 0.43098100  | 0.77620400  | 1.98816800  |
| N | 1.12470300  | -0.54711500 | 0.55948000  |
| N | 2.07746100  | -1.38372000 | 0.48082200  |
| N | 2.85128800  | -2.17058300 | 0.41075400  |
| H | 2.85602800  | 1.80345500  | 0.43003200  |
| H | -0.29958600 | -2.01978700 | -1.33256000 |
| C | -2.05114400 | -0.27494300 | 0.22282200  |
| C | -1.80965300 | -0.30473700 | 1.73652900  |
| C | -3.31710900 | 0.55326200  | -0.04449800 |
| C | -2.30898500 | -1.71635900 | -0.24151800 |
| H | -0.95498400 | -0.92926500 | 2.00782100  |
| H | -1.67668700 | 0.69491000  | 2.15763900  |
| H | -2.68967100 | -0.73754500 | 2.22013900  |
| H | -3.56048900 | 0.56826200  | -1.11110100 |
| H | -4.16602800 | 0.12158600  | 0.49156900  |

|   |             |             |             |
|---|-------------|-------------|-------------|
| H | -3.19660800 | 1.58567700  | 0.29400100  |
| H | -3.23460600 | -2.08791100 | 0.20499100  |
| H | -2.42843100 | -1.78065200 | -1.32909900 |
| H | -1.51969300 | -2.40261000 | 0.09072200  |

## 7.9 Cartesian coordinates of 9(II)-TSS2

M06-2X/6-311++G(d,p)

|   |             |             |             |
|---|-------------|-------------|-------------|
| C | -0.69737000 | 1.80943800  | -0.41773900 |
| C | 1.22943500  | 0.78878900  | -1.46231300 |
| C | 0.50072300  | -0.33216000 | -0.73121700 |
| C | -0.95942800 | 0.29194000  | -0.60633200 |
| H | -1.00761800 | 2.16930600  | 0.56630800  |
| H | -1.27792100 | 2.36450600  | -1.15535600 |
| H | 0.84498300  | 0.82423400  | -2.48268200 |
| H | 2.30832900  | 0.61309900  | -1.49595200 |
| H | -1.25179800 | 0.14094400  | -1.65242000 |
| O | 0.60187500  | -1.52542200 | -1.41421100 |
| C | 0.82281400  | 2.01204300  | -0.63776100 |
| H | 1.04706200  | 2.94670600  | -1.14926300 |
| C | 1.58519600  | 1.94251600  | 0.68989100  |
| H | 1.34951900  | 2.79936700  | 1.32512200  |
| C | 1.18517800  | 0.68312600  | 1.44413200  |
| H | 1.83750200  | 0.41316800  | 2.27529600  |
| H | 0.18734200  | 0.79491700  | 1.88783100  |
| N | 0.97421500  | -0.52069600 | 0.63804000  |
| N | 2.55878500  | -1.15804400 | 0.37782800  |
| N | 3.38903200  | -1.86399000 | 0.42526100  |
| H | 2.66401600  | 1.94772300  | 0.50812400  |
| H | -0.03112700 | -2.16931300 | -1.07145600 |
| C | -2.09502500 | -0.37365200 | 0.20887400  |
| C | -2.20545000 | -1.86195600 | -0.14973200 |
| C | -1.99176600 | -0.26746500 | 1.73394600  |
| C | -3.38592100 | 0.33226100  | -0.23848400 |
| H | -2.24673900 | -2.01999000 | -1.23214900 |
| H | -1.38160300 | -2.44355600 | 0.28169100  |
| H | -3.12287600 | -2.27618200 | 0.27561500  |
| H | -1.90909700 | 0.76553100  | 2.08388100  |
| H | -2.90457900 | -0.67838900 | 2.17290300  |
| H | -1.15777500 | -0.85273500 | 2.12971600  |

|   |             |             |             |
|---|-------------|-------------|-------------|
| H | -4.24645400 | -0.12315300 | 0.25760800  |
| H | -3.37079700 | 1.39412700  | 0.02036900  |
| H | -3.52991100 | 0.24290400  | -1.31901400 |

## 7.10 Cartesian coordinates of 9(II)

M06-2X/6-311++G(d,p)

|   |             |             |             |
|---|-------------|-------------|-------------|
| C | -0.19373000 | -1.18012000 | -1.05570900 |
| C | -2.27590700 | 0.24264000  | -0.90441600 |
| C | -1.46206700 | 1.11050400  | -0.02438700 |
| C | 0.44328300  | 0.07581800  | -0.43081900 |
| H | 0.24627400  | -2.09174600 | -0.64345300 |
| H | -0.00310800 | -1.17746900 | -2.12994500 |
| H | -2.21951400 | 0.65094700  | -1.92038000 |
| H | -3.32774000 | 0.30111000  | -0.60023000 |
| H | 0.39096600  | 0.87657300  | -1.18088300 |
| O | -1.59726900 | 2.37667600  | -0.05945500 |
| C | -1.70665100 | -1.17693400 | -0.75028600 |
| H | -2.24387100 | -1.86188900 | -1.40337400 |
| C | -1.88046700 | -1.55302600 | 0.72213300  |
| H | -1.56166400 | -2.58219800 | 0.89051500  |
| C | -1.00041000 | -0.58906500 | 1.54781800  |
| H | -1.54143500 | -0.14318900 | 2.38092900  |
| H | -0.13032800 | -1.09373600 | 1.95286700  |
| N | -0.46332800 | 0.55731400  | 0.73163100  |
| H | -2.92943800 | -1.47364700 | 1.01460600  |
| H | -0.96497500 | 2.79411300  | 0.56413100  |
| C | 1.93291600  | 0.03738400  | -0.02962900 |
| C | 2.38774700  | 1.45938700  | 0.31076600  |
| C | 2.23699600  | -0.88645700 | 1.15234300  |
| C | 2.69551000  | -0.45456200 | -1.26898600 |
| H | 2.24579500  | 2.13460000  | -0.53921700 |
| H | 1.83810000  | 1.85421200  | 1.16810900  |
| H | 3.45094700  | 1.45936900  | 0.56341700  |
| H | 1.82166200  | -1.88860700 | 1.01513000  |
| H | 3.32099600  | -0.99058200 | 1.24755300  |
| H | 1.86739700  | -0.47103400 | 2.09250700  |
| H | 3.76976700  | -0.36905000 | -1.08880200 |
| H | 2.47516600  | -1.50153900 | -1.49083600 |

H 2.45314000 0.14572200 -2.15139400

### 7.11 Cartesian coordinates of 9(III)-INT

M06-2X/6-311++G(d,p)

|   |             |             |             |
|---|-------------|-------------|-------------|
| C | -0.12774600 | 1.96307300  | -0.13276600 |
| C | -1.59064400 | 0.81572700  | 1.42288100  |
| C | -0.49148700 | -0.14333400 | 1.00076400  |
| C | 0.63983500  | 0.78812100  | 0.53807700  |
| H | 0.01865900  | 1.98294100  | -1.21508600 |
| H | 0.23971400  | 2.91274200  | 0.25485700  |
| H | -1.25008300 | 1.32218000  | 2.32949200  |
| H | -2.53726200 | 0.30702800  | 1.62311800  |
| H | 1.00857700  | 1.15178200  | 1.50514600  |
| O | -0.11641200 | -1.11431500 | 1.88939900  |
| C | -1.62828800 | 1.76893800  | 0.22120700  |
| H | -2.11244600 | 2.71103400  | 0.47271200  |
| C | -2.41575700 | 1.09317700  | -0.90917000 |
| H | -2.50635400 | 1.76358000  | -1.76667600 |
| C | -1.72990200 | -0.17203200 | -1.41154300 |
| H | -2.42696800 | -0.86418800 | -1.88319300 |
| H | -0.91728900 | 0.05703800  | -2.09981800 |
| N | -1.12897100 | -0.88770100 | -0.23364500 |
| N | -0.78381100 | -2.08606400 | -0.38861100 |
| N | -0.50554900 | -3.15557400 | -0.47617100 |
| H | -3.42307600 | 0.85928500  | -0.55812400 |
| H | -0.84536100 | -1.30549600 | 2.49594000  |
| C | 1.90233500  | 0.25909600  | -0.18846100 |
| C | 2.54534200  | -0.87849000 | 0.61545000  |
| C | 1.68429900  | -0.22024100 | -1.62992600 |
| C | 2.88704300  | 1.43841200  | -0.23588100 |
| H | 2.69887100  | -0.59064400 | 1.65879600  |
| H | 1.93777200  | -1.78655800 | 0.60654300  |
| H | 3.51871800  | -1.12535700 | 0.18309200  |
| H | 1.24853300  | 0.55299800  | -2.26692700 |
| H | 2.65675400  | -0.47483500 | -2.06000100 |
| H | 1.07515900  | -1.12542100 | -1.70195200 |
| H | 3.82983000  | 1.12005400  | -0.68773900 |
| H | 2.49333000  | 2.26729800  | -0.83044500 |

H 3.10235500 1.80975100 0.77027500

## 7.12 Cartesian coordinates of 9(III)-TSS2

M06-2X/6-311++G(d,p)

|   |             |             |             |
|---|-------------|-------------|-------------|
| C | 0.29697000  | -1.97963800 | -0.18191900 |
| C | 1.76330500  | -0.77119000 | 1.30948200  |
| C | 0.57472000  | 0.18988400  | 0.92892100  |
| C | -0.50458400 | -0.83796400 | 0.50696400  |
| H | 0.10372200  | -2.03137700 | -1.25560600 |
| H | 0.00124100  | -2.93967200 | 0.24035600  |
| H | 1.42327600  | -1.25535100 | 2.22851400  |
| H | 2.70080900  | -0.24590500 | 1.50391600  |
| H | -0.80102300 | -1.21515500 | 1.49200000  |
| O | 0.15225300  | 1.02036900  | 1.94610800  |
| C | 1.79193000  | -1.69506600 | 0.09936000  |
| H | 2.36280300  | -2.60324400 | 0.29341100  |
| C | 2.44494200  | -0.90501700 | -1.02963100 |
| H | 2.48087900  | -1.46830300 | -1.96431900 |
| C | 1.60305500  | 0.36003900  | -1.34397800 |
| H | 2.17299500  | 1.07194300  | -1.93757800 |
| H | 0.69944800  | 0.05267100  | -1.86598600 |
| N | 1.28997100  | 0.98660800  | -0.06232000 |
| N | 0.27376300  | 2.31918100  | -0.42122400 |
| N | 0.03288800  | 3.38176600  | -0.49285600 |
| H | 3.46147000  | -0.61622300 | -0.75824900 |
| H | 0.91744000  | 1.41743600  | 2.38564600  |
| C | -1.84920300 | -0.42752700 | -0.15045800 |
| C | -2.55052800 | 0.64039600  | 0.69855200  |
| C | -1.76981600 | 0.05705300  | -1.60476000 |
| C | -2.72024300 | -1.69535400 | -0.14173100 |
| H | -2.63529200 | 0.31997600  | 1.74018700  |
| H | -2.02298300 | 1.59615500  | 0.69047600  |
| H | -3.55853400 | 0.81155700  | 0.31135000  |
| H | -1.30327100 | -0.67889100 | -2.26503400 |
| H | -2.78648800 | 0.21693700  | -1.97423000 |
| H | -1.25141600 | 1.01203800  | -1.71875500 |
| H | -3.71576400 | -1.46368700 | -0.52894200 |
| H | -2.29230800 | -2.48223400 | -0.76868800 |
| H | -2.83466700 | -2.08820900 | 0.87266100  |



### 7.13 Cartesian coordinates of 9(III)

M06-2X/6-311++G(d,p)

|   |             |             |             |
|---|-------------|-------------|-------------|
| C | -0.23677800 | -1.45011400 | 0.28701100  |
| C | -1.95423100 | -0.60272300 | -1.25641600 |
| C | -0.34791900 | 0.88287300  | -0.36869400 |
| C | 0.56391900  | -0.29378800 | -0.43170700 |
| H | -0.02132500 | -1.42637200 | 1.35604800  |
| H | 0.15325100  | -2.38606000 | -0.11219600 |
| H | -1.31650700 | -0.88741700 | -2.08889900 |
| H | -2.98970600 | -0.56679900 | -1.59177500 |
| H | 0.61301100  | -0.57177200 | -1.49114500 |
| O | 0.04323800  | 1.98093700  | 0.19992700  |
| C | -1.76193800 | -1.38987700 | 0.04047300  |
| H | -2.17739300 | -2.39446400 | -0.00074400 |
| C | -2.53974400 | -0.49441200 | 1.05127500  |
| H | -2.02812700 | -0.44513300 | 2.01387500  |
| C | -2.60503900 | 0.91018600  | 0.38790600  |
| H | -3.57134500 | 1.13254300  | -0.05714900 |
| H | -2.32541900 | 1.72403400  | 1.05327100  |
| N | -1.61505800 | 0.73939200  | -0.73533300 |
| H | -3.54493200 | -0.88065900 | 1.21762700  |
| H | -0.65115500 | 2.66501300  | 0.19466900  |
| C | 2.03045700  | -0.10094400 | 0.03255400  |
| C | 2.72248600  | 0.91134900  | -0.89007100 |
| C | 2.16645000  | 0.34365800  | 1.49466500  |
| C | 2.73493300  | -1.45670900 | -0.12786200 |
| H | 2.67680900  | 0.58400400  | -1.93306100 |
| H | 2.28136900  | 1.90719600  | -0.81855100 |
| H | 3.77634600  | 0.99698100  | -0.61399400 |
| H | 1.63896900  | -0.32649200 | 2.17799200  |
| H | 3.22406400  | 0.31724200  | 1.76985900  |
| H | 1.81012800  | 1.36033500  | 1.65883300  |
| H | 3.80627800  | -1.33008500 | 0.04445600  |
| H | 2.36853800  | -2.19331500 | 0.59082500  |
| H | 2.60106900  | -1.85901100 | -1.13683500 |

## 8. Additional groups data

### 8.1 Calculation data for CF<sub>3</sub>-systems

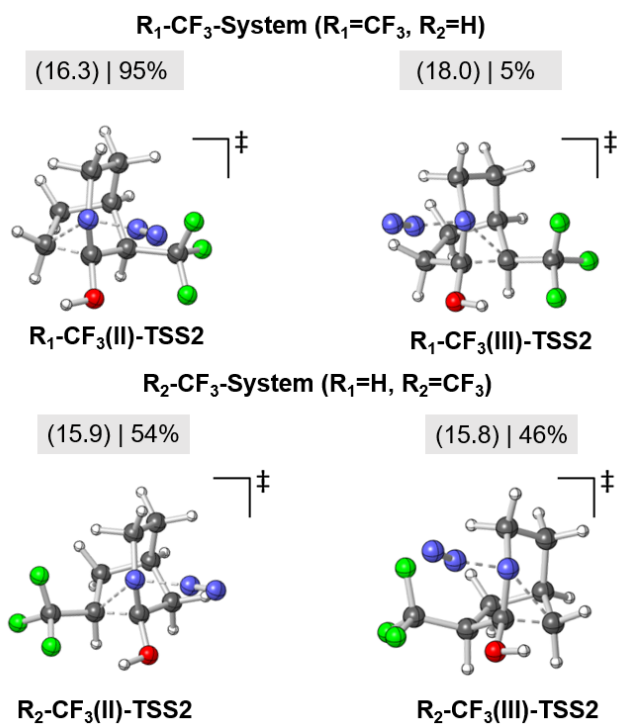

**Figure S22.** TSSs, relative free energies (in kcal mol<sup>-1</sup>, in parentheses) and percentage of formation for the second and rate determinant step for reaction presented in Scheme 1, R<sub>1</sub>-F-System (R<sub>1</sub>=F, R<sub>2</sub>=H) and R<sub>2</sub>-F-System (R<sub>1</sub>=H, R<sub>2</sub>=F), obtained at M06-2X/6-311++G(d,p) level of theory.

### 8.1.1 IRCs

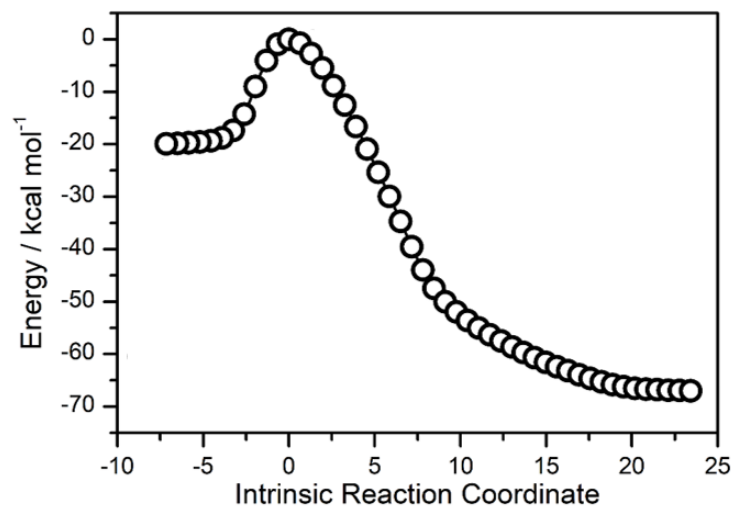

**Figure S23.** IRC plot for R<sub>1</sub>-CF<sub>3</sub>(II)-TSS2 (Figure S22) calculated at M06-2X/6-311++G(d,p) level of theory.

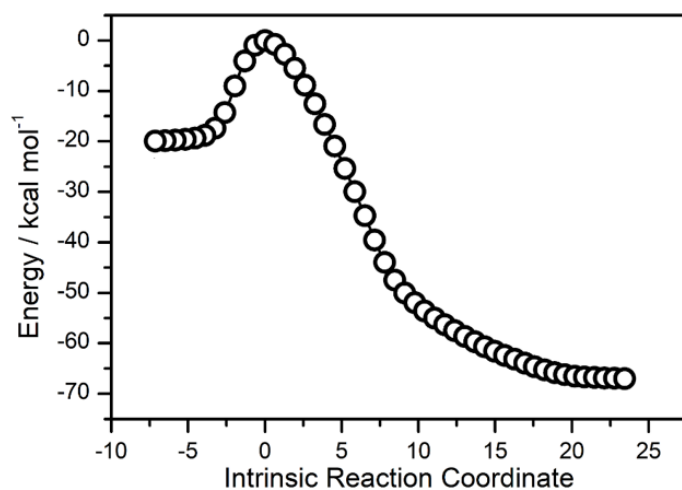

**Figure S24.** IRC plot for R<sub>1</sub>-CF<sub>3</sub>(III)-TSS2 (Figure S22) calculated at M06-2X/6-311++G(d,p) level of theory.

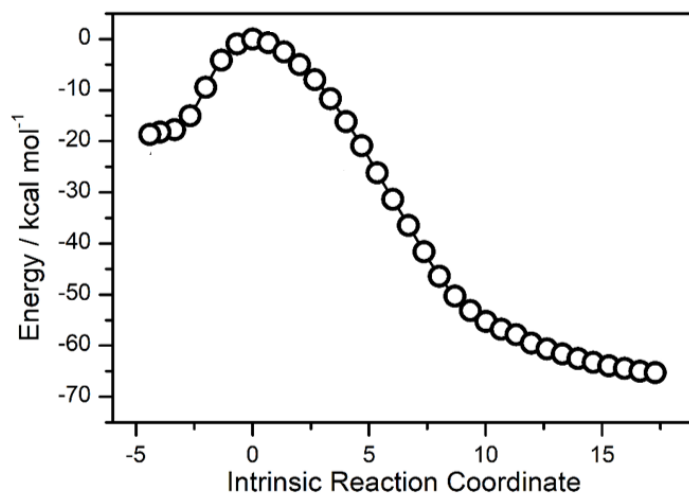

**Figure S25.** IRC plot for R<sub>2</sub>-CF<sub>3</sub>(II)-TSS2 (Figure S22) calculated at M06-2X/6-311++G(d,p) level of theory.

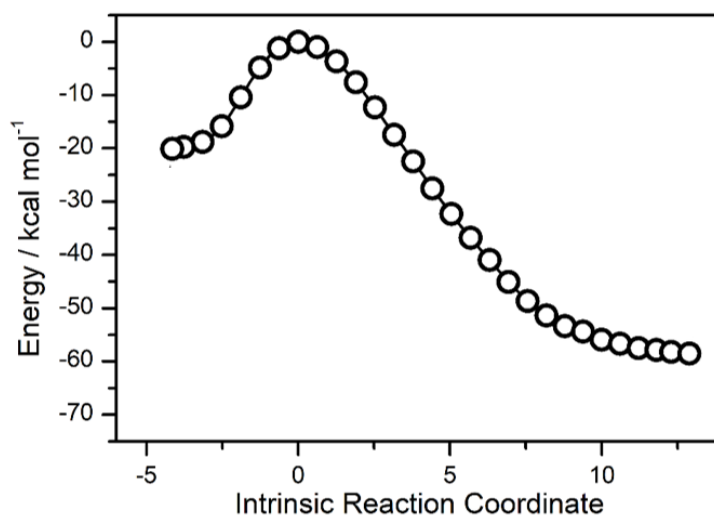

**Figure S26.** IRC plot for R<sub>2</sub>-CF<sub>3</sub>(III)-TSS2 (Figure S22) calculated at M06-2X/6-311++G(d,p) level of theory.

## 8.2 Calculation data for F-systems

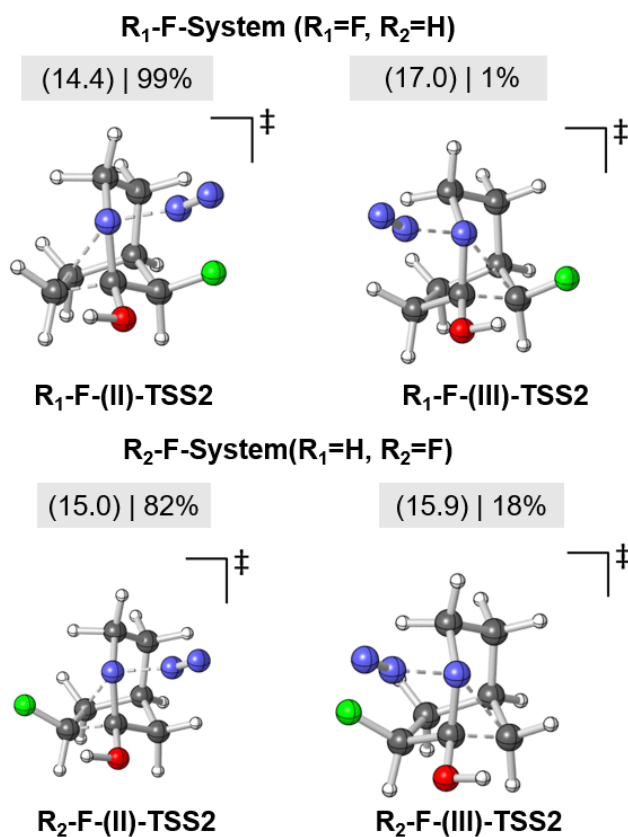

**Figure S27.** TSSs, relative free energies (in kcal mol<sup>-1</sup>, in parentheses) and percentage of formation for the second and rate determinant step for reaction presented in Scheme 1, R<sub>1</sub>-F-System (R<sub>1</sub>=F, R<sub>2</sub>=H) and R<sub>2</sub>-F-System (R<sub>1</sub>=H, R<sub>2</sub>=F), obtained at M06-2X/6-311++G(d,p) level of theory.

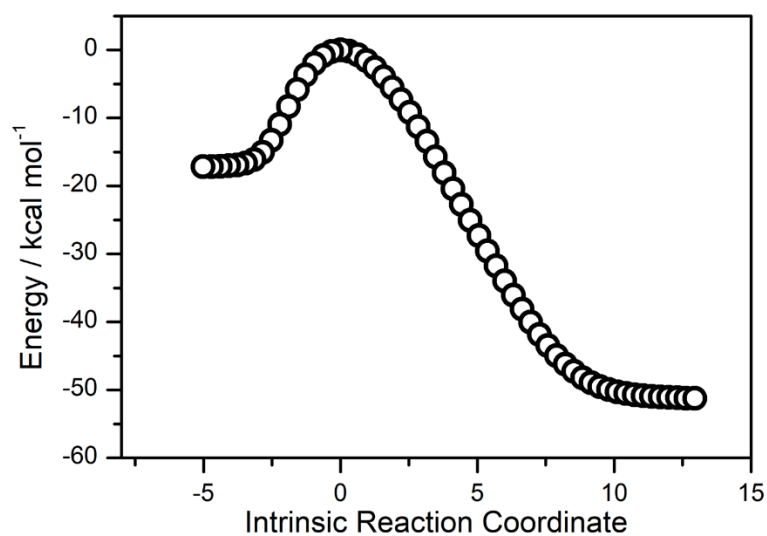

**Figure S28.** IRC plot for R<sub>1</sub>-F-(II)-TSS2 (Figure S27) calculated at M06-2X/6-311++G(d,p) level of theory.

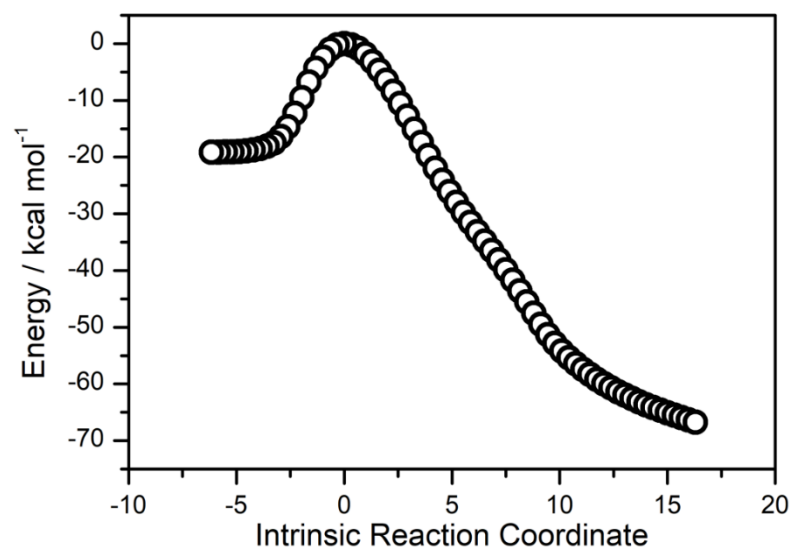

**Figure S29.** IRC plot for R<sub>1</sub>-F(III)-TSS2 (Figure S27) calculated at M06-2X/6-311++G(d,p) level of theory.

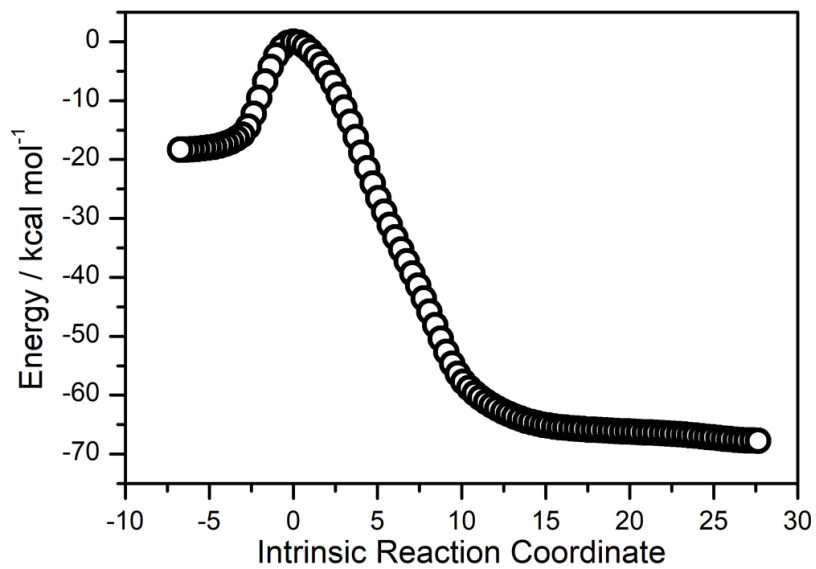

**Figure S30.** IRC plot for R<sub>2</sub>-F(II)-TSS2 (Figure S27) calculated at M06-2X/6-311++G(d,p) level of theory.

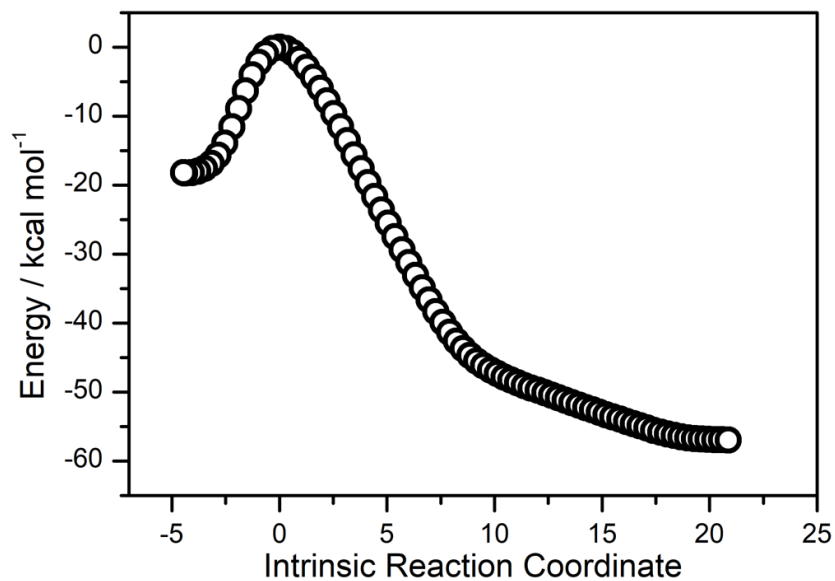

**Figure S31.** IRC plot for R<sub>2</sub>-F(III)-TSS2 (Figure S27) calculated at M06-2X/6-311++G(d,p) level of theory.

### 8.3. Calculation data for CH<sub>3</sub>-systems

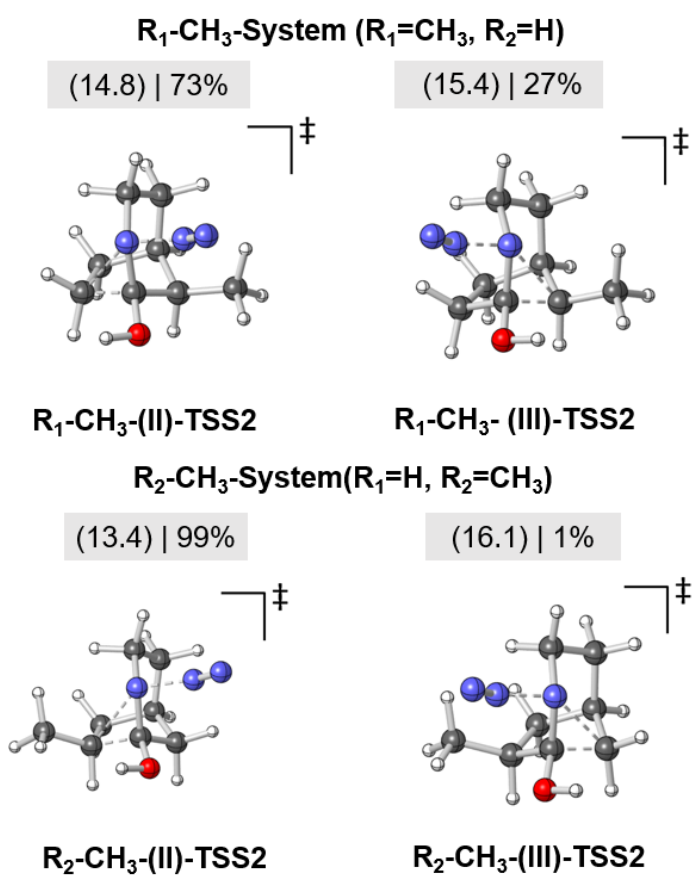

**Figure S32.** TSSs, relative free energies (in kcal mol<sup>-1</sup>, in parentheses) and percentage of formation for the second and rate determinant step for reaction presented in Scheme 1, R<sub>1</sub>-CH<sub>3</sub>-System (R<sub>1</sub>= CH<sub>3</sub>, R<sub>2</sub>=H) and R<sub>2</sub>- CH<sub>3</sub>-System (R<sub>1</sub>=H, R<sub>2</sub>= CH<sub>3</sub>), obtained at M06-2X/6-311++G(d,p) level of theory.

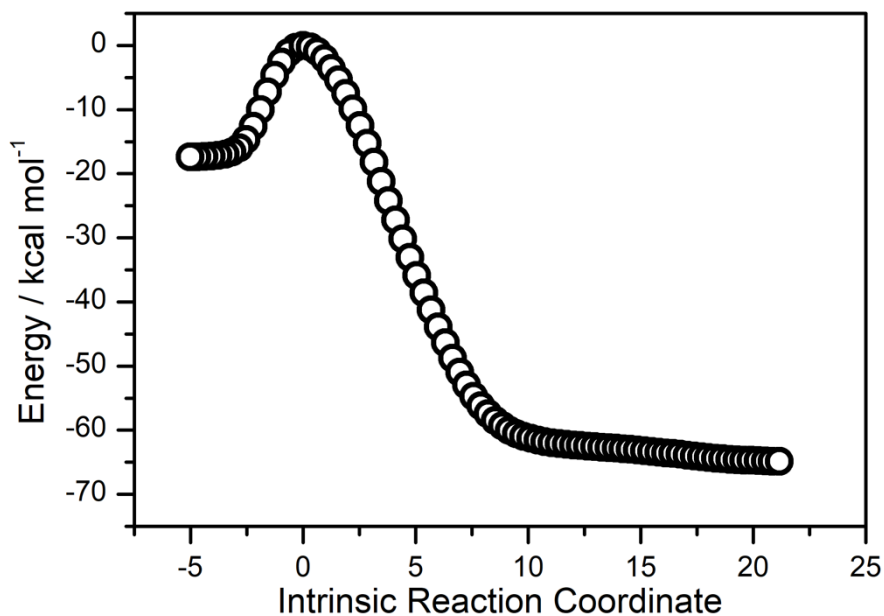

**Figure S33.** IRC plot for R<sub>1</sub>-CH<sub>3</sub>(III)-TSS2 (Figure S32) calculated at M06-2X/6-311++G(d,p) level of theory.

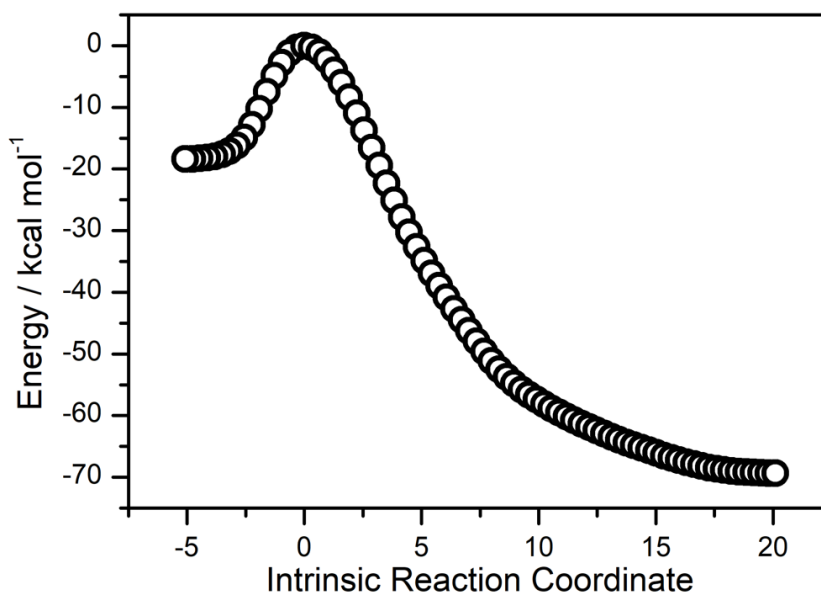

**Figure S34.** IRC plot for R<sub>1</sub>-CH<sub>3</sub>(III)-TSS2 (Figure S32) calculated at M06-2X/6-311++G(d,p) level of theory.



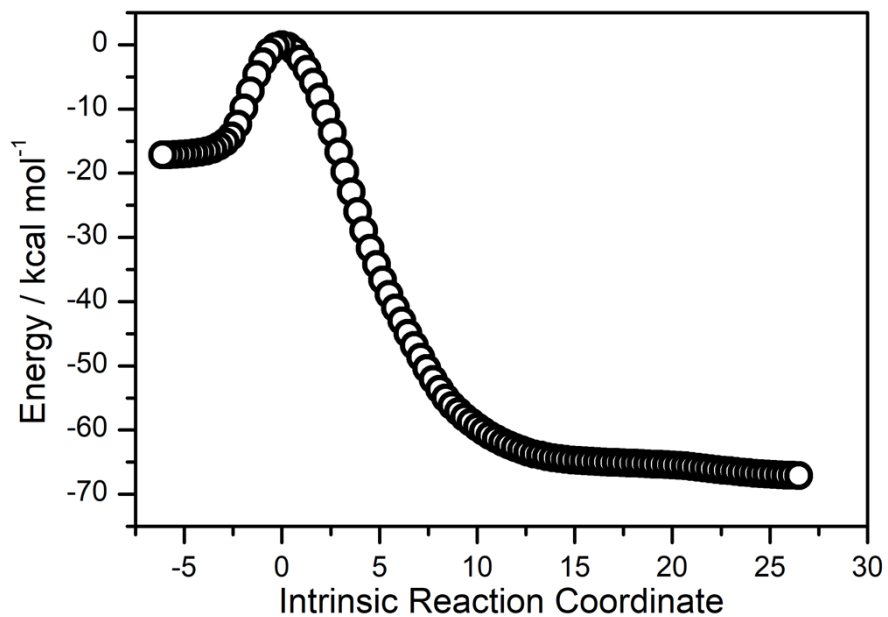

**Figure S35.** IRC plot for R<sub>2</sub>-CH<sub>3</sub>(II)-TSS2 (Figure S32) calculated at M06-2X/6-311++G(d,p) level of theory.

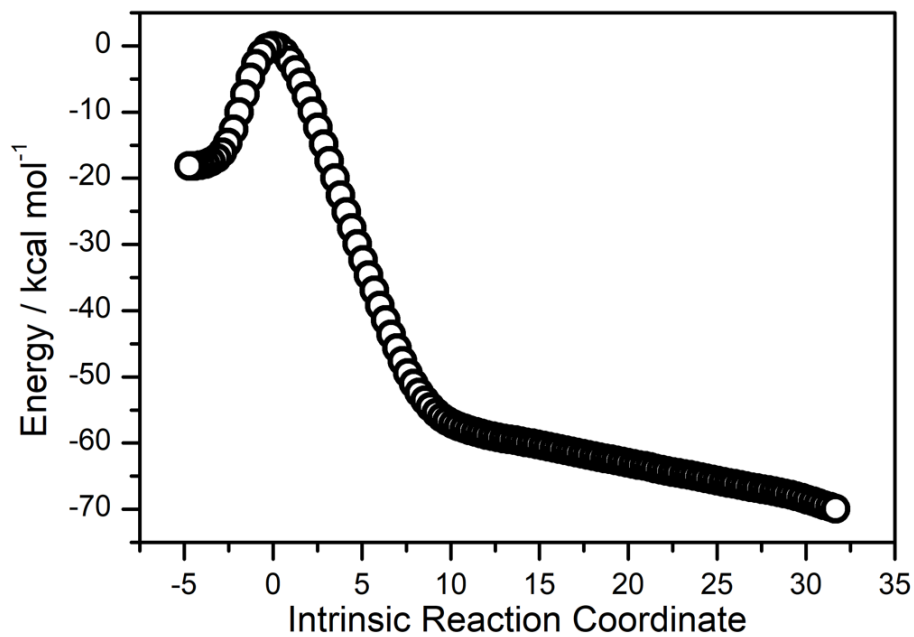

**Figure S36.** IRC plot for R<sub>2</sub>-CH<sub>3</sub>(III)-TSS2 (Figure S32) calculated at M06-2X/6-311++G(d,p) level of theory.
